1

2 **Apoptotic Extracellular Vesicles (ApoEVs) Safeguard Liver Homeostasis and**

3 **Regeneration *via* Assembling an ApoEV-Golgi Organelle**

4 Running title: Liver regulation by apoEVs *via* organelle assembly

5

6 Bingdong Sui<sup>1,2</sup>, Runci Wang<sup>2</sup>, Chider Chen<sup>2</sup>, Xiaoxing Kou<sup>2,3</sup>, Di Wu<sup>3</sup>, Ho-Chou Tu<sup>4</sup>,

7 Yanzhuang Wang<sup>5</sup>, Yijing Liu<sup>6</sup>, Orit Jacobson<sup>6</sup>, Xiaoyuan Chen<sup>6,7</sup>, Haixiang Liu<sup>8</sup>, Ryan Tsz Kin

8 Kwok<sup>8</sup>, Ben Zhong Tang<sup>8</sup>, Hexin Yan<sup>9</sup>, Minjun Wang<sup>10</sup>, Lei Xiang<sup>3</sup>, Xutong Yan<sup>3</sup>, Yu Fu<sup>3</sup>, Xiao

9 Zhang<sup>2</sup>, Jianxia Tang<sup>2</sup>, Lan Ma<sup>2,3</sup>, Lu Lu<sup>3</sup>, Yan Jin<sup>1,\*</sup>, Songtao Shi<sup>2,3,\*</sup>, ¶

10

11 <sup>1</sup>Research and Development Center for Tissue Engineering, The Fourth Military Medical  
12 University, Xi'an, Shaanxi 710032, China.

13 <sup>2</sup>Department of Anatomy and Cell Biology, University of Pennsylvania, School of Dental  
14 Medicine, Philadelphia, PA 19104, USA.

15 <sup>3</sup>South China Center of Craniofacial Stem Cell Research, Sun Yat-sen University, Guangzhou,  
16 Guangdong 510080, China.

17 <sup>4</sup>Alnylam Pharmaceuticals, Cambridge, MA 02142, USA.

18 <sup>5</sup>Department of Molecular, Cellular and Developmental Biology, University of Michigan, Ann  
19 Arbor, MI 48109, USA.

20 <sup>6</sup>Laboratory of Molecular Imaging and Nanomedicine (LOMIN), National Institute of  
21 Biomedical Imaging and Bioengineering (NIBIB), National Institutes of Health, Bethesda, MD  
22 20892, USA.

1 <sup>7</sup>Yong Loo Lin School of Medicine and Faculty of Engineering, National University of  
2 Singapore, Singapore, 119077, Singapore.

3 <sup>8</sup>Department of Chemical and Biological Engineering, Department of Chemistry, The Hong  
4 Kong Branch of Chinese National Engineering Research Center for Tissue Restoration and  
5 Reconstruction and Institute for Advanced Study, The Hong Kong University of Science and  
6 Technology, Clear Water Bay, Kowloon, Hong Kong, China.

7 <sup>9</sup>Department of Anesthesiology and Critical Care Medicine, Renji Hospital, Jiaotong University  
8 School of Medicine, Shanghai 200127, China.

9 <sup>10</sup>Department of Cell Biology, Center for Stem Cell and Medicine, Second Military Medical  
10 University, 800 Xiangyin Road, Shanghai 200433, China.

11

12 **\*Correspondence:** songtaos@upenn.edu (Songtao Shi) and yanjin@fmmu.edu.cn (Yan Jin).

13

14 **<sup>¶</sup>Lead Contact**

15 **Prof. Songtao Shi.** Department of Anatomy and Cell Biology, University of Pennsylvania, ,  
16 School of Dental Medicine, 240 South 40th Street, Philadelphia, PA 19104, USA. Tel:  
17 +1-215-898-3326. Fax: +1-215-573-5032. E-mail: songtaos@upenn.edu.

18

1 **Summary**

2 Apoptosis is an integral physiological cell death process that occurs frequently and generates  
3 a huge number of apoptotic extracellular vesicles (apoEVs). However, whether apoEVs are  
4 necessary for maintaining organ homeostasis remains unclear. Here, we show that circulatory  
5 apoEVs engraft in liver and undergo specialized internalization by hepatocytes (HCs) based  
6 on surface signature of galactose and *N*-acetylgalactosamine. Furthermore, apoEVs rescue  
7 liver injury in apoptotic-deficient *Fas* mutant and *Caspase-3* knockout mice, which is exerted  
8 by restoring the featured hepatic ploidy homeostasis. Surprisingly, apoEVs form a chimeric  
9 organelle complex with recipient Golgi apparatus *via* SNARE-mediated membrane interaction,  
10 which consequently facilitates microtubule organization and HC cytokinesis. Notably, through  
11 Golgi recovery and ploidy transition, apoEVs contribute to liver regeneration and protect  
12 against acute hepatic failure. Collectively, these results identify a previously unrecognized role  
13 for apoEVs and the specific mechanisms by which they safeguard liver homeostasis, and  
14 suggest the potential of apoEV-based therapy for liver disorders.

15

16 **Keywords**

17 Apoptosis; extracellular vesicle; liver homeostasis; regenerative therapy; Golgi assembly;  
18 ploidy transition

19

## 1 **Introduction**

2 Apoptosis is a form of programmed cell death that primarily accounts for routine cell turnover  
3 in healthy individuals; it is estimated to occur in the human body at a rate of approximately  
4 150 billion cells or roughly 0.4% of total cells per day (Arandjelovic and Ravichandran, 2015;  
5 Elliott and Ravichandran, 2016; Morioka et al., 2019). Such physiological cell death is  
6 recognized as an integral part of development and homeostatic maintenance, while it also  
7 contributes to tissue stress responses and regeneration (Fuchs et al., 2013; Fuchs and Steller,  
8 2011). During apoptosis, cells undergo a highly regulated process of disassembly including  
9 membrane blebbing and protrusion, which ultimately leads to generation of apoptotic  
10 fragments as extracellular vesicles (EVs) (Atkin-Smith et al., 2015; Coleman et al., 2001;  
11 Poon et al., 2014). The heterogeneity of these EVs, originally known as apoptotic bodies  
12 (apoBDs), has recently begun to be appreciated (Caruso and Poon, 2018). They vary in their  
13 mechanisms of production, cargos, and size ranging from 50 nm to several microns; for these  
14 reasons, the more general term of apoptotic extracellular vesicles (apoEVs) is now favored  
15 (Caruso and Poon, 2018; Dieude et al., 2015; Lynch et al., 2017). Tens of apoEVs can be  
16 released per cell, and they have increasingly been noticed as regulators of immune  
17 responses, stem cell-mediated tissue turnover and regenerative therapies (Berda-Haddad et  
18 al., 2011; Brock et al., 2019; Liu et al., 2018; Liu et al., 2020). However, the essential role of  
19 apoEVs in maintaining organ homeostasis remains underdetermined.

20 The liver has long been considered as a major organ for apoptotic cell removal from  
21 circulation, a function which is mostly attributed to the resident macrophages, called Kupfer  
22 cells (Shi et al., 1996). It is generally believed that efficient phagocytosis is tolerogenic and

1 critically maintains liver homeostasis, whereas defective efferocytosis contributes to a  
2 spectrum of hepatic pathologies due to overwhelming apoptotic material-induced  
3 hyperinflammation (Morioka et al., 2019). Engulfment of apoEVs by liver macrophages can  
4 nevertheless be pro-inflammatory and fibrogenic (Canbay et al., 2003), leaving the detailed  
5 roles played by apoEVs in the liver controversial and elusive. Notably, the liver is also well  
6 known for its extreme and rapid capacity to regenerate after injuries, while loss or impairment  
7 of this regenerative capacity underlies severe or chronic liver damage that may eventually  
8 progress to hepatic failure (Forbes and Newsome, 2016). It has been reported that mice  
9 lacking either caspase-3 or caspase-7, the key apoptotic executors, demonstrate a  
10 substantial defect in liver regeneration after partial hepatectomy (PHx) (Li et al., 2010).  
11 Delayed liver regeneration after PHx has also been documented in Fas-deficient  
12 lymphoproliferative (*Fas<sup>lpr</sup>*) mice, which show defective Fas-induced apoptosis and resemble  
13 human systemic lupus erythematosus, an autoimmune disease associated with increased  
14 susceptibility to liver disease (Bessone et al., 2014; Desbarats and Newell, 2000;  
15 Watanabe-Fukunaga et al., 1992). In light of these findings, understanding the regulatory  
16 function and mechanisms of apoEVs in the liver will have significant implications for  
17 deciphering principles that underlie hepatic regeneration and establishing novel therapies for  
18 hepatic disease.

19 EVs have emerged as playing pivotal roles in intercellular communication based on their  
20 surface bioactive molecules and various types of cargos including nucleic acids, proteins and  
21 lipids (Pitt et al., 2016; Roy et al., 2018). Given these properties, EVs serve as homeostatic  
22 modulators and can be leveraged in both diagnostics and therapeutics (Pitt et al., 2016; Roy

1 et al., 2018). ApoEVs, however, are a relatively understudied EV population which possess  
2 unique molecular signatures (Dieude et al., 2015; Wickman et al., 2013). Despite the  
3 characterization of EVs and their potent functions, how these vesicles recognize recipient  
4 cells and what processes they undergo in recipient cells are not yet fully understood. The  
5 current model postulates uptake of EVs *via* endocytosis, after which they shuttle within  
6 endosomes, surf on the endoplasmic reticulum and finally fuse with acidified endosomes or  
7 lysosomes for cargo release (Heusermann et al., 2016; Joshi et al., 2020). Nevertheless, we  
8 have limited knowledge of the specific mechanisms that EVs use to target certain recipient  
9 cells and the biological effects that EVs may exert on the recipient endomembrane system.

10 Here, we aimed to investigate the biological properties and related physiological function  
11 of apoEVs in maintenance of organ homeostasis. We discovered that apoEVs are  
12 characterized by specific surface markers which endow them with remarkable liver  
13 engraftment, specialized internalization by hepatocytes (HCs) and functional assembly with  
14 recipient Golgi apparatus. ApoEVs were further revealed to crucially preserve hepatic ploidy  
15 homeostasis, maintain liver integrity, promote liver regeneration after PHx and mediate  
16 therapy against acute liver failure (ALF) in mice. These findings suggest a general  
17 understanding of the characterization, function, mechanisms and application of apoEVs  
18 underlying organ maintenance and regeneration, with potential applications for novel  
19 therapeutics.

20

## 1 **Results**

### 2 **Circulatory apoEVs engraft in the liver and safeguard liver homeostasis**

3 ApoEVs used in this study were induced from multiple cell types (stem/stromal cells, immune  
4 cells and fibroblasts) and different species (human and mouse) and by various methods  
5 (protein kinase inhibition, oxidative stress, mitochondrial permeabilization and Fas  
6 crosslinking) targeting both the intrinsic (*i.e.* mitochondrial) and extrinsic (*i.e.* death receptor)  
7 pathways of apoptosis (Xu and Shi, 2007). Among these, the apoEVs primarily discussed  
8 here are those derived from mesenchymal stem cells (MSCs) after staurosporine (STS)  
9 treatment (Liu et al., 2018; Liu et al., 2020). Notably, the protein kinase inhibitor STS has been  
10 recognized as an apoptosis inducer *via* both caspase-dependent and caspase-independent  
11 pathways (Belmokhtar et al., 2001). Moreover, MSCs represent potent EV donors with  
12 immense translational potential, and require the apoptotic process to fulfill their therapeutic  
13 effects after transplantation (Galleu et al., 2017; Liu et al., 2020). The protocol was  
14 determined according to our previously established methodology for isolating apoBDs (Liu et  
15 al., 2018; Liu et al., 2020) with necessary modifications for collecting the general apoEV  
16 population more broadly (Figure S1A). STS-induced apoptosis of MSCs was confirmed by  
17 morphology (Figure S1B) and terminal deoxynucleotidyl transferase dUTP nick end labeling  
18 (TUNEL) analysis (Figure S1C). Notably, the protein yield of collected apoEVs was 10-fold  
19 higher than that of exosomes (Exos) released by MSCs in the non-apoptotic culture condition  
20 (Figure S1D). ApoEVs demonstrated characteristic morphology (Figure S1E) with a wide size  
21 distribution between 100-800 nm in diameter (Figure S1F). Further analyses revealed that the  
22 apoEVs expressed apoptotic markers such as cleaved caspase-3 and surface exposures of

1 typical phagocytosing signals (Arandjelovic and Ravichandran, 2015) phosphatidylserine  
2 (PtdSer, shown by Annexin V binding), complement component 1q (C1q) and  
3 thrombospondin 1 (TSP1) (Figure S1G-J). Nevertheless, apoEVs did not express the nuclear  
4 lamina component Lamin B1, a negative marker of EVs (Figure S1J). Therefore, apoEVs  
5 were verified with their specialized profiles being discovered.

6 To investigate the potential physiological function of apoEVs, we first examined the  
7 biodistribution of circulatory apoEVs by tracing labeled apoEVs after intravenous infusion.  
8 Positron emission tomography (PET) scanning of live mice demonstrated that copper  
9 radioisotope ( $^{64}\text{Cu}$ )-labeled apoEVs engraft in liver, among other tissues, as early as 1 h after  
10 infusion (Figure 1A). Surprisingly, in a 48 hours period, the  $^{64}\text{Cu}$  radioisotope signal indicating  
11 apoEVs increasingly aggregated in liver, with approximately 70% of total  $^{64}\text{Cu}$ -apoEV signal  
12 detected in liver at 48 h; at this point, the liver had 10-fold higher  $^{64}\text{Cu}$ -apoEV radiation  
13 intensity than any other dissected organ/tissue (Figure 1A). Tracing of apoEVs labeled with  
14 the lipophilic fluorescent dye PKH26 confirmed that liver engraftment after infusion proceeded  
15 in a manner resembling zero-order elimination kinetics, *i.e.* a constant amount being  
16 eliminated per unit time, with a half-time ( $t_{1/2}$ ) of about 8 days (Figure 1B). The linear change  
17 indicated that the liver biologically processed or metabolized apoEVs.

18 The above data inspired us to explore whether hepatic apoEVs were indeed associated  
19 with any functional implications. To address this issue, we studied two mouse models with  
20 deficiency in apoptosis (Liu et al., 2018), specifically *Fas* mutant (*Fas<sup>mut</sup>*, characterized by  
21 functionally deficient *Fas*, previously referred to as the *Fas<sup>lpr</sup>* mice (Watanabe-Fukunaga et al.,  
22 1992)) and *Caspase-3* knockout (*Casp3<sup>-/-</sup>*) mice. As has been previously established (Xu and



1 Shi, 2007), the Fas ligand (FasL)/Fas pathway is a well-characterized extrinsic apoptosis  
2 pathway, while caspase-3 is critical for the final execution phase of both intrinsic and extrinsic  
3 pathways of apoptosis. We confirmed that *Fas<sup>mut</sup>* and *Casp3<sup>-/-</sup>* mice are both defective in  
4 physiological apoptosis, as shown by decreased circulatory and organ-specific cellular  
5 apoptotic rates in freshly isolated peripheral blood mononucleated cells (PBMNCs) (Figure  
6 S1K), bone marrow mononucleated cells (BMMNCs) (Figure S1L) and liver non-parenchymal  
7 cells (NPCs) (Figure S1M). We have also introduced a liver EV isolation protocol (Figure S1N)  
8 (Ishiguro et al., 2019) and applied Annexin V binding to detect a tissue-specific apoEV  
9 population (Liu et al., 2018). The liver EVs were identified based on morphology, particle  
10 distribution, expression of tetraspanins CD9, CD63 and CD81, and negative for Lamin B1  
11 (Figure S1O-Q).

12 A chronic intermittent apoEV infusion protocol at a biweekly interval was designed based  
13 on the hepatic elimination kinetics to replenish hepatic apoEVs (Figure 1C). Notably, systemic  
14 infusion of apoEVs had limited influence on general traits of *Fas<sup>mut</sup>* mice in terms of body  
15 weight (BW) gain (Figure S2A), food intake (Figure S2B) and daily spontaneous activity  
16 (Figure S2C). Also notable is that despite being recognized as a lymphoproliferative model  
17 (Watanabe-Fukunaga et al., 1992), *Fas<sup>mut</sup>* mice used in this study (8-16 weeks of age on the  
18 B6 background) did not show inflammatory features and their inflammation level remained  
19 comparable to wild type (WT) upon apoEV infusion (Figure S2D). As expected, we discovered  
20 that *Fas<sup>mut</sup>* mice possessed less than half amount of liver apoEVs as WT mice, a deficiency  
21 which was recovered by apoEV infusion (Figure 1D). The total liver tissue EV quantity,  
22 however, was unchanged despite *Fas<sup>mut</sup>* and apoEV infusion (Figure S2E), indicating the

1 ability of the organism to adapt and maintain the tissue EV pool at a constant level.  
2 Importantly, partial loss of apoEVs in the liver of *Fas<sup>mut</sup>* mice was functionally sufficient to  
3 provoke liver injury, as demonstrated by a reduced fasting liver weight (LW) to BW ratio,  
4 obvious alterations upon gross examination and in histological analysis, and elevated serum  
5 levels of alanine aminotransferase (ALT) and aspartate aminotransferase (AST) (Figure  
6 1E-G). ApoEV infusion restored the liver tissue integrity in *Fas<sup>mut</sup>* mice (Figure 1E-G) without  
7 triggering fibrotic or inflammatory responses (Figure S2F, G). Furthermore, apoEV infusion  
8 also rescued the liver damage developed by *Casp3<sup>-/-</sup>* mice due to hepatic apoEV deficiency  
9 (Figure S3A-E).

10 In analyzing liver tissue injuries, we noticed with interest that *Fas<sup>mut</sup>* mice tended to  
11 possess a high percentage of binucleated HCs, and that cytoplasm vacuolization occurred in  
12 a high prevalence in these binucleated HCs (Figure 1F). One cellular characteristics of the  
13 mammalian liver is the polyploidization of HCs, during which individual HCs acquire more than  
14 two sets of chromosomes resulting from the failure of cytokinesis (Wang et al., 2017).  
15 Progressive polyploidization is considered a pathophysiological process in the liver (Gentric et  
16 al., 2015), but the detailed contributions of polyploid HCs to liver function and their regulatory  
17 mechanisms are not fully understood (Wilkinson et al., 2019a; Wilkinson et al., 2019b; Zhang  
18 et al., 2018a). We further evaluated whether apoEVs regulate the HC ploidy status in the liver.  
19 Phalloidin staining revealed HC cell borders and demonstrated that *Fas<sup>mut</sup>* mice aggregated  
20 more binucleated HCs than mononucleated HCs compared to WT mice, which was rescued  
21 by apoEV infusion (Figure 1H). Moreover, propidium iodide (PI) staining of HC chromatin  
22 showed that *Fas<sup>mut</sup>* mice possessed reduced diploid (2N) HCs and increased tetraploid (4N)

1 HCs compared to WT mice, which was also rectified by apoEV infusion (Figure 1I). Octoploid  
2 (8N) HCs were not significantly influenced in the experimental context. ApoEV infusion also  
3 restored the ploidy homeostasis in *Casp3*<sup>-/-</sup> mouse livers, which developed polyploidization as  
4 well (Figure S3F, G). Taken together, these data suggest that apoEVs are indispensably  
5 required for safeguarding liver ploidy and functional homeostasis (Figure 1J).

6

### 7 **Specialized internalization of apoEVs by HCs promotes ploidy transition in the liver**

8 Next, we investigated how apoEVs regulate liver homeostasis. Considering the clues that  
9 apoEVs may contribute to the reversal of HC polyploidization, we examined whether HCs,  
10 particularly binucleated ones, uptake apoEVs directly for their functional regulation. By using  
11 PKH26 to label the membrane of apoEVs before infusion, we confirmed that binucleated HCs  
12 in the liver were indeed capable of taking up apoEVs, such that PKH26 fluorescent signals  
13 were detected in approximately 40% of HCs at 24 hours after infusion (Figure 2A).  
14 PKH26-labeled infused apoEVs were also engulfed by F4/80<sup>+</sup> liver-resident macrophages  
15 (Figure S2H). Given that lipophilic membrane labeling may be xenobiotic and result in loss of  
16 membrane integrity, among other drawbacks, we further applied a previously established  
17 mitochondria-targeting luminogen, known as DCPy, with aggregation-induced emission (AIE)  
18 characteristics (Zheng et al., 2020). This AIE luminogen (AIEgen) is a photosensitizer which  
19 generates singlet oxygen (<sup>1</sup>O<sub>2</sub>) upon light irradiation and induces apoptosis (Zheng et al.,  
20 2020; Zheng et al., 2018). We identified that DCPy efficiently labeled apoEVs after apoptotic  
21 induction, and that the AIEgen-labeled apoEVs were mainly internalized by HCs after the  
22 infusion (Figure 2A, S2H), suggesting that HCs are the primary cellular targets of apoEVs in

1 the liver. To further examine whether the HC uptake of apoEVs occurred as a physiological  
2 event, we applied a parabiosis model in which *Fas<sup>mut</sup>* apoptosis-deficient mice were  
3 connected with green fluorescent protein (GFP) transgenic mice (*GFP<sup>+/+</sup>*) to obtain shared  
4 circulatory apoEVs (Liu et al., 2018). Indeed, GFP signals were detected in binucleated HCs  
5 of the *Fas<sup>mut</sup>* mice (Figure 2B). These data indicated a putative link between internalization of  
6 apoEVs by HCs, particularly binucleated ones, and functional regulation of the liver.

7 We continued to dissect the reasons for and functional results of apoEVs being  
8 selectively taken up by HCs. It has been documented that HCs specifically bind and  
9 internalize galactose (Gal)- or *N*-acetylgalactosamine (GalNAc)-terminating glycoproteins  
10 through the featured asialoglycoprotein receptor (ASGPR) (Ashwell and Harford, 1982), and  
11 that desialylated glycans characterized by Gal and GalNAc residues are exposed on the  
12 surface of apoptotic cells (Dini et al., 1992). Thus, we investigated whether apoEVs use the  
13 sugar recognition system for HC internalization. Using fluorescent lectin conjugates  
14 specifically binding the desialylated residues, we revealed that both Gal and GalNAc were  
15 exposed on the surface of apoEVs; particularly, GalNAc marked over 90% of apoEVs (Figure  
16 2C). Furthermore, GalNAc abundance in apoEVs was higher than in Exos and in source  
17 MSCs when normalized by total membrane labeling fluorescent units, suggesting an  
18 apoEV-specific profile (Figure 2C). To evaluate whether the Gal/GalNAc-ASGPR system is  
19 indeed pivotal to apoEV uptake by HCs, we treated primary cultured HCs with apoEVs under  
20 different conditions with competing exogenous Gal/GalNAc or the ASGPR-specific antibody  
21 (Dini et al., 1992; McVicker et al., 2002) (Figure 2D). Data demonstrated that both the added  
22 monosaccharide mixture and the ASGPR antibody effectively inhibited HC uptake of apoEVs

1 (Figure 2E). Furthermore, we noticed in this simple short-term culture process that  
2 mononucleated diploid HCs became binucleated and polyploidized, and we managed to track  
3 the subsequent ploidy transition of tetraploid hepatocytes in particular using a mitogenic  
4 stimulation system after sorting (Duncan et al., 2010) (Figure 2F). We discovered that 4N-HCs  
5 from *Fas<sup>mut</sup>* mice rarely underwent complete cytokinesis marked by the microtubule “midbody”  
6 structure (Figure 2G) and failed to produce 2N daughter cells (Figure 2H). Intriguingly, apoEV  
7 treatment empowered the *Fas<sup>mut</sup>* 4N-HCs to bypass cytokinesis failure and induced an  
8 emergence of 2N populations, indicating ploidy reversal (Figure 2G, H). Collectively, these  
9 data suggest that specialized uptake of apoEVs by HCs promotes ploidy transition.

10 The above results prompted us to investigate whether apoEV-promoted HC ploidy  
11 transition is of functional significance to the liver. By sorting and comparing properties of 2N-  
12 and 4N-HCs (Figure S4A), we discovered that 4N-HCs possessed lower oxidative metabolic  
13 activity but accumulated more reactive oxygen species (ROS) than 2N-HCs, irrespective of  
14 the derivation from apoEV deficiency or replenishment conditions (Figure S4B, C). The  
15 oxidative stress in 4N-HCs was possibly due to a general decline of expression of antioxidant  
16 genes (Figure S4D), potentially underlying the injury-proneness of binucleated HCs in the liver.  
17 Notably, apoEV treatment maintained the oxidative phosphorylation (OXPHOS) rate and  
18 restrained the oxidative stress of unsorted HCs (Figure S4E, F), which might be attributed to  
19 ploidy reversal effects of apoEVs.

20 To confirm whether apoEVs indeed regulate liver function by targeting HCs to promote  
21 ploidy transition, we designed *in vivo* experimental protocols using high-dose intermittent  
22 injection of GalNAc at 500 mg/kg to inhibit apoEV uptake by HCs, and low-dose intermittent

1 administration of GalNAc-conjugated small interfering RNAs (siRNAs) for *Anillin* (G-si*Anln*) at  
2 4 mg/kg to specifically inhibit HC cytokinesis (Figure 2I). As previously established, GalNAc  
3 conjugation allows targeted delivery of siRNAs to HCs with limited off-target effects, and  
4 Anillin is an actin-binding protein required for cytokinesis (Zhang et al., 2018a; Zhang et al.,  
5 2018b). We confirmed that only the high-dose GalNAc injection effectively suppressed liver  
6 engraftment of apoEVs (Figure 2J), and that G-si*Anln* administration selectively  
7 down-regulated *Anln* mRNA expression in HCs (Figure 2K). Furthermore, both GalNAc and  
8 G-si*Anln* administration inhibited apoEV restoration of HC ploidy homeostasis in *Fas<sup>mut</sup>* mice,  
9 leaving lower percentages of mononucleated and diploid HCs in the liver compared to the  
10 control siRNA-injected (G-si*Luc*) *Fas<sup>mut</sup>* mice with apoEV infusion (Figure 2L, M). Importantly,  
11 hematoxylin and eosin (H&E) staining of liver tissues and serum ALT analysis demonstrated  
12 that either blocking HC uptake of apoEVs or inhibiting HC cytokinesis diminished  
13 apoEV-mediated maintenance of liver integrity under apoptotic deficiency (Figure 2N, O).  
14 These results suggested that internalization of apoEVs by HCs promotes ploidy transition for  
15 liver homeostasis (Figure 2P).

16 We further examined the parabiosis model to investigate whether physiological apoEVs  
17 contribute to liver homeostasis maintenance (Figure S5A). Intermittent injection of GalNAc  
18 was also applied to inhibit HC uptake of apoEVs in *GFP<sup>+/+</sup>*-paired *Fas<sup>mut</sup>* mice (Figure S5A, B).  
19 As shown by H&E staining and serum ALT analysis, 2-month parabiosis with healthy *GFP<sup>+/+</sup>*  
20 mice helped the paired *Fas<sup>mut</sup>* mice to recover from liver injury, while GalNAc injection  
21 suppressed the effects (Figure S5C, D). Furthermore, parabiosis with *GFP<sup>+/+</sup>* mice reduced  
22 the percentages of binucleated HCs and promoted emergence of 2N-HCs in the liver of *Fas<sup>mut</sup>*

1 mice, both of which were also counteracted by GalNAc injection (Figure S5E, F). These data  
2 indicate that circulatory endogenous apoEVs maintained liver ploidy and functional  
3 homeostasis through HC uptake.

4

5 **ApoEVs interact with recipient Golgi apparatus to form a chimeric organelle complex**  
6 **for HC cytokinesis**

7 Next, we aimed to decipher how apoEVs facilitate ploidy transition of HCs. In the previous *in*  
8 *vivo* and *in vitro* tracing experiments, we noticed that internalized apoEVs gathered in the  
9 perinuclear region of HCs (Figure 2A and 2E). Intriguingly, it has been reported that following  
10 endocytosis, the Golgi apparatus receives cargo by a process called backward/retrograde  
11 transport (Johannes and Popoff, 2008), while the destination of EVs in recipient cells remains  
12 uncertain (Heusermann et al., 2016; Liu et al., 2020). We stained HC Golgi *in vivo* using an  
13 antibody against Golgin84 (also known as Golga5), an integral Golgi membrane protein. We  
14 discovered that almost all internalized apoEVs in binucleated HCs contact with the Golgi  
15 membrane, which occurred rapidly at 24 h post-apoEV infusion or as a physiological event  
16 during parabiosis (Figure 3A). To further characterize apoEV interactions with the recipient  
17 Golgi, we transfected sorted 4N-HCs in culture with GFP-plasmids labeling  
18 *N*-acetylgalactosaminyltransferase 2 (GALNT2), a Golgi-localized enzyme. We found that  
19 apoEVs were indeed closely adjacent to and specifically contacted the perinuclear Golgi  
20 apparatus in interphase, during which apoEVs and recipient Golgi formed a chimeric  
21 three-dimensional structure by apoEVs “inserting” into Golgi “pits”, “bridging” Golgi tubules  
22 and circling around Golgi “ends” (Figure 3B). The Golgi apparatus is increasingly

1 acknowledged as a microtubule organizing center (MTOC) which safeguards mitotic spindle  
2 formation and cell division (Wei et al., 2015). In addition, microtubules are regulated by  
3 post-translational modifications, including acetylation at the lysine 40 (K40) residues of  
4  $\alpha$ -tubulin, which indicates stabilization of microtubules for functional execution (Montagnac et  
5 al., 2013). We further revealed that perinuclear interactions between apoEVs and Golgi in  
6 binucleated HCs were also associated with microtubule organization, particularly formation of  
7 acetylated microtubules, which also enriched in the perinuclear region and co-localized with  
8 the apoEV-Golgi chimeric structure in the interphase (Figure 3C). Moreover, the intimate  
9 spatial and structural correlations among apoEVs, Golgi and acetylated microtubules were  
10 also detected in HC cytokinesis with the midbody actually formed by the acetylated  
11 microtubules (Figure 3C), suggesting functional contributions to the cytokinesis process.

12 We were particularly interested in the chimeric structure formed by apoEVs and recipient  
13 Golgi, and further evaluated whether this interaction had functional implications for Golgi  
14 maintenance. By comparing the GALNT2-labeled Golgi morphology in sorted 4N-HCs from  
15 WT and *Fas<sup>mut</sup>* mice, we unexpectedly discovered that whereas the Golgi in WT 4N-HCs  
16 exhibited a relatively complete ribbon structure, the Golgi in *Fas<sup>mut</sup>* 4N-HCs was fragmented  
17 and dispersed (Figure 3D). Notably, when tracing labeled apoEVs in *Fas<sup>mut</sup>* 4N-HCs, the  
18 apoEVs enriched in the perinuclear region, where a complete Golgi was ought to be, while  
19 maintaining contact with the Golgi fragments or as Golgi “replenishments” (Figure 3D). As the  
20 GALNT2 represents a *medial/trans*-Golgi marker, we also performed immunofluorescent (IF)  
21 staining of 130 kDa Golgi matrix protein (GM130), a *cis*-Golgi marker. Data demonstrated that  
22 the GM130 fluorescence was also dispersed in *Fas<sup>mut</sup>* 4N-HCs, whereas in *Fas<sup>mut</sup>* 4N-HCs



1 after apoEV treatment, the GM130-labeled structure was tighter, with internalized apoEVs  
2 embedding among the Golgi stacks (Figure 3D). ApoEV contacts with the Golgi and  
3 protection of Golgi integrity were also found in *Casp3<sup>-/-</sup>* 4N-HCs (Figure S3H). These results,  
4 especially the apoEV-Golgi structural assimilation, inspired us to hypothesize that integration  
5 of apoEVs with the recipient Golgi may form a vesicle-organelle complex.

6 To test this hypothesis, we transfected apoEV source cells (*i.e.* MSCs) and sorted  
7 4N-HCs with mCherry- or EGFP-plasmids for enforced expression of the same targets, Golgi  
8 reassembly-stacking protein 55 (GRASP55, responsible for stacking of Golgi cisternae  
9 located in *medial*-Golgi) and GalT (galactosyltransferase, an enzyme on *trans*-Golgi  
10 membranes) (Figure 3E). After collecting apoEVs from the transfected MSCs and treating  
11 HCs with the apoEVs, we detected donor GRASP55/GalT integrated with their recipient  
12 counterparts (Figure 3E). Indeed, apoEVs carried a spectrum of Golgi proteins with varied  
13 abundance, including the Golgi stacking protein GRASP55, the *trans*-Golgi network protein 38  
14 (TGN38), Golgin84 for tethering of vesicles, and Syntaxin 5 (Stx5) for docking and fusion of  
15 vesicles (Figure 3F). Correspondingly, *Fas<sup>mut</sup>* HCs derived from apoptosis-deficient conditions  
16 showed varying degree of decline in the expression of multiple Golgi proteins, while apoEV  
17 treatment in culture replenished the insufficient Golgi proteins (Figure 3F). Rescue of Golgi  
18 integrity was further confirmed under electron microscopy, which revealed that the Golgi in  
19 *Fas<sup>mut</sup>* 4N-HCs was mostly dispersed into vesicle forms, whereas distinguishable Golgi stacks  
20 were observed after apoEV treatment (Figure 3G). Moreover, when quantified after isolation  
21 from cultured HCs, Golgi in the apoEV-deficient *Fas<sup>mut</sup>* mice lost over 50% of the protein mass,  
22 which was recovered by apoEV replenishment (Figure 3H). ApoEV-mediated Golgi recovery

1 was verified in *Casp3*<sup>-/-</sup> HCs as well (Figure S3I). Also, after using apoEVs derived from  
2 *GFP*<sup>+/+</sup> MSCs, the GFP signal was detected in the isolated HC Golgi (Figure 3I). Taken  
3 together, these data suggest that integration of apoEVs with recipient Golgi apparatus  
4 safeguarded the structural integrity of the Golgi organelle.

5 We then examined the functional results downstream of apoEV-induced Golgi recovery.  
6 First, we confirmed that either  $\alpha$ -tubulin or its acetylated form (ac- $\alpha$ -tubulin) was detected in  
7 the isolated HC Golgi (Figure 3I), indicating the Golgi was structurally conjugated to  
8 microtubules. Notably, *Fas*<sup>mut</sup> HC Golgi showed a decreased ac- $\alpha$ -tubulin level compared to  
9 WT HC Golgi, while apoEV treatment promoted the Golgi-conjugated microtubule acetylation  
10 (Figure 3I). These protein expression changes on isolated HC Golgi were consistent with  
11 general cellular changes of the 4N-HCs, in which apoEV treatment rescued the diminished  
12 perinuclear acetylated microtubules together with the assembled Golgi against *Fas*<sup>mut</sup>  
13 apoptotic deficiency (Figure 3J). To further demonstrate the significance of Golgi recovery for  
14 mediating effects of apoEVs, we applied Brefeldin A (BFA), a chemical that is commonly used  
15 to disrupt the Golgi organization. We revealed that BFA treatment induced Golgi disassembly  
16 despite the perinuclear apoEVs, and it also diminished apoEV-promoted acetylated  
17 microtubules and inhibited apoEV-rescued cytokinesis in *Fas*<sup>mut</sup> 4N-HCs (Figure 3J). Western  
18 blot analyses of microtubule acetylation levels in HCs confirmed these results, showing  
19 apoEV-upregulated ac- $\alpha$ -tubulin expression in *Fas*<sup>mut</sup> HCs being suppressed by BFA (Figure  
20 3K). Moreover, apoEV application triggered upregulation of a series of downstream cascade  
21 proteins for cytokinesis (Barr and Gruneberg, 2007) in *Fas*<sup>mut</sup> HCs (Figure 3K), such as the  
22 inner centromere protein (INCENP, a part of the chromosomal passenger complex regulating

1 cytokinesis), the mitotic kinesin-like protein 1 (MKLP1, also known as KIF23, a motor protein  
2 forming the centralspindlin complex with Racgap1), Rac GTPase-activating protein 1  
3 (RacGAP1, a microtubule-dependent signal for Rho regulation), and finally Ras homolog  
4 family member A (RhoA, the master regulator of contractile ring formation for abscission).  
5 Positive effects of apoEVs on the cytokinesis proteins were also diminished by BFA  
6 treatments (Figure 3K), resulting in suppressed function of apoEVs to promote 2N-HC  
7 emergence during ploidy transition of *Fas<sup>mut</sup>* 4N-HCs (Figure 3L). Collectively, the above data  
8 indicated that apoEVs assembled with recipient Golgi apparatus to form a chimeric organelle  
9 structure, which we hereby name as the ApoEV-Golgi Complex (AGC), for driving microtubule  
10 acetylation and safeguarding the cytokinesis process of HCs (Figure 3M).

11

## 12 **ApoEVs use the SNARE mechanism to assemble with Golgi and maintain liver** 13 **homeostasis**

14 Next, we investigated the molecules responsible for AGC assembly. The soluble  
15 *N*-ethylmaleimide-sensitive factor attachment protein receptor (SNARE) mechanism is  
16 recognized as mediating the final step in vesicle transport, *i.e.* docking and fusion of vesicles  
17 with the target membrane compartment, which is dependent on the interactions between  
18 specific molecules on the vesicles (the v-SNAREs) and on the target membranes (the  
19 t-SNAREs) (Pfeffer, 1996). Currently, there are three known v-SNAREs that mediate  
20 endosomal interactions with the Golgi in the retrograde route of transport: vesicle-associated  
21 membrane protein 3 (VAMP3, also known as cellubrevin), VAMP4 and Golgi SNARE of 15  
22 kDa (GS15) (Johannes and Popoff, 2008). With this knowledge, we examined whether

1 apoEVs, as examples of extracellular vesicles, may adopt the intracellular vesicle/endosomal  
2 mechanisms to interact with the Golgi apparatus. IF staining and flow cytometric analyses  
3 demonstrated that high percentages of apoEVs expressed VAMP3 and VAMP4 on their  
4 surfaces (84.0% positive for VAMP3, 66.7% positive for VAMP4), but virtually none expressed  
5 GS15 (less than 10% positive) (Figure 4A). Furthermore, VAMP3 protein expression in  
6 apoEVs was even higher than in the source MSCs (Figure 4B). To evaluate whether VAMP3  
7 and/or VAMP4 indeed mediate the AGC assembly, we transfected source MSCs with siRNAs  
8 for *Vamp3* and/or *Vamp4* and collected the *Vamp*-knockdown apoEVs for functional  
9 experiments (Figure 4C). Data demonstrated that in *Fas<sup>mut</sup>* 4N-HCs, knockdown of *Vamp3*  
10 alone was enough to prevent apoEVs from docking with the recipient Golgi without affecting  
11 the uptake, and the internalized *Vamp3*-knockdown apoEVs scattered in the cytoplasm away  
12 from the Golgi (Figure 4D). Knockdown of *Vamp4* had limited effects on the fate of apoEVs in  
13 recipient cells (Figure 4D). We further revealed that *Vamp3*-knockdown apoEVs did not  
14 rescue the fragmented Golgi, nor did they restore the diminished acetylated microtubules in  
15 *Fas<sup>mut</sup>* 4N-HCs (Figure 4E). To directly confirm that apoEVs adopted VAMP3 to assemble with  
16 the Golgi, we used the isolated Golgi system and detected hVAMP3 when treating HCs with  
17 hApoEVs, indicating integration of apoEV-VAMP3 into the recipient Golgi (Figure 4F). These  
18 data suggest that VAMP3 was the key factor in apoEV-mediated AGC assembly and  
19 functional effects of apoEVs.

20 It has been reported that certain VAMPs, including VAMP3, on synaptic vesicles can be  
21 cleaved by Tetanus toxin (TeNT) (McMahon et al., 1993). We verified that VAMP3 on apoEVs  
22 was also sensitive to TeNT treatment (Figure 4G), which provided a useful tool for evaluating

1 apoEV-VAMP3 function *in vivo*. Importantly, as shown by Golgin84 IF staining, we discovered  
2 that *in vivo* binucleated HCs in *Fas<sup>mut</sup>* mice were fragmented, consistent with the dispersed  
3 Golgi of *Fas<sup>mut</sup>* 4N-HCs in culture (Figure 4H). Furthermore, total Golgi protein mass in *Fas<sup>mut</sup>*  
4 mouse liver was decreased compared to WT mouse liver, corresponding to the decreased  
5 Golgi protein mass in cultured *Fas<sup>mut</sup>* HCs (Figure 4I). Notably, chronic intermittent infusion of  
6 apoEVs partially rescued the defective HC Golgi together with the declined liver Golgi in  
7 *Fas<sup>mut</sup>* mice (Figure 4H, I). These defects were also rectified by long-term parabiosis with  
8 *GFP<sup>+/+</sup>* mice, based on GalNAc-mediated physiological apoEV internalization (Figure S5G, H).  
9 Expectedly, infusion of *Vamp3*-knockdown apoEVs or TeNT-pretreated VAMP3-cleaved  
10 apoEVs failed to restore Golgi integrity in *Fas<sup>mut</sup>* mice (Figure 4H, I), confirming VAMP3 as the  
11 critical mediator of apoEV effects. The significance of VAMP3 to apoEV function was further  
12 verified by *Vamp3* knockdown or TeNT pretreatment abolishing the promotion of HC ploidy  
13 reversal and protection against liver injury in *Fas<sup>mut</sup>* mice by infused apoEVs (Figure 4J-M).  
14 Taken together, these results indicate that apoEVs used the SNARE mechanism to assemble  
15 with Golgi and activate downstream functional cascades to maintain liver homeostasis (Figure  
16 4N).

17

### 18 **ApoEV-mediated Golgi recovery and ploidy reversal contribute to liver regeneration**

19 Next, we investigated the implications of apoEV regulation of the liver. The liver is well known  
20 for its remarkable regenerative capabilities, which initiates a coordinated series of  
21 mechanisms to regain its original volume following injury or resections (Forbes and Newsome,  
22 2016). Interestingly, it has been documented that HC proliferation and/or hypertrophy

1 contribute to liver regeneration after PHx, while rapid division of binucleated HCs without  
2 mitosis particularly underlies liver regeneration after 70% PHx, a large-scale surgery after  
3 which the liver can recover (Hori et al., 2011; Mitchell and Willenbring, 2008; Miyaoka et al.,  
4 2012). Moreover, a recent study has demonstrated that the polyploid state restricts HC  
5 proliferation and liver regeneration in mice (Wilkinson et al., 2019b), although controversies  
6 exist (Matsumoto et al., 2020; Wilkinson et al., 2019a; Zhang et al., 2018a). We applied the  
7 commonly used 70% PHx model to examine the participation of apoEVs in the liver  
8 regeneration process (Figure 5A). At 72 h after 70% PHx, when one round of HC cell cycle is  
9 typically finished (Sakamoto et al., 1999), we confirmed regeneration of the remnant liver  
10 tissues to over 60% of the original liver mass, thus guaranteeing the survival of the mice  
11 (Figure 5B). Notably, compared to sham-treated mice that only underwent laparotomy, PHx  
12 mice demonstrated an increase in Annexin V-labeled hepatic apoEVs (Figure 5C), which  
13 might be related to a wave of cellular apoptosis accompanying mitosis of HCs (Sakamoto et  
14 al., 1999), indicating apoEVs being actively involved in the liver regeneration process.  
15 Furthermore, we discovered a slight increase of Golgin84-stained area in the regenerating  
16 liver (Figure 5D), together with a reduced percentage of binucleated HCs (Figure 5E),  
17 suggesting responses of Golgi being associated with apoEV changes and the ploidy transition  
18 of HCs in liver regeneration.

19 To reveal the functional significance of apoEVs to liver regeneration, we established an  
20 80% massive hepatectomy (MHx) mouse model (Figure 5F). Without intervention, mice may  
21 not survive this injury and typically die within 72 h after surgery (Hori et al., 2011). Importantly,  
22 infusion of apoEVs at 24 h prior to surgery substantially improved the survival rate of MHx

1 mice (Figure 5G) and promoted recovery of liver mass at 48 h after surgery (Figure 5H).  
2 Infusion of TeNT-pretreated VAMP3-cleaved apoEVs failed to promote liver regeneration and  
3 improve survival of MHx mice (Figure 5G, H). As expected, infusion of apoEVs significantly  
4 upregulated the Golgi abundance in liver after MHx, and the effects were diminished by TeNT  
5 pretreatments (Figure 5I). Moreover, apoEV infusion accelerated the division of binucleated  
6 HCs for rapid liver regeneration dependent on apoEV-VAMP3 expression (Figure 5J).  
7 Collectively, these data provide proof-of-concept evidence that apoEV-mediated Golgi  
8 recovery and ploidy reversal contribute to liver regeneration (Figure 5K).

9

#### 10 **ApoEVs protect against lethal liver failure through Golgi and ploidy restorations**

11 The above findings encouraged us to further unravel the therapeutic potential of apoEVs in  
12 counteracting liver diseases, by applying a clinically relevant model of ALF induced by lethal  
13 acetaminophen (APAP) challenge (Barbier-Torres et al., 2017; Stravitz and Lee, 2019). Due to  
14 overdoses of paracetamol and other medications for pain and fever control, APAP toxicity  
15 represents the principal cause of ALF in developed countries, estimated in the United States  
16 at about 30,000 patients hospitalized per year and accounting for 45.7% of all ALF cases  
17 (Blieden et al., 2014; Stravitz and Lee, 2019). However, how liver regeneration becomes  
18 overwhelmed or impaired in this circumstance, thus failing to restore the severely damaged  
19 liver, is not fully understood (Forbes and Newsome, 2016). In previous experiments, we  
20 noticed that declined hepatic apoEVs in *Fas<sup>mut</sup>* mice and *Casp3<sup>-/-</sup>* mice led to the onset of liver  
21 injury, which did not heal until apoEVs were replenished. We further observed in the lethally  
22 APAP-damaged liver, which again especially demonstrated severely injured binucleated HCs

1 (Figure 6A-C), that hepatic apoEVs were reduced (Figure 6D). Furthermore, we also found  
2 impaired liver Golgi after APAP challenge (Figure 6E), whereas the regenerative division of  
3 binucleated cells was not initiated (Figure 6F). These findings indicate that apoEV exhaustion  
4 with Golgi and ploidy transition impairments underlie diminished liver regeneration in ALF.

5 We therefore explored whether apoEV infusion could serve as an effective therapeutic for  
6 ALF (Figure 6G). Currently, the antioxidant *N*-acetyl L-cysteine (NAC) is the sole available  
7 and standard therapy to treat APAP overdose patients, but it is only effective as an antidote  
8 within a short time window of less than 8-12 h after APAP ingestion (Barbier-Torres et al.,  
9 2017). In light of this information, we applied apoEV infusion at 8 h post-APAP challenge and  
10 compared it to NAC supplied at the same time point (Figure 6G). Data demonstrated that  
11 while NAC administration at this time failed to rescue the severe liver damage induced by  
12 APAP, apoEVs provoked a surprisingly complete liver protection in surviving mice at 24 h after  
13 APAP injection (Figure 6H). Also, the effects of apoEVs were abolished by TeNT pretreatment  
14 for VAMP3 cleavage (Figure 6H). Further evaluation of mouse survival revealed that apoEV  
15 infusion, but not NAC injection, dramatically lowered the death rates, with effects diminished  
16 by TeNT pretreatment (Figure 6I). The ability of apoEVs to ameliorate APAP-induced ALF  
17 were attributed to the rescue of liver Golgi and further emergence of mononucleated HCs in  
18 liver, together with declined HC apoptosis, which were suppressed after apoEV-VAMP3 being  
19 cleaved by TeNT (Figure 6J-L). Collectively, these results suggest that apoEV infusion  
20 promotes HC recovery for ALF therapy (Figure 6M).

21 We took a final step to examine whether the functional molecules we discovered on the  
22 surface of STS-induced MSC-derived apoEVs, *i.e.* Gal/GalNAc and VAMP3, were general



1 profiles of apoEVs as functional markers for liver regulation. Based on flow cytometric  
2 analyses established above, we tested the exposure of apoEVs to PtdSer (Annexin V-binding),  
3 Gal/GalNAc and VAMP3 in the following circumstances: human MSCs (hMSCs) treated with  
4 ABT-737, a B-cell lymphoma-2 (Bcl-2) homology domain 3 (BH3)-mimetic that directly triggers  
5 permeabilization of the mitochondrial outer membrane to induce the intrinsic pathway of  
6 apoptosis (Medina et al., 2020) (Figure S6A); mouse activated T cells with Fas-crosslinking  
7 (anti-Fas treatment) to induce the extrinsic pathway of apoptosis, which represents a  
8 physiological source of apoEVs (Figure S6B); and STS-treated NIH/3T3 cells, which are a  
9 mouse fibroblast cell line representing differentiated cells, another physiological source of  
10 apoEVs (Figure S6C). Our data demonstrated that apoEVs collected from the different  
11 conditions uniformly exposed PtdSer and were characterized by surface Gal, GalNAc and  
12 VAMP3 (Figure S6A-C), suggesting a general apoptotic vesicular signature (AVS) marking a  
13 functional “envelope” of apoEVs for liver regulation (Figure S6D).

14

## 1 **Discussion**

2 Apoptosis is recognized as an integral physiological cell death process which occurs daily  
3 with a high prevalence and generates a huge number of apoEVs (Arandjelovic and  
4 Ravichandran, 2015; Atkin-Smith et al., 2015; Caruso and Poon, 2018; Fuchs and Steller,  
5 2011). However, whether apoEVs are necessary for maintaining organ homeostasis has  
6 remained unclear. In this study, we aimed to investigate the biological properties and the  
7 related physiological function of apoEVs in organ maintenance. We characterized apoEVs by  
8 their specific AVS and possession of liver engraftment properties. We found that apoEVs were  
9 recognized and internalized by HCs in the liver through the Gal/GalNAc-ASGPR system, in  
10 which they assembled with recipient Golgi apparatus to form a chimeric AGC structure based  
11 on the SNARE mechanism. AGC formation in binucleated HCs then activated downstream  
12 functional cascades including microtubule acetylation and cytokinesis, which were  
13 indispensable for ploidy transition of HCs to safeguard the diploid populations. Ultimately,  
14 apoEVs were of functional significance for maintaining liver homeostasis, promoting liver  
15 regeneration and mediating therapy against ALF. These findings collectively suggest a  
16 previously unrecognized role and mechanism of apoEVs in regulating liver function, shedding  
17 light on the potential of developing apoEV therapy for liver diseases.

18 Apoptosis represents the dominant modality of cell death in the normal homeostasis of  
19 multicellular organisms, and is indispensable not only for necessary cell elimination but also  
20 for regulation of fundamental life processes such as immune reactions, metabolism and  
21 regenerative proliferation (Fuchs et al., 2013; Fuchs and Steller, 2011; Han and Ravichandran,  
22 2011; Morioka et al., 2019). Effects of apoptosis are exerted through either a “passive” mode

1 by efferocytosis of apoptotic “corpses”, during which macrophages exert their own function  
2 (Morioka et al., 2018), or a more “active” form that involves controlled release of nucleotides,  
3 proteins and metabolites for regulation of phagocytosis and compensatory proliferation  
4 (Chekeni et al., 2010; Chera et al., 2009; Medina et al., 2020; Wickman et al., 2013). Among  
5 the paracrine signals, apoEVs possess unique properties as subcellular membrane-delimited  
6 particles, which encapsulate heterogeneous factors for distant and combinational messaging  
7 (Atkin-Smith et al., 2015; Dieude et al., 2015; Liu et al., 2018). We have previously reported  
8 that circulating apoEVs maintain stem cell function in bone and ameliorate osteopenia *via*  
9 transferring concerted signaling modulators (Liu et al., 2018). Others have documented that  
10 apoEVs deliver multiple mitogenic or alarm cues to trigger molecular and functional cascades  
11 for epithelial turnover and inflammation (Berda-Haddad et al., 2011; Brock et al., 2019;  
12 Wickman et al., 2013). In the present study, we established a regulatory link between  
13 hepatic/systemic apoEVs and liver homeostasis, mediated by specific apoptotic vesicular  
14 markers for destined engraftment and functional internalization. ApoEV contributions to liver  
15 homeostasis further underlie the effects of organismal apoptotic regulation. As far as we know,  
16 this is the first evidence for the requirement of apoEVs in organ homeostatic maintenance and  
17 reveals the previously unknown, specific mechanisms involved. The heterogeneity of apoEVs  
18 introduced by source cells, during the apoptotic process and among the potential subsets of  
19 apoEVs will be a critical issue to be addressed in next studies. Future studies will also need to  
20 elaborate upon the physiological source and identity of liver-regulating apoEVs, and trace  
21 their involvement in liver homeostasis and pathologies.

1           The liver is a vital organ that functions as the primary center for sustaining metabolism  
2           and disposing of toxins, and it is also known to clear systemic apoptotic cells through its  
3           resident macrophages (Shi et al., 1996). However, as apoptotic materials may overwhelm the  
4           phagocytic capacity of liver macrophages (Morioka et al., 2019), it is plausible that other  
5           hepatic cell populations contribute to digestion of the apoptotic “meal”. As the major cell type  
6           in the liver responsible for its function, HCs account for about 80% of liver weight and about  
7           70% of all liver cells; HCs also show the ability to engulf apoptotic cells (Dini et al., 1992;  
8           McVicker et al., 2002). In this study, notably, we reveal that HCs actually represent the main  
9           target of apoEVs in the liver, particularly for those free of xenobiotic membrane labeling.  
10          Furthermore, internalization of apoEVs by HCs induces functional results such as promoting  
11          cytokinesis. One possible mechanism enlightened by this study is that apoEVs control Golgi  
12          structure formation and function, as intact Golgi promotes microtubule polymerization and  
13          organization through the containing of  $\gamma$ -tubulin, the major nucleator of microtubules (Rios et  
14          al., 2004), and  $\alpha$ -tubulin acetyltransferase 1 ( $\alpha$ TAT1), the acetyltransferase specific to the K40  
15          residue of  $\alpha$ -tubulin (Nakakura et al., 2016), and improved Golgi-derived microtubule  
16          organization facilitates cell division and cytokinesis (Wei et al., 2015). These findings provide  
17          a new perspective on cell death, indicating that the contents of vesicles produced during  
18          apoptosis are naturally required for functional purposes, rather than just being efferocytosed.  
19          Intriguingly, other EV populations (e.g. Exos) also engraft in the liver and are involved in liver  
20          regulation (Wiklander et al., 2015; Ying et al., 2017), but the underlying reasons why the liver  
21          needs EVs are still elusive. Here, we for the first time uncovered that apoEVs indispensably  
22          participate in the unique ploidy transition process of HCs, which is characteristically seen in

1 hepatic postnatal development, aging and pathologies (Fortier et al., 2017; Wang et al., 2017).  
2 It is notable that non-apoptotic EVs may emerge to maintain a constant liver EV pool upon  
3 loss of apoEVs, as indicated in this study, whereas the endogenous source of the  
4 non-apoptotic EVs and their functional roles remain unrecognized. However, our findings  
5 contribute to explaining the high demand of the liver for apoEVs at the functional level,  
6 indicating the apoptotic materials reciprocally potentiate dynamic behaviors of living cells.  
7 These data consistent with recent studies by us and others suggesting that diploid HCs play a  
8 key role in maintaining liver homeostasis and regeneration (Gentric et al., 2015; Wang et al.,  
9 2014; Wilkinson et al., 2019b), although they are relatively low in abundance and their  
10 functional roles are still in controversial (Kreutz et al., 2017; Zhang et al., 2018a). Moreover,  
11 whether apoEVs exert differential effects on diploid and polyploid HCs, and whether apoEVs  
12 realize ploidy reversal of mononucleated polyploid HCs, remain to be investigated. Also to be  
13 examined is the responses of aneuploid HCs to apoEVs, which might promote genetic  
14 diversity among HCs in the liver and facilitate stress-induced liver adaptation (Duncan et al.,  
15 2012; Duncan et al., 2010). Our results pave an avenue for further extensive examinations of  
16 apoEV regulation of general HC and liver function, including but not limited to the age-related  
17 polyploidization process, the glucose/lipid metabolism and the protein/enzyme synthesis.

18 The eukaryotes possess an ancient and elaborate endomembrane system which is  
19 responsible for the biosynthesis and transport of proteins and lipids, as well as for the  
20 formation of major intracellular organelles (Field and Dacks, 2009). The endomembrane  
21 system is dynamically maintained by endosomal vesicular trafficking in a bi-directional mode:  
22 anterograde transport ends with exocytosis and retrograde transport starts with endocytosis,

1 while the Golgi serves as the crucial interface between these two processes (Johannes and  
2 Popoff, 2008; Lee et al., 2004). Interestingly, EVs, as products of endosomal or plasma  
3 membrane origin, also have close relationships with the endomembrane system for trafficking  
4 after internalization (Heusermann et al., 2016; Joshi et al., 2020). In a previous study, we have  
5 reported that apoEVs after engulfment regulate recipient lysosomal biogenesis by activating a  
6 master transcription factor (Liu et al., 2020). However, it remains unknown whether EVs or  
7 apoEVs directly integrate into recipient organelles with functional significance. In this study,  
8 we discovered that apoEVs assemble with recipient Golgi and are required for Golgi integrity,  
9 which adds new dimensions to the current knowledge in the following respects. First,  
10 homeostasis of an organelle or at least a part of the endomembrane system demands  
11 extrinsic EV inputs. Second, EVs can be integrally reused as necessary structural units for  
12 functional execution. Finally, the Golgi apparatus might actually be a chimeric organelle (or  
13 the AGC structure) in certain cells with physiological apoEV internalization. One mechanism  
14 revealed in this study is that apoEVs express v-SNAREs and apoEVs use VAMP3 to  
15 assemble with Golgi. According to current models, as far as we know, SNARE-mediated  
16 membrane contacts may end up with different outcomes, such as a full-collapse fusion or just  
17 a kiss-and-run mode of flicker fusion (Smith et al., 2008). Although VAMP3 functionally  
18 expresses on apoEVs for finding Golgi, how apoEVs work with Golgi will still be interesting to  
19 further examine. Whether other EVs also assemble with recipient organelles and whether  
20 apoEVs fuse with endosomes or other membranous organelles remain to be investigated. It is  
21 intriguing findings that Golgi integrity is required for liver homeostasis and that Golgi  
22 participates in liver regeneration, whereas loss of Golgi contributes to ALF progression.

1 Although the regulatory mechanisms of Golgi assembly and disassembly in organ health and  
2 sickness are not fully understood, the involvements of Golgi in stress responses and disease  
3 pathogenesis emerge to be noticed (Machamer, 2015; Sbodio et al., 2018). In this regard,  
4 apoEV infusion may serve as an effective approach to potentiate healthy Golgi for incoming  
5 functional requirements (e.g. in MHx) or rescue defective Golgi (e.g. in ALF). Moreover, as the  
6 Golgi apparatus performs multiple important functions such as protein sorting and  
7 modification (Lee et al., 2004), it would be significant to decipher the potential role of the Golgi  
8 as a cargo- or signaling-processing platform for internalized EVs, which might be linked to the  
9 undissected mechanisms apoEVs in promoting microtubule acetylation *via* the Golgi in this  
10 study.

11 To cope with a constant influx of noxious stimuli, the liver has developed a remarkable  
12 and tightly controlled regenerative capacity in response to parenchymal loss, which  
13 nevertheless can be impaired in severe or chronic injury settings (Forbes and Newsome,  
14 2016). Thus, liver disease is a primary cause of mortality and morbidity that is also rising  
15 globally (Williams et al., 2017). Currently, for end-stage liver disease or failure, the only clinical  
16 approach is liver transplantation, but availability is limited by several major challenges  
17 including a donor shortage (Stravitz and Lee, 2019). Therefore, there remains an unmet need  
18 to rescue patients from lethal liver injuries. In this study, on the basis of previous findings on  
19 apoptotic regulation of tissue regeneration (Brock et al., 2019; Li et al., 2010), we unraveled  
20 that infusion of allogeneic apoEVs significantly promotes liver regeneration after PHx and can  
21 serve as an effective therapeutic for ALF. ApoEV therapy holds great promise for translational  
22 applications, especially when the current antidote fails to work in late-stage ALF. Based on the

1 results of this study, we assume that by apoEVs promoting ploidy transition, the ROS  
2 toxicity-prone 4N-HCs are rapidly replaced by 2N-HCs for liver protection, while whether this  
3 is a form of action of detoxification or regeneration will be tricky to explain. It is notable that  
4 with translational advantages, therapeutic apoEVs can be easily obtained at a larger amount  
5 than Exos and without ultracentrifuge from cultured MSCs, which possess immense potential  
6 for regenerative and modulatory transplantation and have been used extensively in clinical  
7 trials for treating a variety of diseases (Galipeau and Sensebe, 2018). Furthermore, given the  
8 potential hepatotropic property of apoEVs, engineered chimeric apoEVs can be constructed  
9 for targeted delivery of therapeutic molecules or drugs, as we previously established (Dou et  
10 al., 2020), which might prove useful for treating complicated chronic diseases of the liver.  
11 Nevertheless, the application of apoEVs in treating liver diseases should also be cautious  
12 particularly considering that the polyploid state may play a tumor-suppressive role in the liver  
13 (Zhang et al., 2018a; Zhang et al., 2018b). Although that apoEVs are kind of safeguarding  
14 ploidy homeostasis of the liver without promoting diploid HCs over the physiological status,  
15 how apoEVs might balance the effects and risks remain elusive. Taken together, our findings  
16 open a window for future translational research on apoEVs to counteract diseases in the liver  
17 context.

18



## 1 **Acknowledgements**

2 This work was supported by grants from the Guangdong Financial Fund for High-Caliber  
3 Hospital Construction (174-2018-XMZC-0001-03-0125, D-07 to S.S., D-11 to X.K.), the Pearl  
4 River Talent Recruitment Program (2019ZT08Y485), the National Science and Technology  
5 Major Project of the Ministry of Science and Technology of China (2018ZX10302207-001-002),  
6 the Sun Yat-sen University Young Teacher Key Cultivation Project (18ykzd05 to X.K.), the  
7 National Natural Science Foundation of China (32000974 to B.S.), the Postdoctoral  
8 Innovative Talents Support Program of China (BX20190380 to B.S.), and the General  
9 Program of China Postdoctoral Science Foundation (2019M663986 to B.S.). We thank  
10 Alnylam's Bioinformatics, Oligo Synthesis, and RNAi Lead Discovery team for designing,  
11 generating, and screening for the AnIn GalNAc siRNAs. We thank Prof. Zhiying He in Tongji  
12 University for discussion on liver ploidy analysis. We thank Dr. Zijian Jiang in The Fourth  
13 Military Medical University for technical support on hepatectomy surgeries. We thank Dr.  
14 Allyson J Merrell and Prof. Ben Z Stanger in University of Pennsylvania for technical support  
15 on culture of primary HCs.

16

## 17 **Author contributions**

18 B.S. contributed to the study design and conduct, and the manuscript drafting. R.W.  
19 contributed to data acquisition, analysis and interpretation. C.C. and X.K. contributed to data  
20 analysis and interpretation. D.W. contributed to hepatectomy experiments. H.C.T. contributed  
21 to GalNAc-based hepatocyte ploidy manipulation. Y.W. contributed to the experimental design  
22 on Golgi apparatus. Y.L., O.J. and X.C. contributed to labeling of apoEVs by radionuclides.

1 H.L., R.T.K.K. and B.Z.T. contributed to labeling of apoEVs by the AIE luminogen. H.Y.  
2 contributed to design and interpretation of liver experiments. M.W. contributed to design and  
3 interpretation of ploidy experiments. L.X. and X.Y. contributed to apoEV identification and  
4 marker analysis. Y.F. contributed to apoptosis verification. X.Z., J.T. and L.M. contributed to  
5 data interpretation. L.L. contributed to mouse breeding and profiling. Y.J. and S.S. contributed  
6 to the project conception, experimental design and supervision. All authors contributed to the  
7 manuscript revision and approved the final version of the manuscript.

8

9 **Declaration of Interests**

10 The authors have declared that no conflict of interest exists.

11

1 **Figure legends**

2 **Figure 1. Circulatory apoptotic extracellular vesicles (apoEVs) engraft in the liver and**  
3 **safeguard liver homeostasis. (A)** Biodistribution of intravenously injected copper isotope  
4 ( $^{64}\text{Cu}$ )-labeled apoEVs. Mice underwent whole-body coronal positron emission tomography  
5 (PET) at indicated time points. Organs/tissues were dissected and measured for radiation  
6 intensity at 48 h. WAT, white adipose tissue; Lv., liver; Sp., spleen; Stm., stomach; Kid., kidney;  
7 L., lung; Bw., bowel; H., heart; Fm., femur. Scale bar = 10 mm.  $N = 4$  per organ/tissue. **(B)**  
8 Tracing of PKH26-labeled apoEVs (red) in the liver, counterstained with DAPI for detecting  
9 DNA (blue). ApoEVs were intravenously injected and liver samples were collected at indicated  
10 time points. After a single infusion, kinetic changes of apoEVs in the liver were obtained by  
11 fluorescent imaging analysis. The half-life of liver-engrafted apoEVs was calculated. Scale  
12 bars = 25  $\mu\text{m}$ .  $N = 6$  per time point. **(C)** Schematic diagram showing study design of apoEV  
13 infusion in *Fas* mutant (*Fas<sup>mut</sup>*) mice. ApoEVs were infused intravenously (*i.v.*) at a protein  
14 concentration of 5  $\mu\text{g/g}$ . **(D)** Flow cytometric analysis of Annexin V<sup>+</sup> liver tissue extracellular  
15 vesicles (apoEVs) with corresponding quantification. WT, wild type.  $N = 3$  per group. **(E)**  
16 Gross view images of liver and quantification of fasting liver weight (LW) to body weight (BW)  
17 ratio. Scale bars = 5 mm.  $N = 6$  per group. **(F)** Hematoxylin and eosin (H&E) staining of liver  
18 tissues in respective periportal vein (PV) and pericentral vein (CV) areas. Hepatic injury  
19 scores were examined based on pathological parameters. Scale bars = 50  $\mu\text{m}$ .  $N = 6$  per  
20 group. **(G)** Serum alanine aminotransferase (ALT) and aspartate aminotransferase (AST)  
21 levels were determined.  $N = 6$  per group. **(H)** Representative liver fluorescent images showing  
22 hepatocytes (HCs) with different numbers of nuclei (blue, DAPI for DNA) and their cell borders

1 (green, phalloidin for F-actin). # indicates binucleated HCs. Percentages of binucleated and  
2 mononucleated HCs were quantified. Scale bars = 25  $\mu$ m. *N* = 6 per group. **(I)** After propidium  
3 iodide (PI) staining, ploidy distribution of HCs (diploid, 2N; tetraploid, 4N; octoploid, 8N) was  
4 analyzed by flow cytometry. *N* = 3 per group. **(J)** Graphical summary demonstrating that  
5 apoEVs maintained liver homeostasis in apoptotic deficient conditions. Data represent mean  
6  $\pm$  standard deviation. \*, *P* < 0.05; \*\*, *P* < 0.01; \*\*\*, *P* < 0.0001. Statistical analyses were  
7 performed by one-way analysis of variance followed by the Newman-Keuls post hoc tests.

8

9 **Figure 2. Specialized internalization of apoEVs by hepatocytes (HCs) promotes ploidy**  
10 **transition. (A)** Tracing of PKH26-labeled (for membrane) or aggregation-induced emission  
11 luminogen (AIEgen, for mitochondria)-labeled apoEVs (red) in liver, with phalloidin staining  
12 F-actin (green) to show HC cell borders. DAPI was used for counterstaining DNA (blue).  
13 ApoEVs were intravenously injected and liver samples were collected 24 h after the infusion.  
14 Representative confocal images show binucleated HCs and the neighbored macrophages  
15 (M $\phi$ s). Flow cytometric analyses were performed on freshly isolated primary HCs to detect  
16 the fluorescent signals and determine percentages of apoEV-positive HCs. Scale bars = 10  
17  $\mu$ m. **(B)** Tracing of green fluorescent protein (GFP)-labeled particles (green) in liver of *Fas*  
18 mutant (*Fas<sup>mut</sup>*) mice, with phalloidin staining F-actin (red) to show borders of HC cells. DAPI  
19 was used for counterstaining DNA (blue). *Fas<sup>mut</sup>* mice and *GFP<sup>+/+</sup>* mice were  
20 connected to generate parabiosis model for 2 months. A representative confocal image shows  
21 a binucleated HC and a neighboring M $\phi$ . Scale bar = 10  $\mu$ m. **(C)** Representative fluorescent  
22 images showed apoEV surface exposure of desialylated residues including galactose (Gal)

1 and *N*-acetylgalactosamine (GalNAc). ApoEVs (labeled by CellMask™ Deep Red, red) were  
2 stained with FITC-conjugated lectins (green) specific for Gal or GalNAc binding and  
3 aggregation. Flow cytometric analysis was performed to determine percentages of apoEV  
4 staining. ApoEV exposure of GalNAc was compared to exosomes (Exos) or to apoEV source  
5 mesenchymal stem cells (MSCs) using fluorescent unit (FU, analyzed by a fluorescent reader)  
6 over membrane labeling (by CellMask™ Deep Red) FU ratio. Scale bars = 25  $\mu$ m. *N* = 3 per  
7 group. **(D)** Schematic diagram demonstrates the study design of apoEV uptake by primary  
8 cultured HCs. WEM, William's E Medium; BSA, bovine serum albumin; ASGPR,  
9 asialoglycoprotein receptor; ab, antibody. ApoEVs were treated at a protein concentration of  
10 10  $\mu$ g/ml. Gal and GalNAc were added together at 200 mM each, and antibodies were added  
11 at 5  $\mu$ g/ml. **(E)** Representative fluorescent images show PKH26-labeled apoEVs (red)  
12 uptaken by binucleated HCs (DAPI for DNA, blue). White dashed lines depict cell borders of  
13 cultured HCs. Flow cytometric analysis was performed to detect the fluorescent signals and  
14 determine the percentage of apoEV-positive HCs. Scale bars = 10  $\mu$ m. *N* = 5 per group. **(F)**  
15 Schematic diagram demonstrates the study design of HC ploidy transition. ApoEV protein  
16 concentration was 10  $\mu$ g/ml. Representative image shows complete cytokinesis, which is  
17 identified by the midbody structure formed by microtubules (MTs,  $\alpha$ -tubulin immunostaining,  
18 green; counterstained with DAPI, blue). Scale bar = 20  $\mu$ m. **(G)** Imaging analysis of complete  
19 cytokinesis events. WT, wild type. *N* = 4 per group. **(H)** After propidium iodide (PI) staining,  
20 ploidy distribution of HCs (diploid, 2N; tetraploid, 4N; octoploid, 8N) was analyzed by flow  
21 cytometry. *N* = 4 per group. **(I)** Schematic diagram demonstrating the study design of *in vivo*  
22 HC uptake or HC ploidy intervention upon apoEV infusion. ApoEVs were infused

1 intravenously (*i.v.*) at a protein concentration of 5 µg/g. GalNAc was injected subcutaneously  
2 (*s.c.*) at 500 mg/kg once per week to inhibit apoEV uptake by HCs. GalNAc-conjugated small  
3 interferon RNA (siRNA) against the *Anillin* gene (G-si*Anln*) for inhibiting HC cytokinesis or its  
4 luciferase control (G-si*Luc*) was injected at 4 µg/g. **(J)** Tracing of PKH26-labeled apoEVs (red)  
5 in the liver. DAPI was used for DNA counterstaining (blue). Scale bars = 25 µm. **(K)**  
6 Quantitative real-time polymerase chain reaction (qRT-PCR) analysis of *Anln* mRNA  
7 expression in freshly isolated HCs, liver non-parenchymal cells (NPCs) and splenocytes  
8 (SPCs) with *β-actin* as internal control. *N* = 3 per group. **(L)** Representative liver fluorescent  
9 images show HCs with different numbers of nuclei (blue, DAPI for DNA) and their cell borders  
10 (green, phalloidin for F-actin). # indicates binucleated HCs. Percentages of binucleated and  
11 mononucleated HCs were quantified. Scale bars = 25 µm. *N* = 5 per group. **(M)** After PI  
12 staining, ploidy distribution of HCs was analyzed by flow cytometry. *N* = 3 per group. **(N)**  
13 Hematoxylin and eosin (H&E) staining of liver tissues in periportal vein (PV) areas. Hepatic  
14 injury scores were assessed based on pathological parameters. Scale bars = 50 µm. *N* = 5  
15 per group. **(O)** Serum alanine aminotransferase (ALT) levels were determined. *N* = 5 per  
16 group. **(P)** Graphical summary demonstrates that apoEV uptake by HCs promotes ploidy  
17 transition for liver homeostasis. Data represent mean ± standard deviation. \*, *P* < 0.05; \*\*, *P* <  
18 0.01; \*\*\*, *P* < 0.0001; NS, not significant, *P* > 0.05. Statistical analyses were performed using  
19 Student's *t* test for two-group analysis or one-way analysis of variance followed by the  
20 Newman-Keuls post hoc tests for multiple group comparisons.

21

1 **Figure 3. ApoEVs interact with recipient Golgi apparatus to form a chimeric organelle**  
2 **complex. (A)** Left: Tracing of aggregation-induced emission luminogen (AIEgen)-labeled  
3 apoEVs (red) in liver, with Golgin84 immunostaining for Golgi apparatus (green) and  
4 counterstaining with DAPI (blue). ApoEVs were intravenously injected and liver samples were  
5 collected at 24 h after the infusion. Right: Tracing of green fluorescent protein (GFP)-labeled  
6 particles (green) in the liver of *Fas* mutant (*Fas<sup>mut</sup>*) mice, with Golgin84 immunostaining for  
7 Golgi apparatus (red) and counterstaining with DAPI (blue). *Fas<sup>mut</sup>* mice and *GFP* transgenic  
8 (*GFP<sup>+/+</sup>*) mice were connected as a parabiosis model for 2 months. Representative confocal  
9 images show binucleated HCs. Scale bars = 5  $\mu$ m. **(B)** Tracing of PKH26-labeled apoEVs (red)  
10 in sorted tetraploid HCs (4N-HCs), with Golgi apparatus being demonstrated by a plasmid of  
11 *N*-acetylgalactosaminyltransferase 2 (GALNT2)-GFP (green) and counterstaining with DAPI  
12 (blue). Representative 2D confocal images show binucleated HCs and 3D reconstructed  
13 images show apoEV contacting Golgi apparatus. Scale bars = 10  $\mu$ m (2D) and 500 nm (3D).  
14 **(C)** Representative fluorescent images show cultured 4N-HCs in interphase and in cytokinesis  
15 with GALNT2-GFP-labeled Golgi (green), PKH26-labeled apoEVs (red), DAPI counterstain  
16 (blue), and ac- $\alpha$ -tubulin immunostaining for acetylated microtubules (MTs, white). Scale bars  
17 = 10  $\mu$ m. **(D)** Representative fluorescent images show cultured 4N-HCs with  
18 GALNT2-GFP-labeled Golgi (green, up) or 130 kDa Golgi matrix protein (GM130)  
19 immunofluorescent (IF) staining (green, down), PKH26-labeled apoEVs (red), and DAPI  
20 counterstain (blue). Imaging analysis was performed to quantify HC percentages with Golgi  
21 fragmentation and Golgi with apoEV fluorescence intensity. WT, wild type. Scale bars = 5  $\mu$ m.  
22 *N* = 4 per group. **(E)** Schematic diagram demonstrates the study design for investigating

1 apoEV-Golgi assimilation. Representative fluorescent images show cultured 4N-HCs with  
2 their own Golgi proteins (green) and apoEV-transferred Golgi proteins (red) with DAPI  
3 counterstain (blue). GRASP55, Golgi reassembly-stacking protein 55; GalT,  
4 galactosyltransferase. Scale bars = 5  $\mu\text{m}$ . **(F)** Western blot analysis shows multiple Golgi  
5 protein expression in apoEVs compared to their source MSCs, and in cultured HCs. TGN38,  
6 *trans*-Golgi network protein 38; Stx5, syntaxin 5; GAPDH, glyceraldehyde 3-phosphate  
7 dehydrogenase. **(G)** Representative transmission electron microscopy (TEM) images show  
8 Golgi ultrastructure in sorted 4N-HCs. Distinguishable Golgi stacks per cell were quantified.  
9 Scale bars = 200 nm.  $N = 4$  per group. **(H)** Golgi apparatus was isolated from cultured HCs  
10 and Golgi protein mass was determined using the BCA method.  $N = 4$  per group. **(I)** Western  
11 blot analysis showed GFP expression, MT and acetylated MT markers in isolated Golgi.  
12 ApoEVs were derived from *GFP<sup>+/+</sup>* MSCs. GM130 was used as an internal control. **(J)**  
13 Representative fluorescent images show cultured 4N-HCs with ac- $\alpha$ -tubulin immunostaining  
14 for acetylated MTs (white), GALNT2-GFP-labeled Golgi (green), PKH26-labeled apoEVs (red),  
15 and DAPI counterstain (blue). Imaging analysis was performed to quantify acetylated MTs  
16 fluorescence intensity and complete cytokinesis events. Ctrl, control; BFA, Brefeldin A, added  
17 at 1 nM. Scale bars = 5  $\mu\text{m}$ .  $N = 4$  per group. **(K)** Western blot analysis show MT and  
18 expression of multiple mitosis proteins in cultured HCs. INCENP, inner centromere protein;  
19 MKLP1, mitotic kinesin-like protein 1; RacGAP1, Rac GTPase-activating protein 1; RhoA, Ras  
20 homolog family member A. **(L)** After propidium iodide (PI) staining, ploidy distribution in HCs  
21 (diploid, 2N; tetraploid, 4N; octoploid, 8N) was analyzed by flow cytometry.  $N = 4$  per group.  
22 **(M)** Graphical summary demonstrating apoEV assembly with Golgi to safeguard HC



1 cytokinesis. Data represent mean  $\pm$  standard deviation. \*\*,  $P < 0.01$ ; \*\*\*,  $P < 0.0001$ .  
2 Statistical analyses were performed by Student's  $t$  test for two-group analysis or one-way  
3 analysis of variance followed by the Newman-Keuls post hoc tests for multiple group  
4 comparisons.

5

6 **Figure 4. ApoEVs use vesicle-associated membrane protein 3 (VAMP3) to assemble**

7 **with Golgi. (A)** Representative immunofluorescent images show apoEV (labeled with

8 CellMask™ Deep Red, red) surface expression of vesicle-localized-soluble

9 *N*-ethylmaleimide-sensitive factor attachment protein receptors (v-SNAREs, green) VAMP3, V

10 VAMP4 and Golgi SNARE of 15 kDa (GS15). Flow cytometric analysis was performed to

11 determine percentages of positively stained apoEVs. Scale bars = 25  $\mu$ m. **(B)** Western blot

12 analysis show expression of VAMPs in apoEVs compared to their source MSCs. **(C)** Western

13 blot analysis show expression of VAMPs in apoEVs. Source MSCs were transfected with

14 small interferon RNAs (siRNAs) as a negative control (siCtrl) for VAMP3 (si*Vamp3*), VAMP4

15 (si*Vamp4*), and both VAMP3 and VAMP4 (si*Vamp3/4*). Flow cytometric analysis was

16 performed to determine percentages of positively stained apoEVs after knockdown of VAMPs.

17 **(D)** Representative images show cultured *Fas* mutant (*Fas<sup>mut</sup>*) tetraploid hepatocytes

18 (4N-HCs) with 130 kDa Golgi matrix protein (GM130) immunofluorescent staining (green),

19 PKH26-labeled apoEVs (red), and DAPI counterstain (blue). White dashed lines depict cell

20 borders of cultured HCs. Imaging analysis was performed to quantify apoEV uptake and

21 percentages of Golgi-contacted apoEVs. Scale bars = 10  $\mu$ m.  $N = 4$  per group. **(E)**

22 Representative fluorescent images show cultured *Fas<sup>mut</sup>* 4N-HCs with ac- $\alpha$ -tubulin

1 immunostaining (white), *N*-acetylgalactosaminyltransferase 2 (GALNT2)-GFP-labeled Golgi  
2 (green), PKH26-labeled apoEVs (red), and DAPI counterstain (blue). Imaging analysis was  
3 performed to quantify HC percentages with Golgi fragmentation and acetylated microtubules  
4 (MTs) fluorescence intensity. Scale bars = 5  $\mu$ m. *N* = 4 per group. **(F)** Western blot analysis  
5 showed human VAMP3 (hVAMP3) expression in isolated HC Golgi. ApoEVs were derived  
6 from human MSCs (hApoEVs). GM130 was used as an internal control. **(G)** Western blot  
7 analysis showed VAMP3 expression in apoEVs without or with treatment by 250 ng/ml  
8 Tetanus toxin (TeNT). **(H)** Representative Golgin84 immunofluorescent staining (green)  
9 images of liver Golgi counterstained with DAPI (blue). WT, wild type. Imaging analyses were  
10 performed to quantify HC percentages with Golgi fragmentation. Scale bars = 5  $\mu$ m. *N* = 4 per  
11 group. **(I)** Golgi apparatus was isolated from the liver and Golgi protein mass was determined  
12 using the BCA method. *N* = 4 per group. **(J)** Representative liver fluorescent images showed  
13 HCs with different nuclei (blue, DAPI for DNA) and their cell borders (green, phalloidin for  
14 F-actin). # indicates binucleated HCs. Scale bars = 25  $\mu$ m. *N* = 4 per group. **(K)** After PI  
15 staining, percentages of binucleated HCs were quantified. Diploid HCs (2N-HCs) were  
16 analyzed using flow cytometry. *N* = 4 per group. **(L)** Hematoxylin and eosin (H&E) staining of  
17 liver tissues in periportal vein (PV) areas. Hepatic injury scores were examined based on  
18 pathological parameters. Scale bars = 50  $\mu$ m. *N* = 4 per group. **(M)** Serum alanine  
19 aminotransferase (ALT) levels were determined. *N* = 4 per group. **(N)** Graphical summary  
20 illustrating that apoEVs use VAMP3 to assemble with Golgi for HC and liver regulation. Data  
21 represent mean  $\pm$  standard deviation. \*, *P* < 0.05; \*\*, *P* < 0.01; \*\*\*, *P* < 0.0001; NS, not  
22 significant, *P* > 0.05. Statistical analyses were performed by Student's *t* test for two-group

1 analysis or one-way analysis of variance followed by the Newman-Keuls post hoc tests for  
2 multiple group comparisons.

3

4 **Figure 5. ApoEV-mediated Golgi recovery and ploidy reversal contribute to liver**

5 **regeneration. (A)** Schematic diagram demonstrates the study design of 70% partial

6 hepatectomy (PHx). **(B)** Gross view images of liver and quantification of liver weight (LW) to

7 body weight (BW) ratio after recovery for 72 h. Scale bars = 5 mm.  $N = 5$  per group. **(C)** Flow

8 cytometric analysis showed Annexin V<sup>+</sup> liver tissue extracellular vesicles (apoEVs) and

9 corresponding quantification.  $N = 3$  per group. **(D)** Representative Golgin84

10 immunofluorescent staining (green) images of liver Golgi counterstained with DAPI (blue).

11 Imaging analysis was performed to quantify Golgi area percentages. Scale bars = 5  $\mu$ m.  $N = 4$

12 per group. **(E)** Representative liver fluorescent images show hepatocytes (HCs) with different

13 numbers of nuclei (blue, DAPI for DNA) and their cell borders (green, phalloidin for F-actin). #

14 indicates binucleated HCs. Percentages of binucleated HCs were accordingly quantified.

15 Scale bars = 25  $\mu$ m.  $N = 4$  per group. **(F)** Schematic diagram demonstrates the study design

16 of 80% massive hepatectomy (MHx) therapy. ApoEVs at a protein concentration of 5  $\mu$ g/g

17 were infused intravenously (*i.v.*) alone or after administration of 250 ng/ml Tetanus toxin

18 (TeNT). **(G)** Kaplan-Meier survival curve of MHx mice.  $N = 10$  per group. **(H)** Gross view

19 images of the liver and quantification of LW/BW ratio after recovery for 48 h. Scale bars = 5

20 mm.  $N = 5$  per group. **(I)** Representative Golgin84 immunofluorescent staining (green) images

21 of liver Golgi counterstained with DAPI (blue). Imaging analysis was performed to quantify

22 Golgi area percentages. Scale bars = 5  $\mu$ m.  $N = 4$  per group. **(J)** Representative liver

1 fluorescent images show HCs with different numbers of nuclei (blue, DAPI for DNA) and their  
2 cell borders (green, phalloidin for F-actin). # indicates binucleated HCs. Percentages of  
3 binucleated HCs were quantified. Scale bars = 25  $\mu$ m.  $N = 4$  per group. **(K)** Graphical  
4 summary demonstrates apoEVs promote Golgi recovery and ploidy reversal for liver  
5 regeneration. Data represent mean  $\pm$  standard deviation. \*,  $P < 0.05$ ; \*\*,  $P < 0.01$ ; \*\*\*,  $P <$   
6 0.0001. Statistical analyses were performed by Student's  $t$  test for two-group analysis or  
7 one-way analysis of variance followed by the Newman-Keuls post hoc tests for multiple group  
8 comparisons.

9

10 **Figure 6. ApoEVs protect against acute acetaminophen (APAP)-induced liver failure**  
11 **through Golgi and ploidy restorations. (A)** Schematic diagram demonstrates the study  
12 design of APAP-induced acute liver failure (ALF). APAP was injected intraperitoneally (*i.p.*) at  
13 1 g/kg. **(B)** Hematoxylin and eosin (H&E) staining of liver tissues. Hepatic injury scores were  
14 examined based on pathological parameters. Ctrl, control. Scale bars = 100  $\mu$ m.  $N = 5$  per  
15 group. **(C)** Serum alanine aminotransferase (ALT) levels were determined.  $N = 5$  per group.  
16 **(D)** Flow cytometric analysis of Annexin V<sup>+</sup> liver tissue extracellular vesicles (apoEVs) and  
17 corresponding quantification.  $N = 3$  per group. **(E)** Representative Golgin84  
18 immunofluorescent staining (green) images of liver Golgi counterstained with DAPI (blue).  
19 Imaging analysis was performed to quantify Golgi area percentages. Scale bars = 5  $\mu$ m.  $N = 4$   
20 per group. **(F)** Representative liver fluorescent images show hepatocytes (HCs) with different  
21 numbers of nuclei (blue, DAPI for DNA) and their cell borders (green, phalloidin for F-actin). #  
22 indicates binucleated HCs. Percentages of binucleated HCs were quantified. Scale bars = 25

1  $\mu\text{m}$ .  $N = 5$  per group. **(G)** Schematic diagram demonstrates the study design of ALF therapy.  
2 APAP was injected *i.p.* at 1 g/kg. ApoEVs at protein quantification of 5  $\mu\text{g/g}$  were infused  
3 intravenously (*i.v.*) with or without 250 ng/ml Tetanus toxin (TeNT). The antioxidant *N*-acetyl  
4 L-cysteine (NAC) was injected *i.p.* at 1 g/kg. **(H)** H&E staining of liver tissues. Hepatic injury  
5 scores were examined based on pathological parameters. Scale bars = 100  $\mu\text{m}$ .  $N = 5$  per  
6 group. **(I)** Kaplan-Meier survival curve of ALF mice.  $N = 10$  per group. **(J)** Representative  
7 Golgin84 immunofluorescent staining (green) images of liver Golgi counterstained with DAPI  
8 (blue). Imaging analysis was performed to quantify Golgi area percentages. Scale bars = 5  
9  $\mu\text{m}$ .  $N = 4$  per group. **(K)** Representative liver fluorescent images show HCs with different  
10 numbers of nuclei (blue, DAPI for DNA) and their cell borders (green, phalloidin for F-actin). #  
11 indicates binucleated HCs. Percentages of binucleated HCs were quantified. Scale bars = 25  
12  $\mu\text{m}$ .  $N = 4$  per group. **(L)** Percentages of apoptotic HCs were quantified by terminal  
13 deoxynucleotidyl transferase-mediated dUTP nick-end labeling (TUNEL) staining.  $N = 4$  per  
14 group. **(M)** Graphical summary demonstrates apoEV infusion promotes HC recovery for ALF  
15 therapy. Data represent mean  $\pm$  standard deviation. \*,  $P < 0.05$ ; \*\*,  $P < 0.01$ ; \*\*\*,  $P < 0.0001$ ;  
16 NS, not significant,  $P > 0.05$ . Statistical analyses were performed by Student's *t* test for  
17 two-group analysis, one-way analysis of variance followed by the Newman-Keuls post hoc  
18 tests for multiple group comparisons, or the Log-rank test for survival curve comparisons.

19

1     **METHODS**

2     **LEAD CONTACT AND MATERIALS AVAILABILITY**

3     Further information and requests for resources and reagents should be directed to and will be  
4     fulfilled by the Lead Contact, Songtao Shi (songtaos@upenn.edu).

5

6     **METHOD DETAILS**

7     **Animals**

8     The following mouse strains were obtained from the Jackson Laboratory: *Fas<sup>mut</sup>*  
9     (B6.MRL-*Fas<sup>lpr</sup>*/J, JAX# 000482), *Casp3<sup>-/-</sup>* (B6N.129S1-*Casp3<sup>tm1Flv</sup>*/J, JAX# 006233, provided  
10    as heterozygotes), *GFP<sup>+/+</sup>* (C57BL/6-Tg(CAG-EGFP)1Os/J, JAX# 003291), and C57BL/6J  
11    (JAX# 000664) as the WT (Liu et al., 2018). Male mice at ages of 8 or 12 weeks were used.  
12    All mice were housed in pathogen-free conditions, maintained on a standard 12-h light-dark  
13    cycle, and received food and water *ad libitum*. Genotyping was performed by polymerase  
14    chain reaction (PCR) using tail samples from mice and primer sequences provided by the  
15    Jackson Laboratory. All animal experiments were performed in compliance with the relevant  
16    laws, institutional guidelines and ARRIVE guidelines.

17

18    **Reagents**

19    All antibodies, chemicals, cytokines and plasmids used in this study are listed in the Key  
20    Resources Table (Table S1).

21

22    **Isolation and culture of MSCs**

1 Mouse MSCs were isolated from hind limb bone marrow and cultured, as we previously  
2 described (Liu et al., 2018). Briefly, a single suspension of bone marrow cells was seeded at a  
3 density of  $1.5 \times 10^7$  cells per 10 cm culture dish at 37°C in 5% CO<sub>2</sub>. Non-adherent cells were  
4 removed after 24 h and attached cells were maintained for 16 days in alpha-Minimum  
5 Essential Medium (α-MEM) (12571-048, Invitrogen, USA) supplemented with 20% fetal  
6 bovine serum (FBS) (17L624, Sigma-Aldrich, USA), 2 mM L-glutamine (35050-061, Invitrogen,  
7 USA), 55 μM 2-mercaptoethanol (21985-023, Invitrogen, USA), 100 U/ml penicillin  
8 (15140-122, Invitrogen, USA) and 100 μg/ml streptomycin (15140-122, Invitrogen, USA).  
9 Colony-forming attached cells were passed twice by trypsin (12605-010, Invitrogen, USA) for  
10 further experimental use.

11 Human MSCs were isolated from full-term umbilical cords and cultured, as we previously  
12 described (Sun et al., 2010). Briefly, fresh umbilical cords were obtained from informed,  
13 healthy mothers in local maternity hospitals of China after normal deliveries and were  
14 processed under sterile conditions. The cords were rinsed twice in phosphate buffered saline  
15 (PBS) in penicillin and streptomycin, and outer membrane and vessels were removed. The  
16 washed cords were then cut into 1 mm<sup>2</sup> pieces and incubated in low-glucose Dulbecco's  
17 modified Eagle's medium (DMEM) (11885-084, Invitrogen, USA) containing 10% FBS  
18 (S12450, Atlanta Biologicals, USA), 2 mM L-glutamine (35050-061, Invitrogen, USA), 100  
19 U/ml penicillin (15140-122, Invitrogen, USA) and 100 μg/ml streptomycin (15140-122,  
20 Invitrogen, USA) at 37°C in a humidified atmosphere of 5% CO<sub>2</sub>. Colony-forming attached  
21 cells were passed by trypsin (12605-010, Invitrogen, USA) for further experimental use.

22

## 1 **Isolation and culture of T lymphocytes**

2 Mouse T cells were derived from spleen and cultured, as we previously described (Sui et al.,  
3 2017). Briefly, with ACK Lysing Buffer (10-548E, Lonza Bioscience, Switzerland) was used to  
4 remove red blood cells. T cells were isolated and stimulated for 48 h with 3 µg/ml plate-bound  
5 anti-mouse CD3 antibody (100340, BioLegend, USA) and 2 µg/ml soluble anti-mouse CD28  
6 antibody (102116, BioLegend, USA) in RPMI 1640 medium (21870-076, Invitrogen, USA)  
7 supplemented with 10% FBS (17L624, Sigma-Aldrich, USA), 2 mM L-glutamine (35050-061,  
8 Invitrogen, USA), 100 U/mL penicillin (15140-122, Invitrogen, USA), and 100 g/ml  
9 streptomycin (15140-122, Invitrogen, USA) at 37°C in a humidified atmosphere of 5% CO<sub>2</sub>.

10

## 11 **Culture of the cell line**

12 NIH/3T3 cell line was purchased from ATCC and was maintained in low-glucose DMEM  
13 (11885-084, Invitrogen, USA) supplemented with 10% FBS (17L624, Sigma-Aldrich, USA), 2  
14 mM L-glutamine (35050-061, Invitrogen, USA), 100 U/ml penicillin (15140-122, Invitrogen,  
15 USA) and 100 µg/ml streptomycin (15140-122, Invitrogen, USA) at 37°C in a humidified  
16 atmosphere of 5% CO<sub>2</sub>.

17

## 18 **Induction and examination of apoptosis**

19 Apoptosis was induced by multiple methods in this study. To induce cell apoptosis *via* both  
20 caspase-dependent and caspase-independent pathways, as we previously established (Liu et  
21 al., 2018), STS (ALX-380-014, Enzo Life Sciences, USA) was added to serum-free medium at  
22 500 nM for 16 h. For oxidative stress-induced apoptosis, as we previously established with



1 minor modifications (Zheng et al., 2018), mitochondrial photodynamic activation was  
2 performed on AIEgen-stained cells in serum-free conditions with ultralow-power light  
3 irradiation at 0.7 mW/cm<sup>2</sup> for 6 h. To initiate apoptosis *via* the intrinsic pathway, as reported  
4 (Medina et al., 2020), the BH3-mimetic ABT-737 (T2099, TargetMol, USA) which directly  
5 induces permeabilization of the mitochondrial outer membrane was applied at 5 μM for 48 h.  
6 To initiate apoptosis *via* the extrinsic pathway, as previously reported (Medina et al., 2020), T  
7 cells were treated with the CD95/Fas antibody (152803, BioLegend, USA) at 5 μg/ml for  
8 Fas-crosslinking during the 48 h activation. Apoptosis was identified by TUNEL (G3250,  
9 Promega, USA) or Annexin V (BMS500FI-300, Invitrogen, USA) / 7AAD (559925, BD  
10 Pharmingen, USA) staining.

11

## 12 **Isolation, treatment and infusion of apoEVs**

13 ApoEVs were isolated from medium of apoptotic cells using a sequential centrifugation  
14 method followed by filtering, as we previously established with modifications (Liu et al., 2018).  
15 Briefly, after sequential centrifugation at 800 g for 10 min at 4°C and 2,000 g for 10 min at 4°C  
16 followed by filtering through 5 μm filters, apoptotic cell lysates and debris were removed. Then,  
17 apoEVs were pelleted by centrifugation at 16,000 g for 30 min at 4°C and were diluted in PBS.  
18 Quantification of apoEVs was performed using the nanoparticle tracking analysis (NTA) for  
19 particle numbers and the BCA method (23225, Thermo Scientific, USA) for protein amounts.  
20 For treatment of HCs, apoEVs were added to the culture medium at a protein concentration of  
21 10 μg/ml, with the dosage being determined according to preliminary tests. For intravenous  
22 infusion, apoEVs in PBS were injected *via* the mouse caudal vein at a protein concentration of

1 5 µg/g. For TeNT treatment of apoEVs to cleave VAMP3, TeNT (582243, Merck Millipore,  
2 Germany) was added to the apoEV solution at 250 ng/ml and incubated at 37°C for 30 min.  
3 ApoEVs were then centrifuged at 16,000 g for 30 min and washed twice with PBS before  
4 resuspension.

5

## 6 **Labeling of apoEVs**

7 ApoEVs were labeled using multiple methods in this study. <sup>64</sup>Cu radionucleotide labeling of  
8 apoEVs was performed based on modifying our previous method of labeling of liposomes  
9 (Sun et al., 2017). Briefly, apoEVs were pelleted and resuspended in metal-free Na<sub>2</sub>HPO<sub>4</sub>  
10 solution (pH = 7.5), into which NOTA-NHS ester (C100, CheMatech, France), a metal chelator,  
11 was added at 150 nM and incubated at 4°C overnight. Purification of the conjugated apoEVs  
12 was performed by centrifugation and washed with the Na<sub>2</sub>HPO<sub>4</sub> solution. <sup>64</sup>Cu labeling was  
13 performed by adding 20-30 mCi <sup>64</sup>CuCl<sub>2</sub> and the mixture was shaken at 37°C for 30 min  
14 followed by purification. The labeling efficiency was confirmed by instant thin-layer  
15 chromatography (ITLC) plates with citric acid (0.1 M, pH = 5) as an eluent. For labeling of  
16 apoEVs by membrane dyes, either PKH26 (PKH26PCL, Sigma-Aldrich, USA) or CellMask™  
17 Deep Red (C10046, Invitrogen, USA) was used according to the manufacturers' instructions.  
18 For labeling of apoEVs by the AIEgen, DCPy was synthesized according to our established  
19 protocol (Zheng et al., 2020). DCPy was then added to serum-free cell culture medium at a  
20 final concentration of 5 µM and incubated for 30 min followed by washes. Cells were then  
21 induced apoptosis by light irradiation, as stated above.

22

## 1 **Isolation of Exosomes**

2 Exosomes (Exos) were isolated from cultured un-apoptotic cells according to previous  
3 protocols with minor modifications (Liu et al., 2015). Briefly, cells were cultured in  
4 Exo-depleted medium (complete medium depleted of FBS-derived Exos by overnight  
5 centrifugation at 120,000 g) for 48 h. Exos from culture supernatants were isolated by  
6 differential centrifugation: 800 g for 10 min, 2,000 g for 10 min, 16,000 g for 30 min and  
7 120,000 g for 120 min. Quantification of Exos was performed using the BCA method (23225,  
8 Thermo Scientific, USA) for protein amounts.

9

## 10 **Isolation, sorting, culture and ploidy transition of primary HCs**

11 Isolation of primary mouse HCs was performed according to previous protocols with minor  
12 modifications (Li et al., 2016). Briefly, mouse liver was perfused *via* catheterization of the  
13 portal vein using a 24G needle catheter (381212, BD, USA) and a mini-pump machine  
14 (13-876-2, Thermo Fisher, USA) under general anesthesia. The liver was perfused firstly with  
15 10 ml Hank's balanced salt solution (HBSS) (14175-079, Invitrogen, USA) to remove blood  
16 followed by 20 ml HBSS supplemented with 1 mM ethylene  
17 glycolbis(aminoethylether)-tetra-acetic acid (EGTA) (E3889, Sigma-Aldrich, USA) to remove  
18 the endogenous calcium. Then the liver was perfused with 20 ml HBSS supplemented with 5  
19 mM  $\text{CaCl}_2$  (223506, Sigma-Aldrich, USA) and 40  $\mu\text{g/ml}$  liberase TM (LIBTM-RO,  
20 Sigma-Aldrich, USA) for digestion. All the solutions were kept at 37°C in a water bath. After  
21 digestion, the liver was dissected and washed in ice-chilled HBSS, and cells were teased out  
22 into high-glucose DMEM (11965-084, Invitrogen, USA) supplemented with 10% FBS (17L624,

1 Sigma-Aldrich, USA), 100 U/ml penicillin (15140-122, Invitrogen, USA) and 100 µg/ml  
2 streptomycin (15140-122, Invitrogen, USA). HCs were then prepared by centrifugation at 50 g  
3 for 5 min at 4°C, filtered through 70 µm nylon strainers, purified by a 49% Percoll solution  
4 (P4937, Sigma-Aldrich, USA), and resuspended in William's E Medium (WEM) with  
5 GlutaMAX™ (32551-087, Invitrogen, USA) containing 10% FBS (17L624, Sigma-Aldrich,  
6 USA), 10 nM dexamethasone (D4902, Invitrogen, USA), 100 U/ml penicillin (15140-122,  
7 Invitrogen, USA) and 100 µg/ml streptomycin (15140-122, Invitrogen, USA). HCs were then  
8 seeded onto collagen-coated dishes (354450, Corning, USA) or coverslips (72295-14,  
9 Electron Microscopy Sciences, USA) and incubated at 37°C in a humidified atmosphere of 5%  
10 CO<sub>2</sub> for 3 h for attachment.

11 For sorting of primary HCs, according to the published protocol (Duncan et al., 2010),  
12 isolated HCs before seeding were resuspended at 2×10<sup>6</sup>/ml for 30 min at 37°C in  
13 high-glucose DMEM (11965-084, Invitrogen, USA) supplemented with 10% FBS (17L624,  
14 Sigma-Aldrich, USA), 10 mM Hydroxyethyl piperazineethanesulfonic acid (HEPES) (H4034,  
15 Sigma-Aldrich, USA), 15 µg/ml Hoechst 33342 (H3570, Invitrogen, USA) and 5 µM reserpine  
16 (R0875, Sigma-Aldrich, USA). The HCs were then sorted for diploid and tetraploid HCs by  
17 flow cytometry and were collected in high-glucose DMEM (11965-084, Invitrogen, USA)  
18 supplemented with 50% FBS (17L624, Sigma-Aldrich, USA) and 10 mM HEPES (H4034,  
19 Sigma-Aldrich, USA). Sorted HCs were pelleted by centrifugation, resuspended and seeded  
20 in WEM with GlutaMAX™ (32551-087, Invitrogen, USA) containing 10% FBS (17L624,  
21 Sigma-Aldrich, USA), 10 nM dexamethasone (D4902, Invitrogen, USA), 100 U/ml penicillin  
22 (15140-122, Invitrogen, USA) and 100 µg/ml streptomycin (15140-122, Invitrogen, USA).

1 For apoEV uptake assays in HC culture, after attachment, HCs were washed twice with  
2 HBSS (14175-079, Invitrogen, USA) and medium was changed to WEM with GlutaMAX™  
3 (32551-087, Invitrogen, USA) containing 0.2% bovine serum albumin (BSA) (700-100P,  
4 Gemini Bio, USA), 100 U/ml penicillin (15140-122, Invitrogen, USA) and 100 µg/ml  
5 streptomycin (15140-122, Invitrogen, USA) for following experiments (Li et al., 2016). ApoEVs  
6 were added at a protein concentration of 10 µg/ml for 24 h, during which 200 mM Gal (G5388,  
7 Sigma-Aldrich, USA) together with 200 mM GalNAc (HY-33212, MedChemExpress, China),  
8 or 5 µg/ml antibody for ASGPR (sc-166633, Santa Cruz Biotechnology, USA) or its isotype,  
9 were added to inhibit sugar recognition, as stated previously with minor modifications  
10 (McVicker et al., 2002).

11 Ploidy transition of cultured HCs was induced in a defined SUM3 medium (Duncan et al.,  
12 2010). SUM3 medium was prepared with 75% high-glucose DMEM (11965-084, Invitrogen,  
13 USA), 25% Waymouth's medium (11220-035, Invitrogen, USA), 2 mM L-glutamine  
14 (35050-061, Invitrogen, USA), 100 U/ml penicillin (15140-122, Invitrogen, USA), 100 µg/ml  
15 streptomycin (15140-122, Invitrogen, USA), 10 mM HEPES (H4034, Sigma-Aldrich, USA), 50  
16 ng/ml epidermal growth factor (EGF) (E4127, Sigma-Aldrich, USA), 1 µg/ml insulin (I0516,  
17 Sigma-Aldrich, USA), 30 nM sodium selenite (S5261, Sigma-Aldrich, USA), 10 µg/ml  
18 transferrin (T8158, Sigma-Aldrich, USA), 50 ng/ml somatotropin (869008-M, Sigma-Aldrich,  
19 USA) and 1 µM liothyronine (T<sub>3</sub>) (16028, Cayman Chemical, USA). After attachment, sorted  
20 4N-HCs were washed twice with HBSS and medium was changed to the SUM3 medium,  
21 which was refreshed each day for 5 days. According to a protocol established through  
22 previous observations (Duncan et al., 2010; Fortier et al., 2017), cytokinesis was analyzed at

1 72 h by counting the microtubule midbody events, and ploidy status was analyzed at 120 h  
2 after collection by trypsin (12605-010, Invitrogen, USA). ApoEVs were added at a protein  
3 concentration of 10 µg/ml, and BFA (11861, Cayman Chemical, USA) was applied at 1 nM.

4

#### 5 **Isolation of liver NPCs, PBMNCs and BMMNCs**

6 For isolation of liver NPCs, after liberase perfusion and cell collection, liver cells were  
7 centrifuged at 50 g for 5 min at 4°C to remove HCs, and the supernatant was centrifuged at  
8 500 g for 5 min at 4°C to pellet NPCs. For PBMNC isolation, whole peripheral blood was  
9 extracted from the mouse retro-orbital venous plexus, and cells were isolated by  
10 centrifugation at 500 g for 5 min at 4°C followed by being treated with ACK Lysing Buffer  
11 (10-548E, Lonza Bioscience, Switzerland) to remove red blood cells. After washing with PBS,  
12 PBMNCs were collected by centrifugation at 500 g for 5 min at 4°C. For BMMNC isolation,  
13 whole bone marrow cells were treated with ACK Lysing Buffer (10-548E, Lonza Bioscience,  
14 Switzerland), washed with PBS, and collected by centrifugation at 500 g for 5 min at 4°C.

15

#### 16 **Isolation of liver tissue EVs and quantification**

17 Liver tissue EV isolation was performed according to a previous protocol with modifications  
18 (Ishiguro et al., 2019). Briefly, after liberase perfusion and tissue collection, HCs were  
19 removed by centrifugation at 50 g for 5 min at 4°C, and the supernatant was centrifuged at  
20 500 g for 5 min at 4°C to pellet NPCs. The supernatant of this step was further centrifuged at  
21 2,000 g for 10 min at 4°C to remove tissue debris, filtered through 5 µm filters, and centrifuged  
22 at 16,000 g for 30 min at 4°C to pellet EVs. Quantifications of liver tissue EVs were performed

1 using the NTA for particle numbers and apoEVs were detected by Annexin V-APC labeling  
2 (640920, BioLegend, USA).

3

#### 4 **Transfection of plasmids and siRNAs**

5 Transfection of plasmids and siRNAs was performed according to our previous experience  
6 (Liu et al., 2018). A CellLight<sup>®</sup> Reagent based on a GALNT2 (Golgi-resident enzyme) plasmid  
7 for labeling of Golgi apparatus was used according to the manufacturer's instructions  
8 (C10592, Invitrogen, USA). The reagent was added to HCs at  $5 \times 10^6$  particles/ml at the time of  
9 medium change after attachment for 24 h incubation. GRASP55-mCherry and  
10 GRASP55-EGFP plasmids were used as previously described (Xiang and Wang, 2010;  
11 Zhang et al., 2018c). GalT-mCherry (87327, Addgene, USA) and GalT-EGFP (11929,  
12 Addgene, USA) plasmids were purchased. HCs were transfected with GRASP and GalT  
13 plasmids at 1  $\mu$ g/ml using the Lipofectamine<sup>™</sup> LTX Reagent with PLUS<sup>™</sup> Reagent  
14 (15338-100, Invitrogen, USA) at the time of medium change for 24 h incubation. siRNAs for  
15 mouse VAMP3 (sc-41339, Santa Cruz Biotechnology, USA) and VAMP4 (sc-61767, Santa  
16 Cruz Biotechnology, USA) were purchased, with non-targeting siRNA being used as the  
17 negative control. MSCs were incubated in Opti-MEM for 6 h (31985-070, Invitrogen, USA) and  
18 were transfected with siRNAs at 50 nM for 48 h using the Lipofectamine<sup>™</sup> RNAiMAX Reagent  
19 (13778-100, Invitrogen, USA).

20

#### 21 **GalNAc and GalNAc-conjugated siRNA experiments**

22 For *in vivo* experiments, GalNAc (HY-33212, MedChemExpress, China) was injected

1 subcutaneously at 500 mg/kg once per week. GalNAc-conjugated siRNAs were obtained from  
2 Alnylam Pharmaceuticals, USA, as 10 mg/ml stocks for G-si*Luc* and G-si*Anln*, as previously  
3 reported (Zhang et al., 2018a; Zhang et al., 2018b). The working concentrations of the  
4 siRNAs were 4 mg/ml diluted in PBS, and they were subcutaneously injected at 4 mg/kg once  
5 per week.

6

### 7 **PHx surgeries**

8 The PHx procedure was performed under sterile conditions by methods described previously  
9 (Hori et al., 2011; Mitchell and Willenbring, 2008). Isoflurane inhalation (R500IP, RWD Life  
10 Science, USA) was used to anesthetize the animals. For 70% PHx, the median and left lobes  
11 of liver were resected. For 80% MHx, the median, left and right posterior lobes of the liver  
12 were resected. Sham operation was performed by laparotomy.

13

### 14 **ALF modeling and therapy**

15 The mouse ALF model was established by APAP treatment, as stated previously  
16 (Barbier-Torres et al., 2017). Mice were fasted overnight, and APAP (A3035, Sigma-Aldrich,  
17 USA) was injected intraperitoneally at a lethal dose of 1 g/kg. NAC (A7250, Sigma-Aldrich,  
18 USA) was also injected intraperitoneally at 1 g/kg at 8 h post to APAP challenge. Control mice  
19 were injected with an equal amount of PBS.

20

### 21 **Parabiosis**

22 The parabiosis mouse model was established as previously stated (Liu et al., 2018). The mice



1 to be joined in parabiosis were anaesthetized and shaved along the opposite lateral flanks.  
2 Incisions were made on the corresponding lateral aspects from the olecranon to the knee joint  
3 of each mouse. The olecranon and knee joints were each attached by sutures, and the dorsal  
4 and ventral skins were sewed together with continuous suture. Each pair of parabiotic mice  
5 was kept in a single cage after the operation.

6

### 7 **Gross analyses**

8 Body weights of mice were recorded weekly and food intake was recorded daily. Liver weights  
9 were recorded after sacrifice and gross morphology was characterized. Fasting experiments  
10 were performed after a fasting of 16 h.

11

### 12 **Cage wheel running**

13 As previously reported (Pistilli et al., 2011), spontaneous activity of mice was monitored using  
14 a cage running wheel system (Columbus Instruments, USA). Computer software (RMCWin,  
15 Delta Computer Systems, USA) specific to the equipment was used to quantify the total  
16 number of wheel revolutions. Data were expressed as distance covered per hour.

17

### 18 **PET scanning and quantification of radiation intensity**

19 PET scans were performed using an Inveon microPET scanner (Siemens Medical Solutions,  
20 Germany), as we previously documented (Sun et al., 2017). Briefly, mice were anesthetized  
21 using isoflurane at indicated time points after intravenous injection of <sup>64</sup>Cu-labeled apoEVs  
22 and were scanned under PET. Reconstruction of PET images was done without correction for

1 attenuation or scatter using a 3D ordered subsets expectation maximization algorithm. Image  
2 analysis was performed using ASI Pro VMTM software (Siemens Medical Solutions,  
3 Germany). At 48 h, mice were sacrificed and multiple organs/tissues were dissected and  
4 weighed for biodistribution analysis. The radiation intensity of  $^{64}\text{Cu}$  signals was measured in a  
5 well gamma-counter (Wallach Wizard, PerkinElmer, USA).

6

### 7 **Liver histology and IF staining**

8 At sacrifice, liver tissues were rapidly isolated and fixed overnight with 4% paraformaldehyde  
9 (PFA) (150146, MP Biomedicals, USA). For histological analyses, samples were dehydrated  
10 and embedded in paraffin, and 5  $\mu\text{m}$  serial sections were prepared (RM2125, Leica,  
11 Germany). Sections then underwent either H&E staining (3801698, Leica, Germany),  
12 Masson's trichrome staining (HT15-1KT, Sigma-Aldrich, USA) or TUNEL (G3250, Promega,  
13 USA) staining. For liver damage assessment, H&E staining sections were scored from 0-4 for  
14 sinusoidal congestion, vacuolization of the HC cytoplasm and parenchymal necrosis,  
15 according to Suzuki's classification (Suzuki et al., 1993). Liver inflammation was scored from  
16 0-3 indicating absent, mild, moderate or severe mononuclear and polymorphonuclear  
17 infiltrations (Sancho-Bru et al., 2007).

18 For IF staining, liver tissues were rapidly isolated, fixed in 4% PFA, cryoprotected with 30%  
19 sucrose, and embedded in optimal cutting temperature (OCT) compound (4583, Sakura  
20 Finetek, USA). The specimens were snap-frozen and sectioned into 10  $\mu\text{m}$  sagittal sections  
21 (CM1950, Leica, Germany). For F-actin staining of HC borders, as we previously stated  
22 (Wang et al., 2014), sections were probed with phalloidin conjugated to either AlexaFluor-488

1 or Rhodamine (R37112/R37110, Invitrogen, USA) according to the manufacturer's  
2 instructions, and counterstained with DAPI (ab104139, Abcam, UK). Percentages of  
3 binucleated and mononucleated HCs were quantified using ImageJ 1.47 software (National  
4 Institute of Health, USA) from at least four microscopic fields. For staining of Golgi apparatus  
5 or Kupffer cells, sections were treated with 0.3% Triton X-100 (X100-100ML, Sigma-Aldrich,  
6 USA) diluted in PBS for 20 min at room temperature, blocked with 5% BSA (700-100P, Gemini  
7 Bio, USA) dissolved in PBS for 1 h at room temperature, and stained with a rabbit anti-mouse  
8 Golgin84/Golga5 primary antibody (NBP1-83352, Novus Biologicals, USA) or a rabbit  
9 anti-mouse F4/80 primary antibody (ab6640, Abcam, UK) overnight at 4°C at a concentration  
10 of 1:100. After washing with PBS, sections were then stained with an Alexa Fluor  
11 488-conjugated goat anti-rabbit secondary antibody (A-11008, Invitrogen, USA) for 1 h at  
12 room temperature at a concentration of 1:200, and counterstained with DAPI (ab104139,  
13 Abcam, UK).

14

#### 15 **Serum aminotransferase analyses and enzyme-linked immunosorbent assay (ELISA)**

16 At sacrifice, whole peripheral blood was extracted from the mouse retro-orbital venous plexus,  
17 and serum was isolated by centrifugation at 3,000 g for 15 min at 4°C followed by  
18 centrifugation at 12,000 g for 15 min at 4°C. Concentrations of ALT and AST were determined  
19 using general chemistry kits (A7526-150 and A7561-150, Pointe Scientific, USA) according to  
20 the manufacturer's instructions. Concentrations of tumor necrosis factor-alpha (TNF- $\alpha$ ) and  
21 interleukin-6 (IL-6) were determined using ELISA kits (430907 and 431307, BioLegend, USA)  
22 according to the manufacturer's instructions.

1

## 2 **Ploidy analyses by PI staining**

3 For detection of ploidy (Zhang et al., 2018b), freshly isolated primary HCs or cultured HCs  
4 collected after ploidy transition were fixed at  $2 \times 10^6$ /ml in 75% ethanol overnight at  $-20^\circ\text{C}$ . Cells  
5 were then incubated with 500  $\mu\text{l}$  of PI/Rnase Staining Buffer (550825, BD Pharmingen, USA)  
6 at room temperature for 15 min and analyzed by flow cytometry.

7

## 8 **IF staining of cells and apoEVs**

9 For IF staining of cytoskeleton and organelles (Joseph et al., 2008; Kolobova et al., 2017),  
10 cultured HCs were fixed at  $37^\circ\text{C}$  for 15 min with 4% PFA dissolved in the microtubule  
11 stabilizing buffer (MTSB), which was composed of 50 mM piperazine-1,4-bisethanesulfonic  
12 acid (PIPES) (190257, MP Biomedicals, USA), 5 mM EGTA (E3889, Sigma-Aldrich, USA) and  
13 5 mM  $\text{MgSO}_4$  (13142-100G, Honeywell, USA) in distilled water ( $\text{pH} = 7.0$ ). After washing with  
14 MTSB, cells were permeabilized with ice-cold methanol for 10 min, washed with MTSB, and  
15 blocked with 5% BSA (700-100P, Gemini Bio, USA) in MTSB for 1 h at room temperature.  
16 Cells were then stained with a mouse anti-mouse GM130 primary antibody (610822, BD  
17 Transduction Laboratories, USA) alone or together with a rat anti-mouse  $\alpha$ -tubulin primary  
18 antibody (MA1-80017, Invitrogen, USA) or a rabbit anti-mouse ac- $\alpha$ -tubulin (acetyl K40)  
19 primary antibody (ab179484, Abcam, UK) overnight at  $4^\circ\text{C}$  at a concentration of 1:100 in  
20 MTSB. After washing with MTSB, cells were then stained with Alexa Fluor 488-conjugated  
21 goat anti-mouse secondary antibody (A-11001, Invitrogen, USA) alone or together with Alexa  
22 Fluor 647-conjugated goat anti-rat secondary antibody (A-21247, Invitrogen, USA) or Alexa

1 Fluor 647-conjugated goat anti-rabbit secondary antibody (A-21245, Invitrogen, USA) for 1 h  
2 at room temperature at a concentration of 1:200 in MTSB, and counterstained by DAPI  
3 (ab104139, Abcam, UK).

4 For IF staining of surface markers of apoEVs, after isolation, apoEVs were stained with  
5 rabbit anti-human/mouse VAMP3 primary antibody (13640, Cell Signaling Technology, USA),  
6 rabbit anti-mouse VAMP4 primary antibody (PA1-768, Invitrogen, USA), mouse anti-mouse  
7 GS15 primary antibody (610960, BD Transduction Laboratories, UK), rabbit anti-mouse C1q  
8 primary antibody (ab71940, Abcam, UK), or mouse anti-mouse TSP1 primary antibody  
9 (sc-59887, Santa Cruz Biotechnology, USA) at 4°C for 1 h at a concentration of 1:100 in PBS.  
10 After centrifugation and washing with PBS, apoEVs were then stained with FITC-conjugated  
11 goat anti-mouse secondary antibody (405305, BioLegend, USA) or FITC-conjugated donkey  
12 anti-rabbit secondary antibody (406403, BioLegend, USA) for 1 h at 4°C at a concentration of  
13 1:200 in PBS, and counterstained with CellMask™ Deep Red (C10046, Invitrogen, USA).

14

#### 15 **Annexin V and lectin binding assay**

16 Exposure of PtdSer on apoEVs was detected by FITC-conjugated Annexin V (640906,  
17 BioLegend, USA) binding at a concentration of 1:100 according to the manufacturer's  
18 instructions and counterstained with CellMask™ Deep Red (C10046, Invitrogen, USA).

19 Exposure of Gal or GalNAc on apoEVs, Exos and MSCs was respectively detected by  
20 FITC-conjugated peanut lectin (L7381, Sigma-Aldrich, USA) or Alexa Fluor 488-conjugated  
21 soybean lectin (L11272, Invitrogen, USA) binding both at a concentration of 1:100 for 1 h at  
22 4°C, followed by counterstaining with CellMask™ Deep Red for membrane labeling (C10046,

1 Invitrogen, USA). Fluorescence intensity was determined using a microplate reader (Synergy  
2 H1, Bio-Tek, USA) with Gen5 software (Bio-Tek, USA) at 488/517 nm for lectins and 649/666  
3 nm for CellMask™ Deep Red.

4

## 5 **Image acquisition and analyses**

6 Bright-field images of cell morphology, liver H&E, Masson's and TUNEL staining, and  
7 fluorescent images of liver engraftment of apoEVs, apoEV uptake *in vitro* and marker  
8 expression were obtained using an inverted microscope (Axio Observer 5, Zeiss, Germany).  
9 Fluorescent images of liver ploidy, apoEV uptake *in vivo*, Golgi and microtubule analyses  
10 were obtained using confocal microscopes (SP5-II, Leica, Germany; or LSM 900, Zeiss,  
11 Germany). Z-stacks of images were scanned at high resolution and were processed and  
12 reconstructed in 3 dimensions. Volocity software (PerkinElmer, USA) was applied for 3D  
13 analysis of apoEV interactions with the Golgi. Quantification of images was carried out with  
14 the ImageJ 1.47 software (National Institutes of Health, USA).

15

## 16 **Flow cytometry**

17 Sorting of HCs was performed using the MoFlo Astrios EQ Cell Sorter (Beckman Coulter,  
18 USA) with a 150 µm nozzle. Doublets were eliminated on the basis of pulse width, and ploidy  
19 populations were identified by Hoechst 33342-stained DNA contents using an ultraviolet 355  
20 nm laser and a 425-440 nm bandpass filter. Ploidy analyses of HCs after PI staining were  
21 evaluated using a FACSCalibur Flow Cytometer (BD Biosciences, USA). Analyses of apoEV  
22 uptake efficacy, cellular apoptotic rates and apoEV marker expression were performed using

1 a NovoCyte Flow Cytometer (ACEA Biosciences, USA). CellMask™ Deep Red staining was  
2 used to eliminate background noise signals when analyzing apoEVs. Flow cytometric data  
3 were processed using FlowJo v10 software (FlowJo LLC, USA).

4

## 5 **Golgi isolation**

6 Golgi apparatus was isolated from mouse liver or cultured HCs by sequential sucrose  
7 gradients using a Golgi Isolation Kit (GL0010-1KT, Sigma-Aldrich, USA), based on the  
8 protocol we previously established (Tang and Wang, 2015). Isolated Golgi proteins were  
9 extracted and the protein mass was determined using the BCA method (23225, Thermo  
10 Scientific, USA).

11

## 12 **Transmission electron microscopy (TEM) analyses**

13 Cultured HCs were collected by trypsin (12605-010, Invitrogen, USA) after 96 h in the ploidy  
14 transition protocol. HCs were then fixed with 2.5% glutaraldehyde (G5882, Sigma-Aldrich,  
15 USA) and 2.0% PFA (150146, Sigma-Aldrich, USA) solution in 0.1 M sodium cacodylate  
16 buffer (pH =7.4) (C0250, Sigma-Aldrich, USA) overnight at 4°C. After subsequent washes, the  
17 samples were post-fixed in 2.0% osmium tetroxide (75633-2ML, Sigma-Aldrich, USA) for 1 h  
18 at room temperature, and rinsed in distilled water prior to *en bloc* staining with 2% uranyl  
19 acetate (22400, Electron Microscopy Sciences, USA). After dehydration through a graded  
20 ethanol series, the specimens were infiltrated and embedded in the EMbed-812 resin (14120,  
21 Electron Microscopy Sciences, USA). Thin sections were stained with uranyl acetate and lead  
22 citrate (22410, Electron Microscopy Sciences, USA), and examined with a JEM-1010 electron

1 microscope (JEOL, Japan) fitted with a digital camera (Hamamatsu Photonics, Japan) and  
2 image capture software (AMT Imaging, USA). Interphase 4N-HCs containing a binucleated  
3 profile with an intact nuclear envelope were selected to quantify distinguishable Golgi stacks  
4 per cell. Golgi stacks were identified using morphological criteria and were quantified using  
5 standard stereological techniques, as we previously stated (Souter et al., 1993; Xiang and  
6 Wang, 2010).

7 TEM analyses of apoEVs and liver tissue EVs were performed on collected pellets diluted  
8 in PBS. Diluted EVs were fixed with 1% glutaraldehyde (G5882, Sigma-Aldrich, USA) for 30  
9 min at 4°C, absorbed onto glow-discharged 300-mesh heavy-duty carbon-coated formvar  
10 copper grids (ProSciTech, Australia) for 5 min, and the excess liquid was blotted on filter  
11 papers. Grids were washed twice with distilled water and negatively stained with 2.5% uranyl  
12 acetate (22400, Electron Microscopy Sciences, USA). Wide-field images encompassing  
13 multiple vesicles were taken on a JEM-1200EX electron microscope (JEOL, Japan).

14

#### 15 **NTA analyses**

16 The size distribution of apoEVs and liver tissue EVs was measured using NanoSight NS300  
17 (Malvern Panalytical, UK) and analyzed with NTA software (Malvern Panalytical, UK).  
18 Quantification of liver tissue EVs was also performed using ZetaView instrument S/N 19-447  
19 (Particle Metrix, Germany) and analyzed with ZetaView analysis software (Particle Metrix,  
20 Germany).

21

#### 22 **RNA extraction and quantitative real-time polymerase chain reaction (qRT-PCR)**



1 Total RNA was isolated from freshly isolated or cultured cells using the Aurum Total RNA Mini  
2 Kit (732-6820, Bio-Rad, USA) according to the manufacturer's instructions. cDNA was  
3 synthesized using the Reverse Transcription Kit (4368814, Applied Biosystems, USA).  
4 qRT-PCR was performed using SYBR Green Master Mix (B21202, Bimake, USA) on the  
5 Real-Time PCR Systems (CFX96, Bio-Rad, USA; or LightCycler 96, Roche Life Science,  
6 Swiss). The primers used in this study are listed in Table S2.  $\beta$ -actin was used as the internal  
7 control.

8

### 9 **Western blot assay**

10 Western blot assay was performed on cultured MSCs or HCs, isolated apoEVs or liver tissue  
11 EVs, and isolated Golgi after lysis in the RIPA Lysis Buffer System with protease and  
12 phosphatase inhibitors (sc-24948, Santa Cruz Biotechnology, USA). Protein levels were  
13 quantified using the Pierce™ BCA Protein Assay Kit (23225, Thermo Scientific, USA). A total  
14 of 20  $\mu$ g protein was separated in the 4%-12% NuPAGE gel (NP0321BOX/NP0322BOX,  
15 Invitrogen, USA) and was transferred to 0.2  $\mu$ m nitrocellulose membranes (Millipore, USA).  
16 The membranes were then blocked with 5% BSA (700-100P, Gemini Bio, USA) at room  
17 temperature for 1 h, followed by incubation overnight at 4°C with the following primary  
18 antibodies: antibodies to GRASP55 (sc-271840), TGN38 (sc-166594), CD9 (sc-13118), CD63  
19 (sc-5275), CD81 (sc-70803), INCENP (sc-376514), RacGAP1 (sc-166477) and RhoA (sc-418)  
20 were purchased from Santa Cruz Biotechnology, USA, and were used at concentrations of  
21 1:200; antibodies to Stx5 (14151), Caspase 3 (9662), Cleaved caspase-3 (9664), VAMP3  
22 (13640) and GAPDH (5174) were obtained from Cell Signaling Technology, USA, and were

1 used at concentrations of 1:1000; the antibody to GM130 (610822) was purchased from BD  
2 Transduction Laboratories, USA, and was used at a concentration of 1:1000; the antibody to  
3 Golgin84 (NBP1-83352) was purchased from Novus Biologicals, USA, and was used at a  
4 concentration of 1:1000; antibodies to  $\alpha$ -tubulin (MA1-80017) and VAMP4 (PA1-768) were  
5 purchased from Invitrogen, USA, and were used at concentrations of 1:1000; antibodies to  
6 ac- $\alpha$ -tubulin (ab179484), Lamin B1 (ab133741) and hVAMP3 (ab200657) were purchased  
7 from Abcam, UK, and were used at concentrations of 1:1000; the antibody to MKLP1/KIF23  
8 (DF2573) was purchased from Affinity Biosciences, China, and was used at a concentration of  
9 1:500; antibodies to GFP (SAB2702197) and  $\beta$ -actin (A5441) were purchased from  
10 Sigma-Aldrich, USA, and were used at concentrations of 1:1000. The membranes were then  
11 washed and incubated for 1 h at room temperature with horseradish peroxidase  
12 (HRP)-conjugated secondary antibodies (sc-516102/sc-2357, Santa Cruz Biotechnology,  
13 USA; or 7077, Cell Signaling Technology, USA). Immunoreactive proteins were detected  
14 using the SuperSignal™ West Pico PLUS Chemiluminescent Substrate (34580, Thermo  
15 Scientific, USA), the SuperSignal™ West Femto Maximum Sensitivity Substrate (34095,  
16 Thermo Scientific, USA), and the Autoradiography Film (LabScientific, USA) or the ChemiDoc  
17 MP Imaging System (Bio-Rad, USA).

18

### 19 **Oxygen consumption assessment**

20 Mitochondrial OXPHOS activity was measured using Mito-ID® O<sub>2</sub> Extracellular Sensor Kit  
21 (ENZ-51044, Enzo Life Sciences, USA) according to the manufacturer's protocol, in which  
22 oxygen consumption was detected based on a fluorescent probe. Briefly, 10  $\mu$ L probe was

1 added to cultured HCs, and the fluorescence intensity was read immediately using the  
2 microplate reader (Synergy H1, Bio-Tek, USA) with the Gen5 software (Bio-Tek, USA) at  
3 380/650 nm kinetically for 90 min, at an interval of 1 min. The mean value of fluorescence  
4 intensity of 3 wells per group was determined for the oxygen consumption curves (Lv et al.,  
5 2018).

6

### 7 **ROS determination**

8 Total intracellular ROS contents of cultured HCs were measured using the fluorescent probe  
9 2',7'-dichlorofluorescein diacetate (DCFDA) (ab113851, Abcam, UK) (Lv et al., 2018). Briefly,  
10 25 mM DCFDA was added to cells and was incubated at 37°C for 30 min. Fluorescence  
11 intensity was determined using a microplate reader (Synergy H1, Bio-Tek, USA) with the  
12 Gen5 software (Bio-Tek, USA) with an excitation at 488 nm.

13

### 14 **QUANTIFICATION AND STATISTICAL ANALYSIS**

15 Data are represented as the mean  $\pm$  standard deviation (SD) unless otherwise indicated.  
16 Statistical significance was evaluated by two-tailed Student's *t* test for two-group comparison,  
17 or by one-way analysis of variation (ANOVA) followed by Newman-Keuls post-hoc tests for  
18 multiple comparisons using Prism 5.01 software (GraphPad, USA). Log-rank tests were used  
19 for Kaplan-Meier survival curve comparisons. Values of  $P < 0.05$  were considered statistically  
20 significant.

21

### 22 **MATERIALS AVAILABILITY**

1 This study did not generate new unique reagents.

2

3 **DATA AND CODE AVAILABILITY**

4 This study did not generate/analyze [datasets/code].

5

## 1 **References**

- 2 Arandjelovic, S., and Ravichandran, K.S. (2015). Phagocytosis of apoptotic cells in  
3 homeostasis. *Nat. Immunol.* *16*, 907-917.
- 4 Ashwell, G., and Harford, J. (1982). Carbohydrate-specific receptors of the liver. *Annu. Rev.*  
5 *Biochem.* *51*, 531-554.
- 6 Atkin-Smith, G.K., Tixeira, R., Paone, S., Mathivanan, S., Collins, C., Liem, M., Goodall, K.J.,  
7 Ravichandran, K.S., Hulett, M.D., and Poon, I.K. (2015). A novel mechanism of generating  
8 extracellular vesicles during apoptosis via a beads-on-a-string membrane structure. *Nat.*  
9 *Commun.* *6*, 7439.
- 10 Barbier-Torres, L., Iruzubieta, P., Fernandez-Ramos, D., Delgado, T.C., Taibo, D.,  
11 Guitierrez-de-Juan, V., Varela-Rey, M., Azkargorta, M., Navasa, N., Fernandez-Tussy, P., *et al.*  
12 (2017). The mitochondrial negative regulator MCJ is a therapeutic target for  
13 acetaminophen-induced liver injury. *Nat. Commun.* *8*, 2068.
- 14 Barr, F.A., and Gruneberg, U. (2007). Cytokinesis: placing and making the final cut. *Cell* *131*,  
15 847-860.
- 16 Belmokhtar, C.A., Hillion, J., and Segal-Bendirdjian, E. (2001). Staurosporine induces  
17 apoptosis through both caspase-dependent and caspase-independent mechanisms.  
18 *Oncogene* *20*, 3354-3362.
- 19 Berda-Haddad, Y., Robert, S., Salers, P., Zekraoui, L., Farnarier, C., Dinarello, C.A.,  
20 Dignat-George, F., and Kaplanski, G. (2011). Sterile inflammation of endothelial cell-derived  
21 apoptotic bodies is mediated by interleukin-1alpha. *Proc. Natl. Acad. Sci. U S A* *108*,

- 1 20684-20689.
- 2 Bessone, F., Poles, N., and Roma, M.G. (2014). Challenge of liver disease in systemic lupus  
3 erythematosus: Clues for diagnosis and hints for pathogenesis. *World J. Hepatol.* 6, 394-409.
- 4 Blieden, M., Paramore, L.C., Shah, D., and Ben-Joseph, R. (2014). A perspective on the  
5 epidemiology of acetaminophen exposure and toxicity in the United States. *Expert Rev. Clin.*  
6 *Pharmacol.* 7, 341-348.
- 7 Brock, C.K., Wallin, S.T., Ruiz, O.E., Samms, K.M., Mandal, A., Sumner, E.A., and Eisenhoffer,  
8 G.T. (2019). Stem cell proliferation is induced by apoptotic bodies from dying cells during  
9 epithelial tissue maintenance. *Nat. Commun.* 10, 1044.
- 10 Canbay, A., Feldstein, A.E., Higuchi, H., Werneburg, N., Grambihler, A., Bronk, S.F., and  
11 Gores, G.J. (2003). Kupffer cell engulfment of apoptotic bodies stimulates death ligand and  
12 cytokine expression. *Hepatology* 38, 1188-1198.
- 13 Caruso, S., and Poon, I.K.H. (2018). Apoptotic Cell-Derived Extracellular Vesicles: More Than  
14 Just Debris. *Front. Immunol.* 9, 1486.
- 15 Chekeni, F.B., Elliott, M.R., Sandilos, J.K., Walk, S.F., Kinchen, J.M., Lazarowski, E.R.,  
16 Armstrong, A.J., Penuela, S., Laird, D.W., Salvesen, G.S., *et al.* (2010). Pannexin 1 channels  
17 mediate 'find-me' signal release and membrane permeability during apoptosis. *Nature* 467,  
18 863-867.
- 19 Chera, S., Ghila, L., Dobretz, K., Wenger, Y., Bauer, C., Buzgariu, W., Martinou, J.C., and  
20 Galliot, B. (2009). Apoptotic cells provide an unexpected source of Wnt3 signaling to drive  
21 hydra head regeneration. *Dev. Cell* 17, 279-289.

- 1 Coleman, M.L., Sahai, E.A., Yeo, M., Bosch, M., Dewar, A., and Olson, M.F. (2001).  
2 Membrane blebbing during apoptosis results from caspase-mediated activation of ROCK I.  
3 Nat. Cell Biol. 3, 339-345.
- 4 Desbarats, J., and Newell, M.K. (2000). Fas engagement accelerates liver regeneration after  
5 partial hepatectomy. Nat. Med. 6, 920-923.
- 6 Dieude, M., Bell, C., Turgeon, J., Beillevaire, D., Pomerleau, L., Yang, B., Hamelin, K., Qi, S.,  
7 Pallet, N., Beland, C., *et al.* (2015). The 20S proteasome core, active within apoptotic  
8 exosome-like vesicles, induces autoantibody production and accelerates rejection. Sci. Transl.  
9 Med. 7, 318ra200.
- 10 Dini, L., Autuori, F., Lentini, A., Oliverio, S., and Piacentini, M. (1992). The clearance of  
11 apoptotic cells in the liver is mediated by the asialoglycoprotein receptor. FEBS Lett. 296,  
12 174-178.
- 13 Dou, G., Tian, R., Liu, X., Yuan, P., Ye, Q., Liu, J., Liu, S., Zhou, J., Deng, Z., Chen, X., *et al.*  
14 (2020). Chimeric apoptotic bodies functionalized with natural membrane and modular delivery  
15 system for inflammation modulation. Sci. Adv. 6, eaba2987.
- 16 Duncan, A.W., Hanlon Newell, A.E., Bi, W., Finegold, M.J., Olson, S.B., Beaudet, A.L., and  
17 Grompe, M. (2012). Aneuploidy as a mechanism for stress-induced liver adaptation. J. Clin.  
18 Invest. 122, 3307-3315.
- 19 Duncan, A.W., Taylor, M.H., Hickey, R.D., Hanlon Newell, A.E., Lenzi, M.L., Olson, S.B.,  
20 Finegold, M.J., and Grompe, M. (2010). The ploidy conveyor of mature hepatocytes as a  
21 source of genetic variation. Nature 467, 707-710.

- 1 Elliott, M.R., and Ravichandran, K.S. (2016). The Dynamics of Apoptotic Cell Clearance. *Dev.*  
2 *Cell* 38, 147-160.
- 3 Field, M.C., and Dacks, J.B. (2009). First and last ancestors: reconstructing evolution of the  
4 endomembrane system with ESCRTs, vesicle coat proteins, and nuclear pore complexes.  
5 *Curr. Opin. Cell Biol.* 21, 4-13.
- 6 Forbes, S.J., and Newsome, P.N. (2016). Liver regeneration - mechanisms and models to  
7 clinical application. *Nat. Rev. Gastroenterol. Hepatol.* 13, 473-485.
- 8 Fortier, M., Celton-Morizur, S., and Desdouets, C. (2017). Incomplete cytokinesis/binucleation  
9 in mammals: The powerful system of hepatocytes. *Methods Cell Biol.* 137, 119-142.
- 10 Fuchs, Y., Brown, S., Gorenc, T., Rodriguez, J., Fuchs, E., and Steller, H. (2013). Sept4/ARTS  
11 regulates stem cell apoptosis and skin regeneration. *Science* 341, 286-289.
- 12 Fuchs, Y., and Steller, H. (2011). Programmed cell death in animal development and disease.  
13 *Cell* 147, 742-758.
- 14 Galipeau, J., and Sensebe, L. (2018). Mesenchymal Stromal Cells: Clinical Challenges and  
15 Therapeutic Opportunities. *Cell Stem Cell* 22, 824-833.
- 16 Galleu, A., Riffo-Vasquez, Y., Trento, C., Lomas, C., Dolcetti, L., Cheung, T.S., von Bonin, M.,  
17 Barbieri, L., Halai, K., Ward, S., *et al.* (2017). Apoptosis in mesenchymal stromal cells induces  
18 in vivo recipient-mediated immunomodulation. *Sci. Transl. Med.* 9.
- 19 Gentric, G., Maillet, V., Paradis, V., Couton, D., L'Hermitte, A., Panasyuk, G., Fromenty, B.,  
20 Celton-Morizur, S., and Desdouets, C. (2015). Oxidative stress promotes pathologic  
21 polyploidization in nonalcoholic fatty liver disease. *J. Clin. Invest.* 125, 981-992.



- 1 Han, C.Z., and Ravichandran, K.S. (2011). Metabolic connections during apoptotic cell  
2 engulfment. *Cell* 147, 1442-1445.
- 3 Heusermann, W., Hean, J., Trojer, D., Steib, E., von Bueren, S., Graff-Meyer, A., Genoud, C.,  
4 Martin, K., Pizzato, N., Voshol, J., *et al.* (2016). Exosomes surf on filopodia to enter cells at  
5 endocytic hot spots, traffic within endosomes, and are targeted to the ER. *J. Cell Biol.* 213,  
6 173-184.
- 7 Hori, T., Ohashi, N., Chen, F., Baine, A.M., Gardner, L.B., Jermanus, S., and Nguyen, J.H.  
8 (2011). Simple and sure methodology for massive hepatectomy in the mouse. *Ann.*  
9 *Gastroenterol.* 24, 307-318.
- 10 Ishiguro, K., Yan, I.K., and Patel, T. (2019). Isolation of Tissue Extracellular Vesicles from the  
11 Liver. *J. Vis. Exp.*
- 12 Johannes, L., and Popoff, V. (2008). Tracing the retrograde route in protein trafficking. *Cell*  
13 135, 1175-1187.
- 14 Joseph, R.A., Shepard, B.D., Kannarkat, G.T., Rutledge, T.M., Tuma, D.J., and Tuma, P.L.  
15 (2008). Microtubule acetylation and stability may explain alcohol-induced alterations in  
16 hepatic protein trafficking. *Hepatology* 47, 1745-1753.
- 17 Joshi, B.S., de Beer, M.A., Giepmans, B.N.G., and Zuhorn, I.S. (2020). Endocytosis of  
18 Extracellular Vesicles and Release of Their Cargo from Endosomes. *ACS Nano* 14,  
19 4444-4455.
- 20 Kolobova, E., Roland, J.T., Lapierre, L.A., Williams, J.A., Mason, T.A., and Goldenring, J.R.  
21 (2017). The C-terminal region of A-kinase anchor protein 350 (AKAP350A) enables formation

1 of microtubule-nucleation centers and interacts with pericentriolar proteins. *J. Biol. Chem.* 292,  
2 20394-20409.

3 Kreutz, C., MacNelly, S., Follo, M., Waldin, A., Binninger-Lacour, P., Timmer, J., and  
4 Bartolome-Rodriguez, M.M. (2017). Hepatocyte Ploidy Is a Diversity Factor for Liver  
5 Homeostasis. *Front. Physiol.* 8, 862.

6 Lee, M.C., Miller, E.A., Goldberg, J., Orci, L., and Schekman, R. (2004). Bi-directional protein  
7 transport between the ER and Golgi. *Annu. Rev. Cell Dev. Biol.* 20, 87-123.

8 Li, F., Huang, Q., Chen, J., Peng, Y., Roop, D.R., Bedford, J.S., and Li, C.Y. (2010). Apoptotic  
9 cells activate the "phoenix rising" pathway to promote wound healing and tissue regeneration.  
10 *Sci. Signal.* 3, ra13.

11 Li, P.P., Liu, S.N., Lu, M., Bandyopadhyay, G., Oh, D., Imamura, T., Johnson, A.M.F., Sears,  
12 D., Shen, Z.F., Cui, B., *et al.* (2016). Hematopoietic-Derived Galectin-3 Causes Cellular and  
13 Systemic Insulin Resistance. *Cell* 167, 973-+.

14 Liu, D., Kou, X., Chen, C., Liu, S., Liu, Y., Yu, W., Yu, T., Yang, R., Wang, R., Zhou, Y., *et al.*  
15 (2018). Circulating apoptotic bodies maintain mesenchymal stem cell homeostasis and  
16 ameliorate osteopenia via transferring multiple cellular factors. *Cell Res.* 28, 918-933.

17 Liu, H., Liu, S., Qiu, X., Yang, X., Bao, L., Pu, F., Liu, X., Li, C., Xuan, K., Zhou, J., *et al.* (2020).  
18 Donor MSCs release apoptotic bodies to improve myocardial infarction via autophagy  
19 regulation in recipient cells. *Autophagy.* 1-16.

20 Liu, S.Y., Liu, D.W., Chen, C.D., Hamamura, K., Moshaverinia, A., Yang, R.L., Liu, Y., Jin, Y.,  
21 and Shi, S.T. (2015). MSC Transplantation Improves Osteopenia via Epigenetic Regulation of

- 1 Notch Signaling in Lupus. *Cell Metab.* 22, 606-618.
- 2 Lv, Y.J., Yang, Y., Sui, B.D., Hu, C.H., Zhao, P., Liao, L., Chen, J., Zhang, L.Q., Yang, T.T.,  
3 Zhang, S.F., *et al.* (2018). Resveratrol counteracts bone loss via mitofilin-mediated osteogenic  
4 improvement of mesenchymal stem cells in senescence-accelerated mice. *Theranostics* 8,  
5 2387-2406.
- 6 Lynch, C., Panagopoulou, M., and Gregory, C.D. (2017). Extracellular Vesicles Arising from  
7 Apoptotic Cells in Tumors: Roles in Cancer Pathogenesis and Potential Clinical Applications.  
8 *Front. Immunol.* 8, 1174.
- 9 Machamer, C.E. (2015). The Golgi complex in stress and death. *Front. Neurosci.* 9, 421.
- 10 Matsumoto, T., Wakefield, L., Tarlow, B.D., and Grompe, M. (2020). In Vivo Lineage Tracing of  
11 Polyploid Hepatocytes Reveals Extensive Proliferation during Liver Regeneration. *Cell Stem*  
12 *Cell* 26, 34-47 e33.
- 13 McMahon, H.T., Ushkaryov, Y.A., Edelmann, L., Link, E., Binz, T., Niemann, H., Jahn, R., and  
14 Sudhof, T.C. (1993). Cellubrevin is a ubiquitous tetanus-toxin substrate homologous to a  
15 putative synaptic vesicle fusion protein. *Nature* 364, 346-349.
- 16 McVicker, B.L., Tuma, D.J., Kubik, J.A., Hindemith, A.M., Baldwin, C.R., and Casey, C.A.  
17 (2002). The effect of ethanol on asialoglycoprotein receptor-mediated phagocytosis of  
18 apoptotic cells by rat hepatocytes. *Hepatology* 36, 1478-1487.
- 19 Medina, C.B., Mehrotra, P., Arandjelovic, S., Perry, J.S.A., Guo, Y., Morioka, S., Barron, B.,  
20 Walk, S.F., Ghesquiere, B., Krupnick, A.S., *et al.* (2020). Metabolites released from apoptotic  
21 cells act as tissue messengers. *Nature* 580, 130-135.

- 1 Mitchell, C., and Willenbring, H. (2008). A reproducible and well-tolerated method for 2/3  
2 partial hepatectomy in mice. *Nat. Protoc.* 3, 1167-1170.
- 3 Miyaoka, Y., Ebato, K., Kato, H., Arakawa, S., Shimizu, S., and Miyajima, A. (2012).  
4 Hypertrophy and unconventional cell division of hepatocytes underlie liver regeneration. *Curr.*  
5 *Biol.* 22, 1166-1175.
- 6 Montagnac, G., Meas-Yedid, V., Irondelle, M., Castro-Castro, A., Franco, M., Shida, T.,  
7 Nachury, M.V., Benmerah, A., Olivo-Marin, J.C., and Chavrier, P. (2013). alphaTAT1 catalyses  
8 microtubule acetylation at clathrin-coated pits. *Nature* 502, 567-570.
- 9 Morioka, S., Maueroeder, C., and Ravichandran, K.S. (2019). Living on the Edge: Efferocytosis  
10 at the Interface of Homeostasis and Pathology. *Immunity* 50, 1149-1162.
- 11 Morioka, S., Perry, J.S.A., Raymond, M.H., Medina, C.B., Zhu, Y., Zhao, L., Serbulea, V.,  
12 Onengut-Gumuscu, S., Leitinger, N., Kucenas, S., *et al.* (2018). Efferocytosis induces a novel  
13 SLC program to promote glucose uptake and lactate release. *Nature* 563, 714-718.
- 14 Nakakura, T., Nemoto, T., Suzuki, T., Asano-Hoshino, A., Tanaka, H., Arisawa, K., Nishijima,  
15 Y., Kiuchi, Y., and Hagiwara, H. (2016). Adrenalectomy facilitates ATAT1 expression and  
16 alpha-tubulin acetylation in ACTH-producing corticotrophs. *Cell Tissue Res.* 366, 363-370.
- 17 Pfeffer, S.R. (1996). Transport vesicle docking: SNAREs and associates. *Annu. Rev. Cell Dev.*  
18 *Biol.* 12, 441-461.
- 19 Pistilli, E.E., Bogdanovich, S., Garton, F., Yang, N., Gulbin, J.P., Conner, J.D., Anderson, B.G.,  
20 Quinn, L.S., North, K., Ahima, R.S., *et al.* (2011). Loss of IL-15 receptor alpha alters the  
21 endurance, fatigability, and metabolic characteristics of mouse fast skeletal muscles. *J. Clin.*

- 1 Invest. 121, 3120-3132.
- 2 Pitt, J.M., Kroemer, G., and Zitvogel, L. (2016). Extracellular vesicles: masters of intercellular  
3 communication and potential clinical interventions. *J. Clin. Invest.* 126, 1139-1143.
- 4 Poon, I.K., Chiu, Y.H., Armstrong, A.J., Kinchen, J.M., Juncadella, I.J., Bayliss, D.A., and  
5 Ravichandran, K.S. (2014). Unexpected link between an antibiotic, pannexin channels and  
6 apoptosis. *Nature* 507, 329-334.
- 7 Rios, R.M., Sanchis, A., Tassin, A.M., Fedriani, C., and Bornens, M. (2004). GMAP-210  
8 recruits gamma-tubulin complexes to cis-Golgi membranes and is required for Golgi ribbon  
9 formation. *Cell* 118, 323-335.
- 10 Roy, S., Hochberg, F.H., and Jones, P.S. (2018). Extracellular vesicles: the growth as  
11 diagnostics and therapeutics; a survey. *J. Extracell. Vesicles* 7, 1438720.
- 12 Sakamoto, T., Liu, Z., Murase, N., Ezure, T., Yokomuro, S., Poli, V., and Demetris, A.J. (1999).  
13 Mitosis and apoptosis in the liver of interleukin-6-deficient mice after partial hepatectomy.  
14 *Hepatology* 29, 403-411.
- 15 Sancho-Bru, P., Bataller, R., Fernandez-Varo, G., Moreno, M., Ramalho, L.N., Colmenero, J.,  
16 Mari, M., Claria, J., Jimenez, W., Arroyo, V., *et al.* (2007). Bradykinin attenuates hepatocellular  
17 damage and fibrosis in rats with chronic liver injury. *Gastroenterology* 133, 2019-2028.
- 18 Sbdio, J.I., Snyder, S.H., and Paul, B.D. (2018). Golgi stress response reprograms cysteine  
19 metabolism to confer cytoprotection in Huntington's disease. *Proc. Natl. Acad. Sci. U S A* 115,  
20 780-785.
- 21 Shi, J., Fujieda, H., Kokubo, Y., and Wake, K. (1996). Apoptosis of neutrophils and their

- 1 elimination by Kupffer cells in rat liver. *Hepatology* 24, 1256-1263.
- 2 Smith, S.M., Renden, R., and von Gersdorff, H. (2008). Synaptic vesicle endocytosis: fast and  
3 slow modes of membrane retrieval. *Trends Neurosci.* 31, 559-568.
- 4 Souter, E., Pypaert, M., and Warren, G. (1993). The Golgi stack reassembles during  
5 telophase before arrival of proteins transported from the endoplasmic reticulum. *J. Cell Biol.*  
6 122, 533-540.
- 7 Stravitz, R.T., and Lee, W.M. (2019). Acute liver failure. *Lancet* 394, 869-881.
- 8 Sui, B.D., Hu, C.H., Zheng, C.X., Shuai, Y., He, X.N., Gao, P.P., Zhao, P., Li, M., Zhang, X.Y.,  
9 He, T., *et al.* (2017). Recipient Glycemic Micro-environments Govern Therapeutic Effects of  
10 Mesenchymal Stem Cell Infusion on Osteopenia. *Theranostics* 7, 1225-1244.
- 11 Sun, L., Wang, D., Liang, J., Zhang, H., Feng, X., Wang, H., Hua, B., Liu, B., Ye, S., Hu, X., *et*  
12 *al.* (2010). Umbilical cord mesenchymal stem cell transplantation in severe and refractory  
13 systemic lupus erythematosus. *Arthritis Rheum.* 62, 2467-2475.
- 14 Sun, X., Yan, X., Jacobson, O., Sun, W., Wang, Z., Tong, X., Xia, Y., Ling, D., and Chen, X.  
15 (2017). Improved Tumor Uptake by Optimizing Liposome Based RES Blockade Strategy.  
16 *Theranostics* 7, 319-328.
- 17 Suzuki, S., Toledo-Pereyra, L.H., Rodriguez, F.J., and Cejalvo, D. (1993). Neutrophil  
18 infiltration as an important factor in liver ischemia and reperfusion injury. Modulating effects of  
19 FK506 and cyclosporine. *Transplantation* 55, 1265-1272.
- 20 Tang, D., and Wang, Y. (2015). Golgi isolation. *Cold Spring Harb. Protoc.* 2015, 562-567.

- 1 Wang, M.J., Chen, F., Lau, J.T.Y., and Hu, Y.P. (2017). Hepatocyte polyploidization and its  
2 association with pathophysiological processes. *Cell Death Dis.* **8**, e2805.
- 3 Wang, M.J., Chen, F., Li, J.X., Liu, C.C., Zhang, H.B., Xia, Y., Yu, B., You, P., Xiang, D., Lu, L.,  
4 *et al.* (2014). Reversal of hepatocyte senescence after continuous in vivo cell proliferation.  
5 *Hepatology* **60**, 349-361.
- 6 Watanabe-Fukunaga, R., Brannan, C.I., Copeland, N.G., Jenkins, N.A., and Nagata, S.  
7 (1992). Lymphoproliferation disorder in mice explained by defects in Fas antigen that  
8 mediates apoptosis. *Nature* **356**, 314-317.
- 9 Wei, J.H., Zhang, Z.C., Wynn, R.M., and Seemann, J. (2015). GM130 Regulates  
10 Golgi-Derived Spindle Assembly by Activating TPX2 and Capturing Microtubules. *Cell* **162**,  
11 287-299.
- 12 Wickman, G.R., Julian, L., Mardilovich, K., Schumacher, S., Munro, J., Rath, N., Zander, S.A.,  
13 Mleczak, A., Sumpton, D., Morrice, N., *et al.* (2013). Blebs produced by actin-myosin  
14 contraction during apoptosis release damage-associated molecular pattern proteins before  
15 secondary necrosis occurs. *Cell Death Differ.* **20**, 1293-1305.
- 16 Wiklander, O.P., Nordin, J.Z., O'Loughlin, A., Gustafsson, Y., Corso, G., Mager, I., Vader, P.,  
17 Lee, Y., Sork, H., Seow, Y., *et al.* (2015). Extracellular vesicle in vivo biodistribution is  
18 determined by cell source, route of administration and targeting. *J. Extracell. Vesicles* **4**,  
19 26316.
- 20 Wilkinson, P.D., Alencastro, F., Delgado, E.R., Leek, M.P., Weirich, M.P., Otero, P.A., Roy, N.,  
21 Brown, W.K., Oertel, M., and Duncan, A.W. (2019a). Polyploid Hepatocytes Facilitate

- 1 Adaptation and Regeneration to Chronic Liver Injury. *Am. J. Pathol.* 189, 1241-1255.
- 2 Wilkinson, P.D., Delgado, E.R., Alencastro, F., Leek, M.P., Roy, N., Weirich, M.P., Stahl, E.C.,
- 3 Otero, P.A., Chen, M.I., Brown, W.K., *et al.* (2019b). The Polyploid State Restricts Hepatocyte
- 4 Proliferation and Liver Regeneration in Mice. *Hepatology* 69, 1242-1258.
- 5 Williams, R., Alexander, G., Aspinall, R., Bosanquet, J., Camps-Walsh, G., Cramp, M., Day, N.,
- 6 Dhawan, A., Dillon, J., Dyson, J., *et al.* (2017). New metrics for the Lancet Standing
- 7 Commission on Liver Disease in the UK. *Lancet* 389, 2053-2080.
- 8 Xiang, Y., and Wang, Y. (2010). GRASP55 and GRASP65 play complementary and essential
- 9 roles in Golgi cisternal stacking. *J. Cell Biol.* 188, 237-251.
- 10 Xu, G., and Shi, Y. (2007). Apoptosis signaling pathways and lymphocyte homeostasis. *Cell*
- 11 *Res.* 17, 759-771.
- 12 Ying, W., Riopel, M., Bandyopadhyay, G., Dong, Y., Birmingham, A., Seo, J.B., Ofrecio, J.M.,
- 13 Wollam, J., Hernandez-Carretero, A., Fu, W., *et al.* (2017). Adipose Tissue
- 14 Macrophage-Derived Exosomal miRNAs Can Modulate In Vivo and In Vitro Insulin Sensitivity.
- 15 *Cell* 171, 372-384 e312.
- 16 Zhang, S., Nguyen, L.H., Zhou, K., Tu, H.C., Sehgal, A., Nassour, I., Li, L., Gopal, P.,
- 17 Goodman, J., Singal, A.G., *et al.* (2018a). Knockdown of Anillin Actin Binding Protein Blocks
- 18 Cytokinesis in Hepatocytes and Reduces Liver Tumor Development in Mice Without Affecting
- 19 Regeneration. *Gastroenterology* 154, 1421-1434.
- 20 Zhang, S., Zhou, K., Luo, X., Li, L., Tu, H.C., Sehgal, A., Nguyen, L.H., Zhang, Y., Gopal, P.,
- 21 Tarlow, B.D., *et al.* (2018b). The Polyploid State Plays a Tumor-Suppressive Role in the Liver.



- 1 Dev. Cell 44, 447-459 e445.
- 2 Zhang, X., Wang, L., Lak, B., Li, J., Jokitalo, E., and Wang, Y. (2018c). GRASP55 Senses
- 3 Glucose Deprivation through O-GlcNAcylation to Promote Autophagosome-Lysosome Fusion.
- 4 Dev. Cell 45, 245-261 e246.
- 5 Zheng, Z., Liu, H.X., Zhai, S.D., Zhang, H.K., Shan, G.G., Kwok, R.T.K., Ma, C., Sung, H.H.Y.,
- 6 Williams, I.D., Lam, J.W.Y., *et al.* (2020). Highly efficient singlet oxygen generation,
- 7 two-photon photodynamic therapy and melanoma ablation by rationally designed
- 8 mitochondria-specific near-infrared AIEgens. Chem. Sci. 11, 2494-2503.
- 9 Zheng, Z., Zhang, T., Liu, H., Chen, Y., Kwok, R.T.K., Ma, C., Zhang, P., Sung, H.H.Y.,
- 10 Williams, I.D., Lam, J.W.Y., *et al.* (2018). Bright Near-Infrared Aggregation-Induced Emission
- 11 Luminogens with Strong Two-Photon Absorption, Excellent Organelle Specificity, and Efficient
- 12 Photodynamic Therapy Potential. ACS Nano 12, 8145-8159.
- 13
- 14
- 15

1 **Supplementary figure legends**

2 **Figure S1. Identification of extracellular vesicles (EVs) and apoptosis-deficient mouse**  
3 **models used in this study. (A)** Schematic diagram demonstrating protocol for isolation of  
4 staurosporine (STS)-induced apoptotic extracellular vesicles (apoEVs). **(B)** Representative  
5 bright field images showing morphologies of cultured mesenchymal stem cells (MSCs)  
6 without or with STS treatment. Ctrl, control. Scale bars = 50  $\mu\text{m}$ . **(C)** Representative  
7 fluorescent images showing terminal deoxynucleotidyl transferase dUTP nick end labeling  
8 (TUNEL, green) staining of apoptotic MSCs counterstained with DAPI (blue). Scale bars = 50  
9  $\mu\text{m}$ . **(D)** BCA analysis of the protein yield of apoEVs and exosomes (Exos) from  $10^6$  MSCs.  $N$   
10 = 3 per group. **(E)** Representative transmission electron microscopy (TEM) image showing  
11 the morphologies of apoEVs. Scale bar = 100 nm. **(F)** Nanosight analysis showing diameters  
12 of apoEVs. **(G-I)** Representative fluorescent images show apoEV (labeled by CellMask™  
13 Deep Red, red) surface exposure of phosphatidylserine (PtdSer, Annexin V labeling) and  
14 expression of complement component 1q (C1q) and thrombospondin 1 (TSP1) (green). Flow  
15 cytometric analysis determined percentages of positively stained apoEVs. Scale bars = 25  $\mu\text{m}$ .  
16 **(J)** Western blot showing marker expression in apoEVs and source MSCs. **(K)** Flow  
17 cytometric analysis showed apoptosis of peripheral blood mononucleated cells (PBMNCs).  
18 PBMNCs from wild-type (WT), *Fas* mutant (*Fas<sup>mut</sup>*) or *Caspase-3* knockout (*Casp3<sup>-/-</sup>*) mice,  
19 staining with Annexin V and 7AAD. Percentages of Annexin V<sup>+</sup> cells were quantified as  
20 apoptotic rates. ND, not detected.  $N = 3$  per group. **(L)** Flow cytometric analysis showed  
21 apoptosis of bone marrow mononucleated cells (BMMNCs). BMMNCs from WT, *Fas<sup>mut</sup>* or  
22 *Casp3<sup>-/-</sup>* mice were stained with Annexin V and 7AAD. Percentages of Annexin V<sup>+</sup> cells were

1 quantified as apoptotic rates.  $N = 3$  per group. **(M)** Flow cytometric analysis showed  
2 apoptosis of liver non-parenchymal cells (NPCs). NPCs from WT, *Fas<sup>mut</sup>* or *Casp3<sup>-/-</sup>* mice were  
3 stained with Annexin V and 7AAD. Percentages of Annexin V<sup>+</sup> cells were quantified as  
4 apoptotic rates.  $N = 3$  per group. **(N)** Schematic diagram demonstrating the liver cell and EV  
5 isolation protocol. HCs, hepatocytes. **(O)** Representative TEM image showing the  
6 morphologies of liver EVs. Scale bar = 50 nm. **(P)** Nanosight analysis showing diameters of  
7 liver EVs. **(Q)** Western blot showing marker expression in liver EVs and HCs. Data represent  
8 mean  $\pm$  standard deviation. \*\*\*,  $P < 0.0001$ . Statistical analyses were performed by one-way  
9 analysis of variance followed by the Newman-Keuls post hoc tests.

10

11 **Figure S2. Phenotypic profiles of *Fas* mutant (*Fas<sup>mut</sup>*) mice after apoEV infusion. (A)**

12 Gross view images of 16-week-old mice and quantification of body weight (BW). WT, wild type.

13 Scale bars = 1 cm.  $N = 6$  per group. \*\*\*,  $P < 0.0001$ , *Fas<sup>mut</sup>* mice compared to WT mice; NS,

14 not significant,  $P > 0.05$ , *Fas<sup>mut</sup>* mice after apoEV infusion compared to *Fas<sup>mut</sup>* mice. **(B)**

15 Quantification of food intake of 16-week-old mice. NS, not significant,  $P > 0.05$ . **(C)**

16 Spontaneous activity of 16-week-old mice was assessed by running distance per hour using a

17 cage running wheel system. Gray area indicates dark phase.  $N = 3$  per group. **(D)**

18 Enzyme-linked immunosorbent assay (ELISA) detected serum levels of tumor necrosis

19 factor-alpha (TNF- $\alpha$ ) and interleukin-6 (IL-6) in 16-week-old mice. NS, not significant,  $P > 0.05$ .

20  $N = 6$  per group. **(E)** ZetaView analysis showing liver tissue extracellular vesicles (EVs) and

21 corresponding quantification. NS, not significant,  $P > 0.05$ .  $N = 3$  per group. **(F)** Masson's

22 trichrome staining showing liver tissue and corresponding quantification of fibrotic area

1 percentages. Scale bars = 50  $\mu$ m. NS, not significant,  $P > 0.05$ .  $N = 6$  per group. **(G)** Hepatic  
2 inflammation scores were examined based on pathological parameters. NS, not significant,  $P >$   
3  $0.05$ .  $N = 6$  per group. **(H)** Tracing of PKH26-labeled (for membrane) or aggregation-induced  
4 emission luminogen (AIEgen, for mitochondria)-labeled apoEVs (red) in liver, with Kupffer cell  
5 membranes stained with F4/80 (green) and counterstaining with DAPI for DNA (blue).  
6 ApoEVs were intravenously injected and liver samples were collected at 24 h after the  
7 infusion. Representative confocal images showed macrophages. Scale bars = 5  $\mu$ m. Data  
8 represent mean  $\pm$  standard deviation. Statistical analyses were performed by one-way  
9 analysis of variance followed by the Newman-Keuls post hoc tests.

10

11 **Figure S3. Caspase-3 knockout (*Casp3*<sup>-/-</sup>) mice demonstrate hepatic disorders rescued**  
12 **by apoEV infusion. (A)** Schematic diagram demonstrates the study design of apoEV infusion  
13 in *Casp3*<sup>-/-</sup> mice. ApoEVs were infused intravenously (*i.v.*) at a protein concentration of 5  $\mu$ g/g.  
14 **(B)** ZetaView analysis showing liver tissue extracellular vesicles (EVs) and corresponding  
15 quantification. WT, wild type.  $N = 3$  per group. **(C)** Flow cytometric analysis showing Annexin  
16 V<sup>+</sup> liver tissue EVs (apoEVs) with corresponding quantification.  $N = 3$  per group. **(D)**  
17 Hematoxylin and eosin (H&E) staining of liver tissues in periportal vein (PV) area. Hepatic  
18 injury scores were examined based on pathological parameters. Scale bars = 50  $\mu$ m.  $N = 4$   
19 per group. **(E)** Serum alanine aminotransferase (ALT) levels were determined.  $N = 4$  per  
20 group. **(F)** Representative liver fluorescent images show hepatocytes (HCs) with different  
21 nuclei (blue, DAPI for DNA) and their cell borders (green, phalloidin for F-actin). # indicates  
22 binucleated HCs. Percentages of binucleated HCs were accordingly quantified. Scale bars =

1 25  $\mu\text{m}$ .  $N = 4$  per group. **(G)** Diploid HCs (2N-HCs) were analyzed by flow cytometry after  
2 propidium iodide (PI) staining.  $N = 4$  per group. **(H)** Tracing of PKH26-labeled apoEVs (red) in  
3 sorted tetraploid HCs (4N-HCs), with Golgi apparatus being demonstrated by a plasmid of  
4 *N*-acetylgalactosaminyltransferase 2 (GALNT2)-GFP (green) and counterstaining by DAPI for  
5 DNA (blue). Imaging analysis was performed to quantify HC percentages with Golgi  
6 fragmentation. Scale bars = 5  $\mu\text{m}$ .  $N = 4$  per group. **(I)** Golgi apparatus was isolated from  
7 cultured HCs and Golgi protein mass was determined by using the BCA method.  $N = 4$  per  
8 group. Data represent mean  $\pm$  standard deviation. \*,  $P < 0.05$ ; \*\*,  $P < 0.01$ ; \*\*\*,  $P < 0.0001$ ;  
9 NS, not significant,  $P > 0.05$ . Statistical analyses were performed by one-way analysis of  
10 variance followed by the Newman-Keuls post hoc tests.

11

12 **Figure S4. Tetraploid hepatocytes (4N-HCs) are weaker in metabolic activity and more**  
13 **prone to oxidative stress than diploid hepatocytes (2N-HCs).** **(A)** Flow cytometric sorting  
14 of primary mouse HCs based on Hoechst 33342 staining. Representative bright field images  
15 showing morphologies of 2N- and 4N-HCs. Scale bars = 10  $\mu\text{m}$ . **(B)** Oxidative  
16 phosphorylation (OXPHOS) metabolic activities of sorted HCs were analyzed by oxygen  
17 consumption kinetics. WT, wild type; *Fas*<sup>mut</sup>, *Fas* mutant; apoEVs, apoptotic extracellular  
18 vesicles.  $N = 3$  per group. Curves are depicted with mean values. **(C)** Intensity of cellular  
19 reactive oxygen species (ROS) in sorted HCs were analyzed by the 2',7'-dichlorofluorescein  
20 diacetate (DCFDA) probe.  $N = 3$  per group. Data represent mean  $\pm$  standard deviation. **(D)**  
21 Quantitative real-time polymerase chain reaction (qRT-PCR) showed mRNA expression of  
22 multiple antioxidants in sorted HCs normalized to  *$\beta$ -actin*. Nfe2l2, nuclear factor erythroid

1 2-related factor 2; Sod2, superoxide dismutase 2; Cat, catalase; Nqo1, NAD(P)H quinone  
2 dehydrogenase 1; Gclc, glutamate-cysteine ligase catalytic subunit; Gpx1, glutathione  
3 peroxidase 1; Gsr, glutathione reductase.  $N = 3$  per group. Data represent mean  $\pm$  standard  
4 deviation. **(E)** OXPHOS metabolic activities of unsorted primary HCs were analyzed based on  
5 oxygen consumption kinetics.  $N = 3$  per group. Curves are depicted with mean values. **(F)**  
6 Intensity of cellular ROS in unsorted primary HCs was determined by the DCFDA probe.  $N = 3$   
7 per group. Data represent mean  $\pm$  standard deviation. \*\*,  $P < 0.01$ ; \*\*\*,  $P < 0.0001$ . Statistical  
8 analyses were performed by Student's  $t$  test for two-group analysis or one-way analysis of  
9 variance followed by the Newman-Keuls post hoc tests for multiple group comparisons.

10

11 **Figure S5. Circulating extracellular vesicles (EVs) in parabiosis mice contribute to liver**  
12 **homeostasis. (A)** Schematic diagram demonstrates the study design of parabiosis using *Fas*  
13 mutant (*Fas<sup>mut</sup>*) mice and green fluorescent protein (GFP) transgenic (*GFP<sup>+/+</sup>*) mice.  
14 *N*-acetylgalactosamine (GalNAc) was injected subcutaneously (s.c.) at 500 mg/kg once per  
15 week for inhibiting hepatocyte (HC) uptake of apoEVs. **(B)** Tracing of GFP-labeled particles  
16 (green) in liver of *Fas<sup>mut</sup>* mice, with HC cell borders being stained with phalloidin for F-actin  
17 (red) and counterstaining with DAPI for DNA (blue). Representative confocal images show  
18 binucleated HCs. Scale bar = 10  $\mu$ m. **(C)** Hematoxylin and eosin (H&E) staining of liver  
19 tissues in periportal vein (PV) area. Hepatic injury scores were examined based on  
20 pathological parameters. Scale bars = 50  $\mu$ m.  $N = 4$  per group. **(D)** Serum alanine  
21 aminotransferase (ALT) levels were determined.  $N = 4$  per group. **(E)** Representative liver  
22 fluorescent images show HCs with different numbers of nuclei (blue, DAPI for DNA) and their

1 cell borders (green, phalloidin for F-actin). # indicates binucleated HCs. Percentages of  
2 binucleated HCs were accordingly quantified. Scale bars = 25  $\mu$ m. *N* = 4 per group. **(F)** Diploid  
3 HCs (2N-HCs) were analyzed by flow cytometry after propidium iodide (PI) staining. *N* = 4 per  
4 group. **(G)** Representative Golgin84 immunofluorescent staining (green) images of liver Golgi  
5 counterstained with DAPI (blue). Imaging analysis was performed to quantify Golgi area  
6 percentages. Scale bars = 5  $\mu$ m. *N* = 4 per group. **(H)** Golgi apparatus was isolated from liver  
7 and Golgi protein mass was determined using the BCA method. *N* = 4 per group. Data  
8 represent mean  $\pm$  standard deviation. \*\*, *P* < 0.01; \*\*\*, *P* < 0.0001. Statistical analyses were  
9 performed by one-way analysis of variance followed by the Newman-Keuls post hoc tests.

10

11 **Figure S6. ApoEVs are characterized by a general combined surface signature for liver**  
12 **regulation. (A-C)** Flow cytometric analyses were performed to determine percentages of  
13 positively stained apoEVs by Annexin V for surface exposure of phosphatidylserine (PtdSer),  
14 by FITC-conjugated lectins for surface exposure of galactose (Gal) and  
15 *N*-acetylgalactosamine (GalNAc), and by a specific antibody for surface expression of  
16 vesicle-associated membrane protein 3 (VAMP3). The general apoptotic vesicular signature  
17 (AVS) was identified with apoEVs from B-cell lymphoma-2 (Bcl-2) homology domain 3  
18 (BH3)-mimetic ABT-737-induced apoptosis (*via* the intrinsic pathway) of human mesenchymal  
19 stem cells derived from the umbilical cord (hMSCs, **A**), anti-Fas-induced apoptosis (*via* the  
20 extrinsic pathway) of activated mouse T lymphocytes (**B**), and staurosporine (STS)-induced  
21 apoptosis of the mouse fibroblast cell line NIH/3T3 (**C**). **(D)** Graphical summary demonstrates  
22 the main findings of this study. ApoEVs were characterized by the specific AVS and engrafted

1 in liver. ApoEVs are recognized and uptaken by hepatocytes (HCs) through the  
2 asialoglycoprotein receptor (ASGPR), in which they assemble with the Golgi apparatus to  
3 form a chimeric ApoEV-Golgi Complex (AGC) based on the soluble  
4 *N*-ethylmaleimide-sensitive factor attachment protein receptor (SNARE) mechanism. ApoEV  
5 uptake and AGC assembly activate downstream functional cascades including microtubule  
6 acetylation and cytokinesis of HCs, which are indispensable for ploidy transition of HCs to  
7 safeguard diploid (2N) rather than tetraploid (4N) HC populations. Ultimately, apoEVs are of  
8 functional significance for maintaining liver homeostasis, promoting liver regeneration and  
9 mediating therapy for acute liver failure.

10



1 **Supplementary tables** (For Table S1, see the Key Resources Table)

2 **Table S2. Primers used in this study.**

| Mouse genes                   | Primer sequences                                                             |
|-------------------------------|------------------------------------------------------------------------------|
| <i>Actb</i> ( $\beta$ -actin) | Forward: 5'-AGCGGTTCCGATGCCCT-3'<br>Reverse: 5'-TTGGCATAGAGGTCTTTACGGATG-3'  |
| <i>Anln</i>                   | Forward: 5'-CTGAACTCAGGATCCGAAGCAT-3'<br>Reverse: 5'-ACTGGAGTAGCTGAGGCATT-3' |
| <i>Nfe2l2</i>                 | Forward: 5'-GGACATGGAGCAAGTTTGGC-3'<br>Reverse: 5'-CCAGCGAGGAGATCGATGAG-3'   |
| <i>Sod2</i>                   | Forward: 5'-GCCTGCTCTAATCAGGACCC-3'<br>Reverse: 5'-GTAGTAAGCGTGCTCCCACA-3'   |
| <i>Cat</i>                    | Forward: 5'-CACTGACGAGATGGCACACT-3'<br>Reverse: 5'-TGTGGAGAATCGAACGGCAA-3'   |
| <i>Nqo1</i>                   | Forward: 5'-CGCCTGAGCCCAGATATTGT-3'<br>Reverse: 5'-GCACTCTCTCAAACCAGCCT-3'   |
| <i>Gclc</i>                   | Forward: 5'-CACATCTACCACGCAGTCAA-3'<br>Reverse: 5'-GGATGGTTGGGGTTTGTCTC-3'   |
| <i>Gpx1</i>                   | Forward: 5'-CTCGGTTTCCCGTGCAATCA-3'<br>Reverse: 5'-GGTCGGACGTACTTGAGGGA-3'   |
| <i>Gsr</i>                    | Forward: 5'-CGTCTATGCTGTGGGAGACG-3'<br>Reverse: 5'-GGCTGAAGACCACAGTAGGG-3'   |

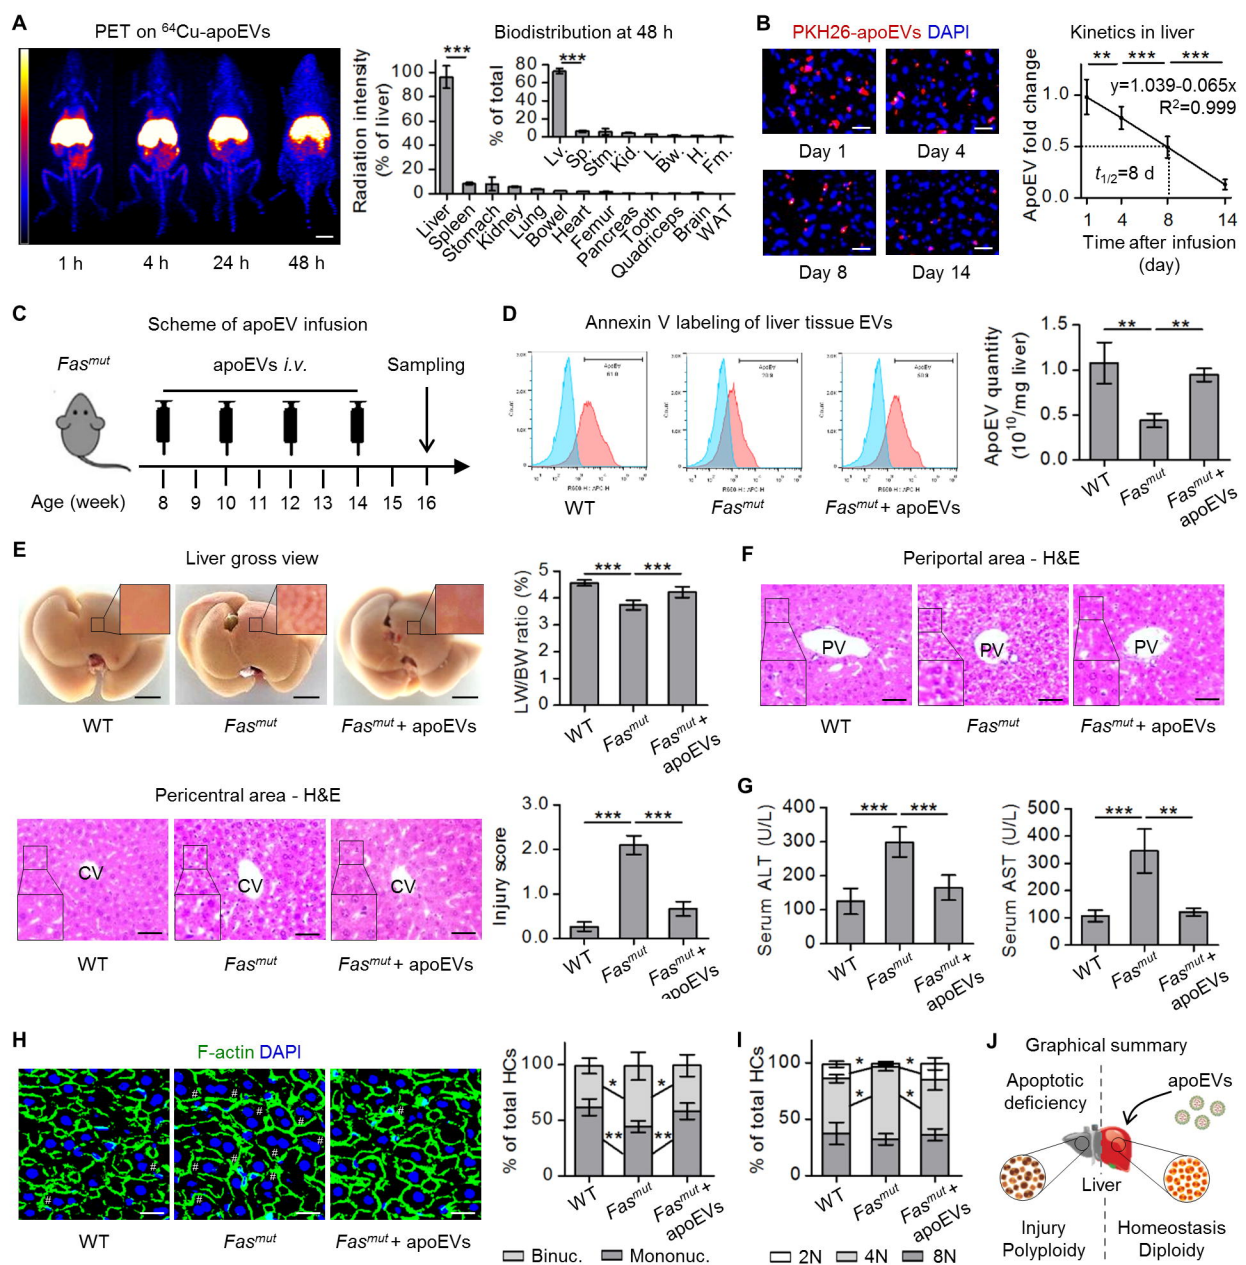

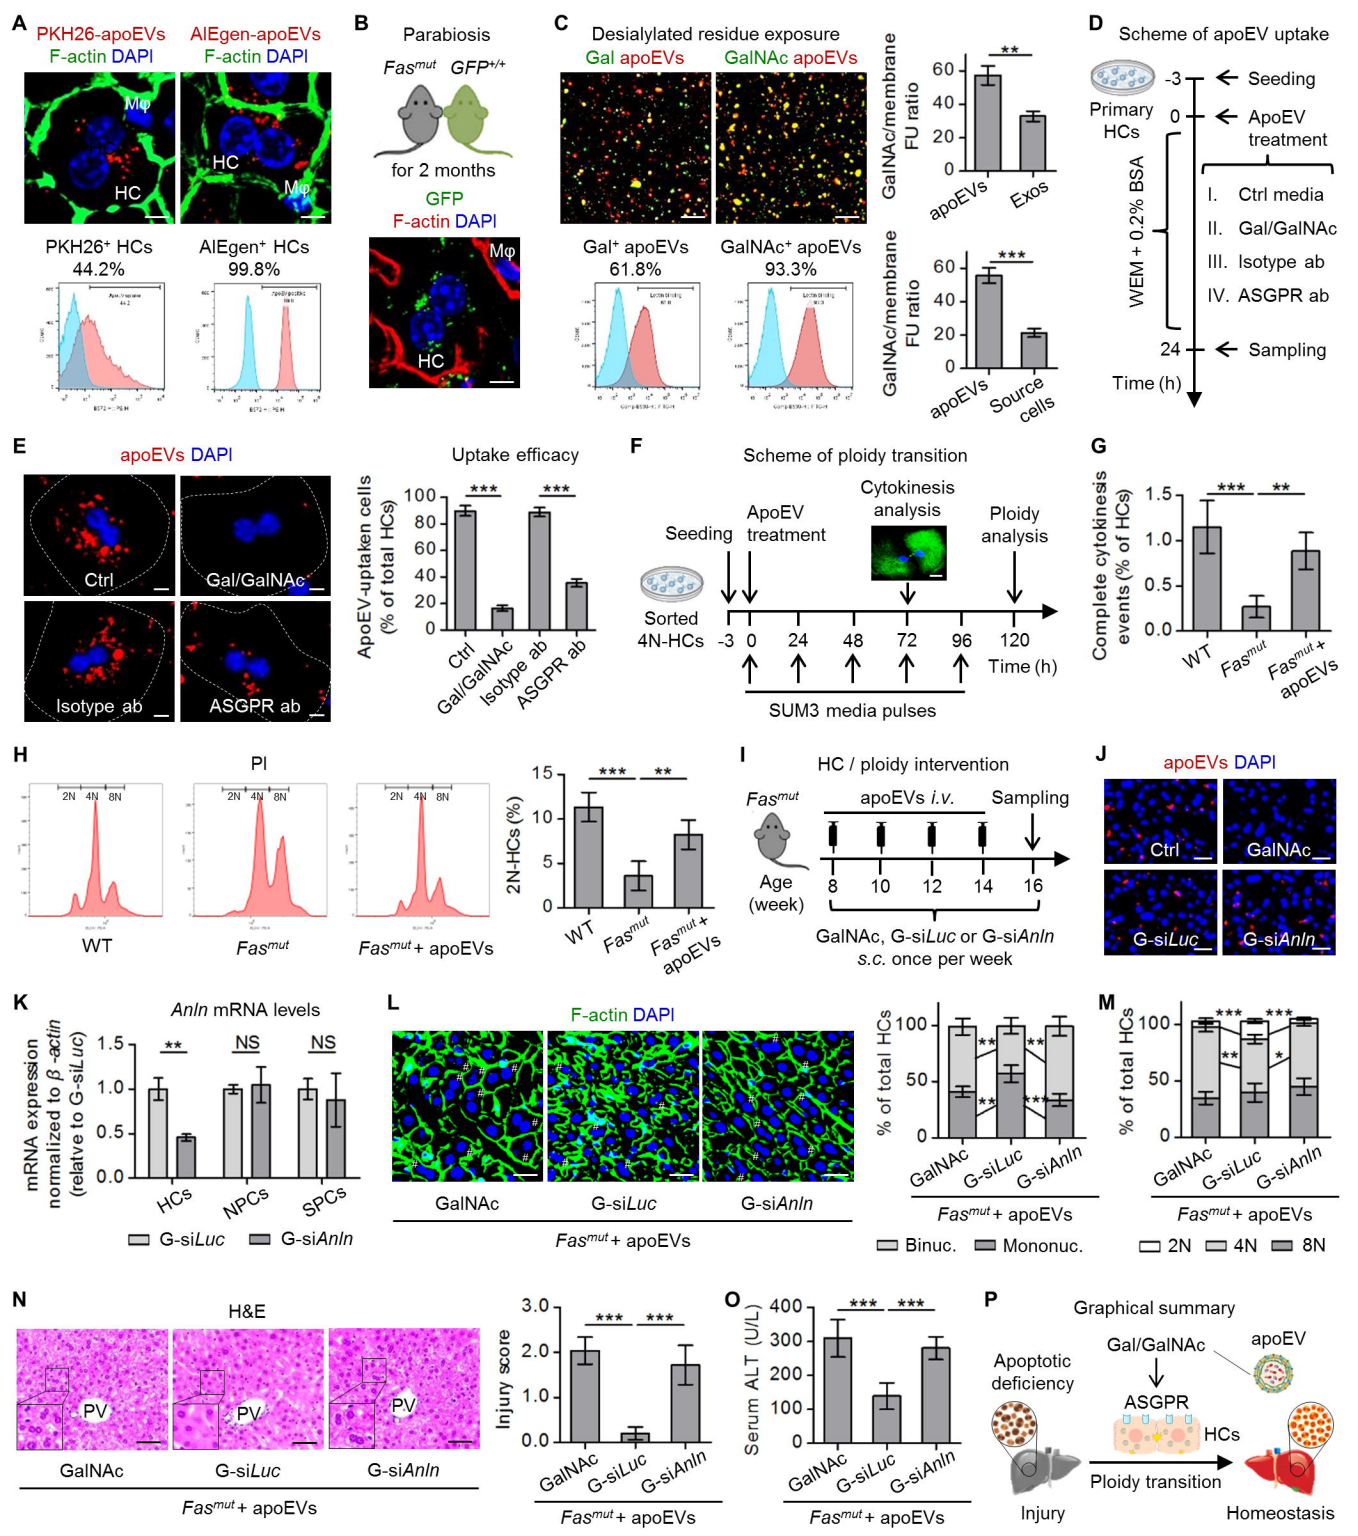

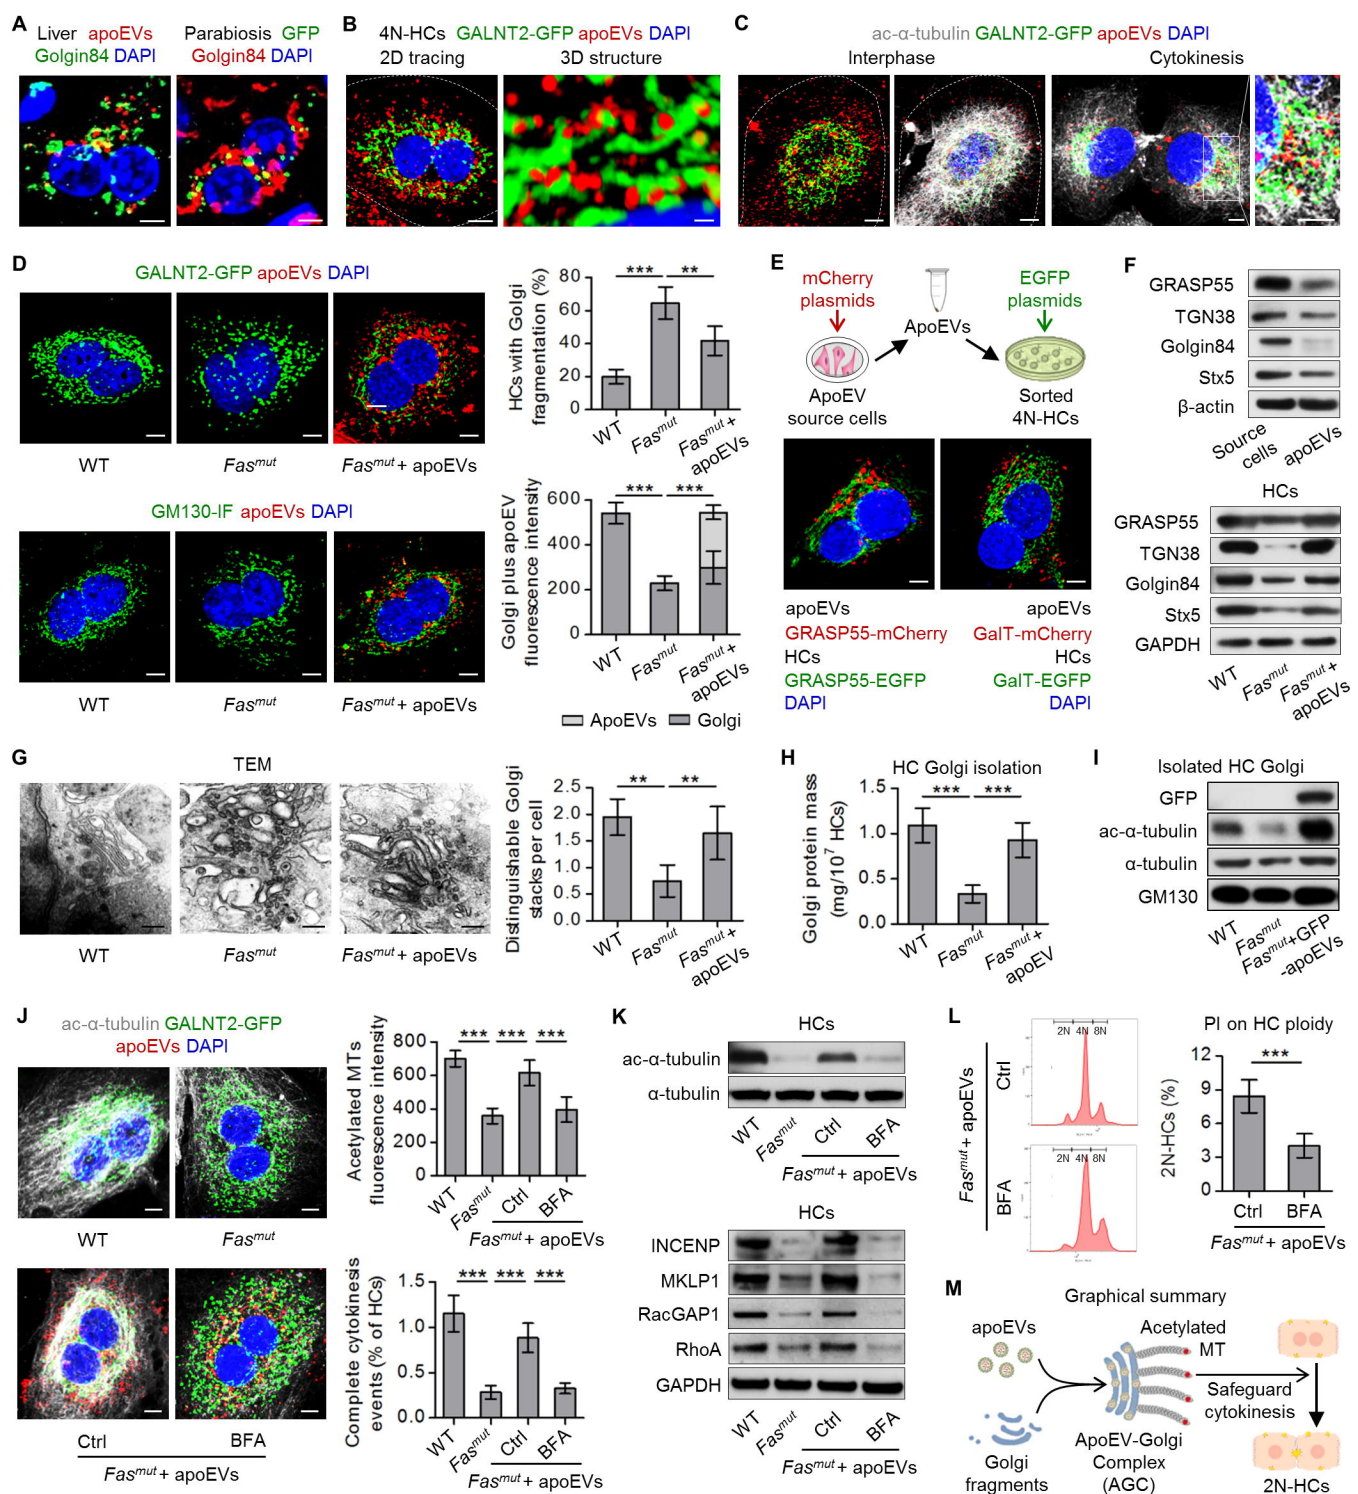

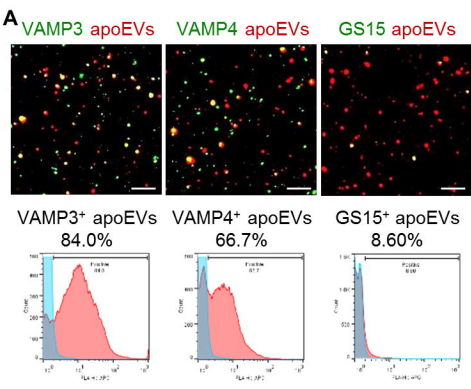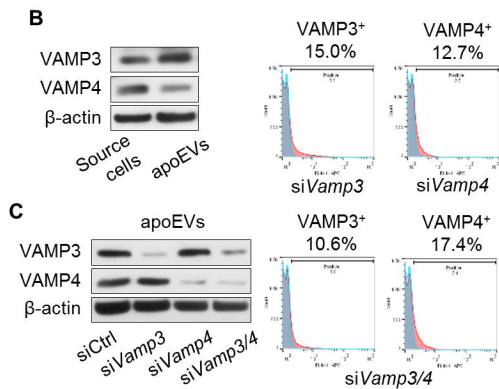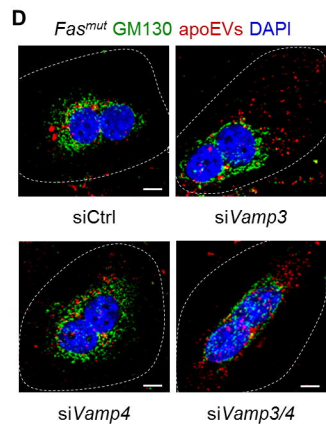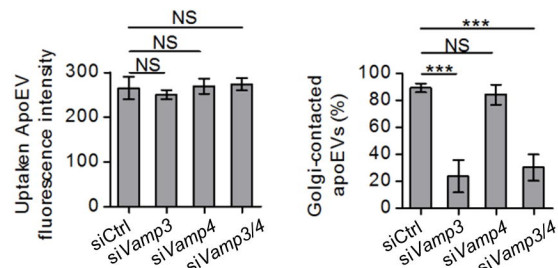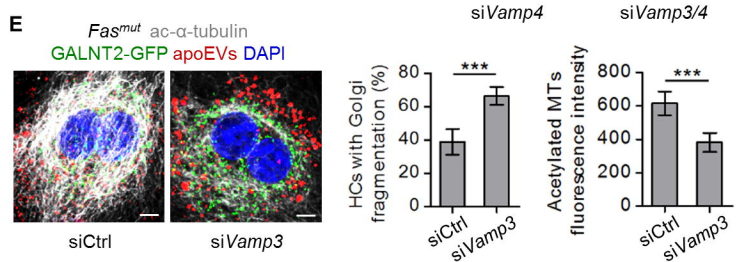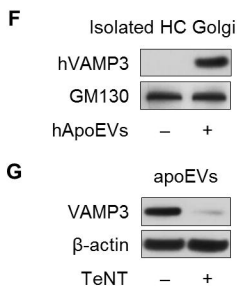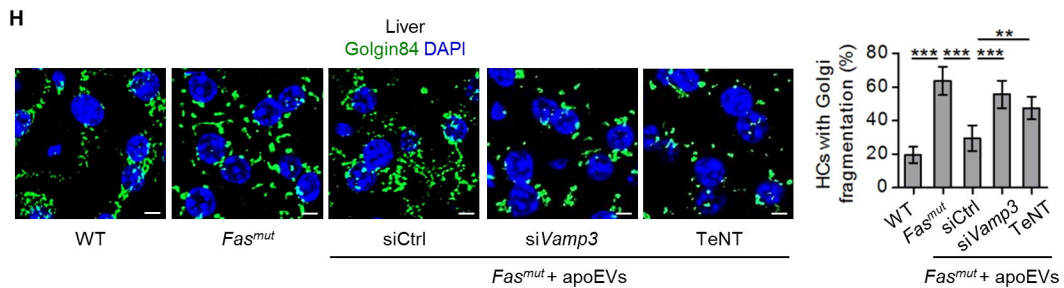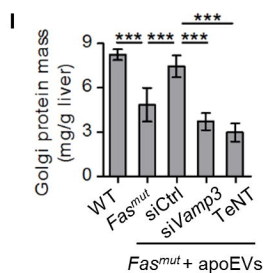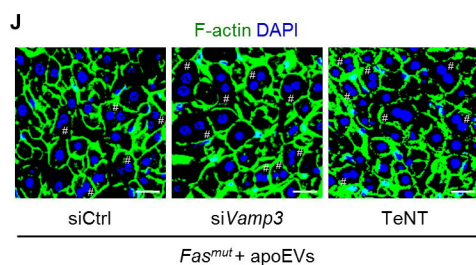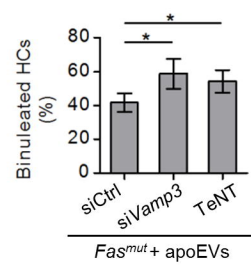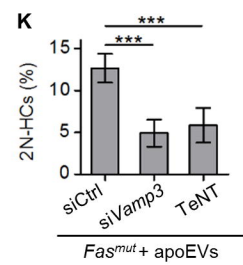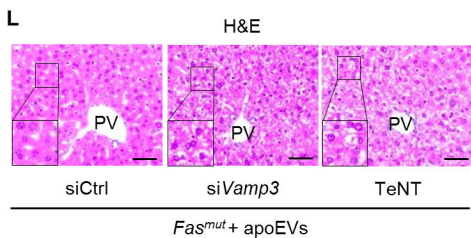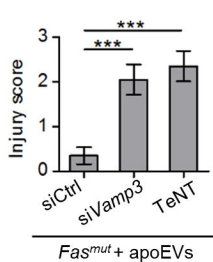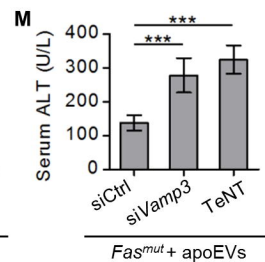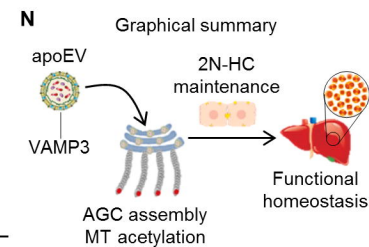

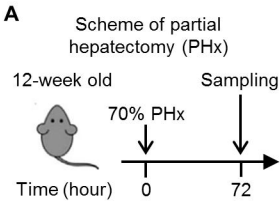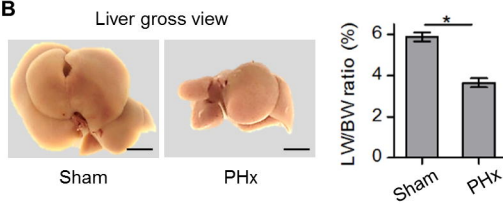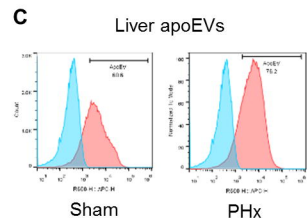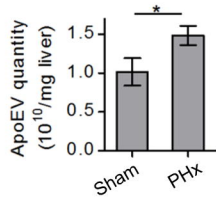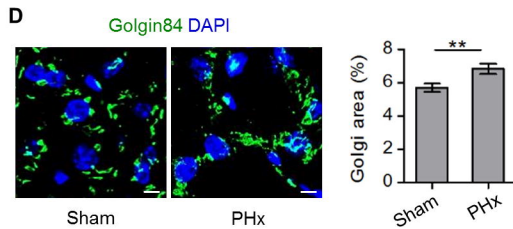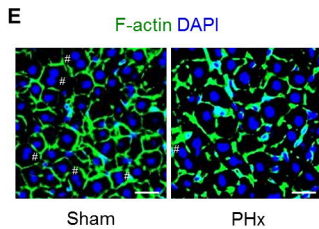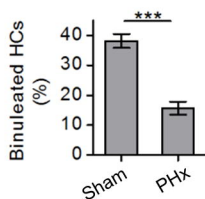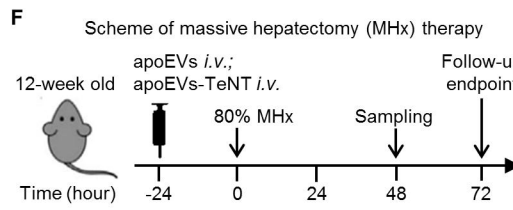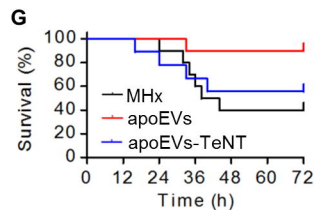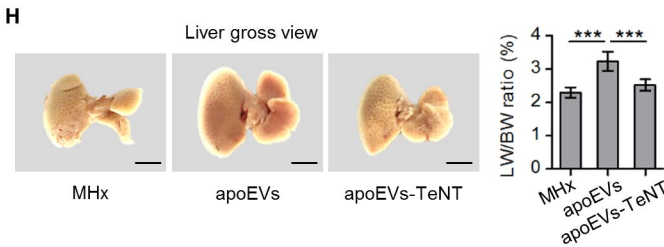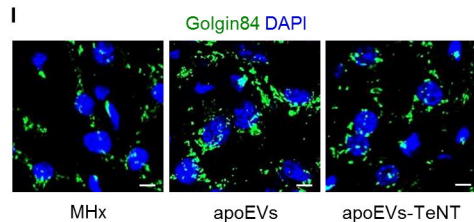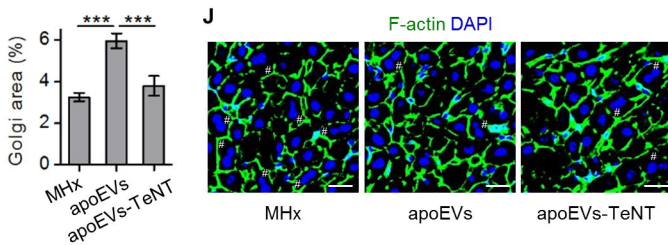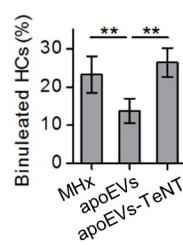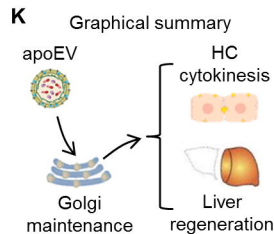

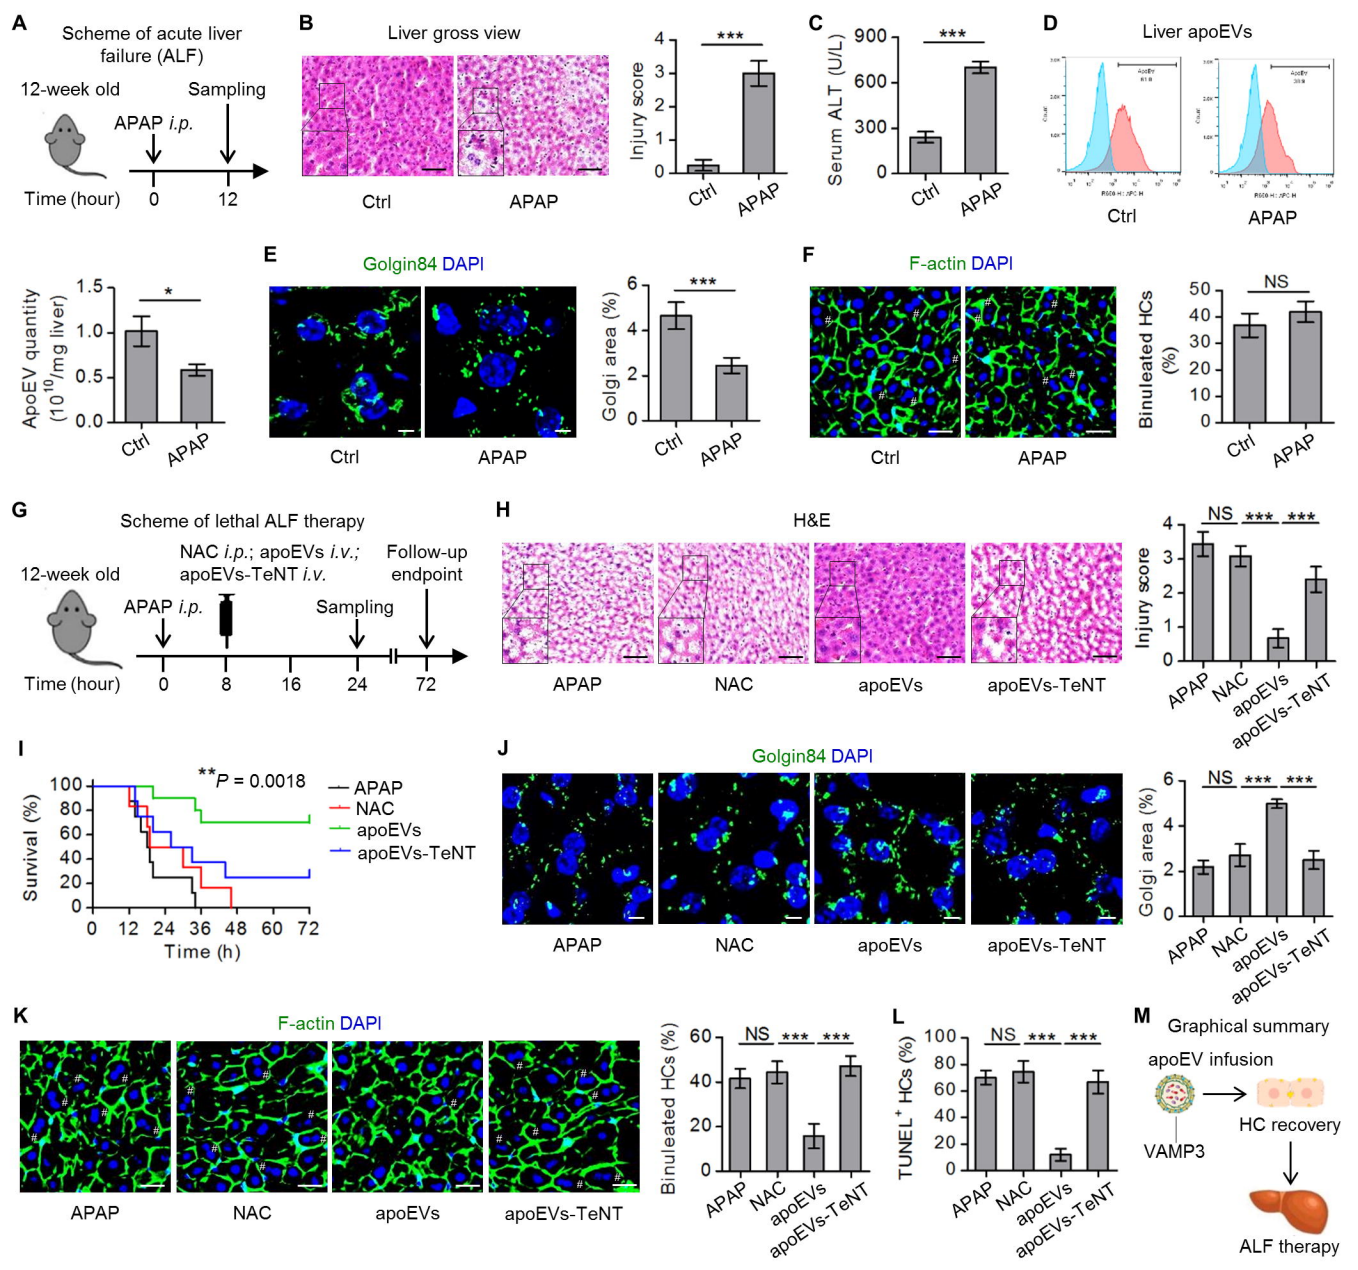

Source: https://www.biorxiv.org/content/biorxiv/early/2021/02/24/2021.02.24.432630.full.pdf
